# Supplementary material for: Myosin light chain 3 serves as a receptor for nervous necrosis virus entry into host cells via the macropinocytosis pathway
Source: eLife journal article supplement (doi:10.7554/elife.104772), 2024-12-17
Supplement: fig1-data3 [file elife-104772-fig1-data3-v1.zip]

## Sheet: Sheet1
Original data of Figure 1B
Distance (pixels)	Gray value (CP)	Gray value (MmMYL3)
0	0	0.265
0.01389	0	0.2747
0.02778	0	0.2759
0.04167	0	0.3126
0.05556	0	0.326
0.06944	0	0.3529
0.08333	0	0.348
0.09722	0	0.3541
0.11111	0	0.4298
0.125	0	0.4054
0.13889	0.0012	0.4567
0.15278	0.0049	0.442
0.16667	0.011	0.5409
0.18056	0.011	0.6056
0.19444	0.0269	0.6154
0.20833	0.0403	0.6886
0.22222	0.0659	0.7387
0.23611	0.0891	0.8034
0.25	0.1123	0.8339
0.26389	0.1538	0.9475
0.27778	0.1832	1.0525
0.29167	0.2222	1.1856
0.30556	0.2833	1.232
0.31944	0.3309	1.2796
0.33333	0.4054	1.4676
0.34722	0.4701	1.58
0.36111	0.5665	1.6105
0.375	0.6361	1.8144
0.38889	0.7338	1.9817
0.40278	0.8437	2.2161
0.41667	0.9475	2.2821
0.43056	1.0806	2.4774
0.44444	1.2442	2.6276
0.45833	1.3736	2.7814
0.47222	1.5531	3.0232
0.48611	1.7302	3.1844
0.5	1.9512	3.42
0.51389	2.2259	3.8022
0.52778	2.5409	3.8303
0.54167	2.8755	4.2332
0.55556	3.2821	4.431
0.56944	3.7863	4.7717
0.58333	4.2686	5.2589
0.59722	4.8254	5.9414
0.61111	5.3211	6.7387
0.625	5.862	7.5409
0.63889	6.2711	7.9426
0.65278	6.6581	8.1221
0.66667	7.0977	8.569
0.68056	7.5849	8.6068
0.69444	8.1136	9.5861
0.70833	8.6337	10.6667
0.72222	9.232	11.8046
0.73611	9.7814	12.8413
0.75	10.4359	13.254
0.76389	10.7998	13.5507
0.77778	11.0208	14.0012
0.79167	11.1514	14.2442
0.80556	11.1868	14.602
0.81944	11.4737	14.8571
0.83333	11.8254	15.033
0.84722	12.1502	15.4457
0.86111	12.2479	15.0965
0.875	12.2943	15.232
0.88889	12.3431	15.536
0.90278	12.3297	15.7643
0.91667	12.3687	16.2589
0.93056	12.4493	16.3846
0.94444	12.6984	16.4066
0.95833	13.1111	16.0879
0.97222	13.63	15.7228
0.98611	14.1258	15.7509
1	14.4957	15.8681
1.01389	14.7656	15.4701
1.02778	15.0794	16.0305
1.04167	15.442	16.2161
1.05556	15.8718	16.8718
1.06944	16.1514	17.2979
1.08333	16.1306	17.5446
1.09722	15.7009	18.0855
1.11111	15.315	17.9499
1.125	14.8022	17.8926
1.13889	14.0134	17.4481
1.15278	13.2589	16.6935
1.16667	12.3944	16.2955
1.18056	11.6984	16.1087
1.19444	11.2674	15.7839
1.20833	11.1209	15.7497
1.22222	11.3297	15.9499
1.23611	11.5958	16.1526
1.25	11.7924	15.989
1.26389	11.8547	15.5873
1.27778	11.8242	15.7949
1.29167	11.7521	16.0891
1.30556	11.663	16.0293
1.31944	11.5702	16.3407
1.33333	11.5519	16.2625
1.34722	11.5617	16.9707
1.36111	11.5775	17.3736
1.375	11.6337	18.0708
1.38889	11.5604	18.2601
1.40278	11.4799	18.3346
1.41667	11.5458	18.3748
1.43056	11.6862	18.652
1.44444	11.8193	19.2063
1.45833	11.967	19.21
1.47222	12.2613	19.9023
1.48611	12.6325	20.7656
1.5	13.138	21.4933
1.51389	13.7363	22.0122
1.52778	14.1832	22.4799
1.54167	14.5995	22.0586
1.55556	14.9548	22.2015
1.56944	15.2845	22.514
1.58333	15.5946	22.7741
1.59722	15.9658	23.6044
1.61111	16.4737	24.1368
1.625	17.1734	25.0977
1.63889	17.6716	25.5897
1.65278	18.0293	26.6801
1.66667	18.0672	27.2845
1.68056	18.0879	27.9035
1.69444	18.1734	28.6593
1.70833	18.3822	29.4176
1.72222	18.6789	29.7314
1.73611	18.8913	29.9475
1.75	19.0208	30.4982
1.76389	19.0281	30.2955
1.77778	19.0781	30.5873
1.79167	19.033	30.9536
1.80556	19.0269	30.8962
1.81944	18.9023	30.9451
1.83333	18.8181	31.6496
1.84722	18.8376	30.8169
1.86111	18.9634	31.1087
1.875	19.1233	30.9817
1.88889	19.0488	30.674
1.90278	18.9499	30.7253
1.91667	18.7497	31.3346
1.93056	18.9023	31.1087
1.94444	19.1453	30.9487
1.95833	19.4676	30.7534
1.97222	19.7521	30.8864
1.98611	20.0659	31.1673
2	20.3126	31.9487
2.01389	20.5836	32.6642
2.02778	21.0037	33.7155
2.04167	21.0232	34.3712
2.05556	20.8034	33.5128
2.06944	20.5299	34.0769
2.08333	20.2943	33.9341
2.09722	20.0806	33.9866
2.11111	19.8486	34.0598
2.125	19.7485	34.3687
2.13889	19.6862	34.5604
2.15278	19.5446	34.9011
2.16667	19.3455	34.7912
2.18056	19.0891	34.1429
2.19444	19.0012	34.2564
2.20833	19.0501	34.1258
2.22222	19.1709	33.8144
2.23611	19.3101	33.7277
2.25	19.3687	33.5641
2.26389	19.3321	33.3675
2.27778	19.2821	32.8059
2.29167	19.0916	32.5617
2.30556	18.8791	32.0122
2.31944	18.3663	30.6325
2.33333	17.8706	30.8059
2.34722	17.3565	30.1233
2.36111	16.9621	29.5287
2.375	16.6703	29.8376
2.38889	16.6337	29.5409
2.40278	16.7302	28.8156
2.41667	17.138	28.2698
2.43056	17.6508	28.4469
2.44444	17.9463	28.6349
2.45833	18.3187	29.5958
2.47222	18.5592	29.5592
2.48611	18.6667	29.3956
2.5	18.6093	28.5031
2.51389	18.2772	28.4469
2.52778	17.9585	27.8071
2.54167	17.5812	26.8193
2.55556	17.2918	26.0952
2.56944	17.0012	25.4542
2.58333	16.6838	25.1978
2.59722	16.2418	25.5507
2.61111	15.7009	25.5885
2.625	15.1538	25.4872
2.63889	14.8071	25.3675
2.65278	14.6862	25.2784
2.66667	14.6606	24.6581
2.68056	14.7277	24.5311
2.69444	14.8681	24.1099
2.70833	14.9316	23.4383
2.72222	14.79	23.2564
2.73611	14.6081	22.9023
2.75	14.2137	22.3614
2.76389	13.7668	22.4469
2.77778	13.4811	21.7485
2.79167	13.2491	21.2674
2.80556	13.1001	21.1795
2.81944	13.072	21.0525
2.83333	13.0794	21.0379
2.84722	13.1099	21.199
2.86111	13.1893	21.1587
2.875	13.4322	21.4664
2.88889	13.7656	21.7509
2.90278	14.033	21.6374
2.91667	14.2137	21.8376
2.93056	14.293	21.6105
2.94444	14.337	21.5421
2.95833	14.4164	21.7387
2.97222	14.4322	21.1514
2.98611	14.4298	21.2308
3	14.3028	20.7888
3.01389	14.1819	20.8339
3.02778	14.0098	21.243
3.04167	13.8706	21.5641
3.05556	13.6874	21.8022
3.06944	13.514	22.0159
3.08333	13.3248	21.8327
3.09722	12.9988	21.4322
3.11111	12.7485	20.6606
3.125	12.5092	20.9255
3.13889	12.3407	20.6349
3.15278	12.4579	20.5812
3.16667	12.7143	20.2442
3.18056	12.989	19.9695
3.19444	13.1612	19.6252
3.20833	13.2698	19.4799
3.22222	13.1526	19.4933
3.23611	12.9658	19.5678
3.25	12.6825	20.0806
3.26389	12.5201	20.0879
3.27778	12.3126	20.3944
3.29167	12.2063	20.2454
3.30556	12.0794	20.5263
3.31944	11.9475	20.2564
3.33333	11.7607	20.2784
3.34722	11.5665	19.8193
3.36111	11.337	19.3236
3.375	11.1245	18.221
3.38889	11.0281	17.1306
3.40278	10.9158	16.3138
3.41667	10.9866	16.4017
3.43056	10.9963	16.2576
3.44444	11.0281	16.2515
3.45833	10.8767	15.9194
3.47222	10.569	15.3773
3.48611	10.2137	14.8791
3.5	9.9353	14.3394
3.51389	9.5739	13.8364
3.52778	9.2454	13.1184
3.54167	9.0403	13.105
3.55556	8.9792	12.7155
3.56944	8.8669	13.0757
3.58333	8.8144	12.6007
3.59722	8.7778	12.4933
3.61111	8.674	12.9536
3.625	8.5726	12.5079
3.63889	8.3944	12.5287
3.65278	8.16	12.1416
3.66667	7.9402	11.7534
3.68056	7.7424	11.4274
3.69444	7.5836	11.022
3.70833	7.5238	10.7888
3.72222	7.3529	10.9915
3.73611	7.188	10.7753
3.75	7.0635	10.6886
3.76389	6.9353	10.851
3.77778	6.7411	10.8168
3.79167	6.4652	10.6129
3.80556	6.1392	10.6642
3.81944	5.8474	10.4371
3.83333	5.5324	10.4652
3.84722	5.2784	10.2527
3.86111	4.9817	10.3053
3.875	4.735	10.2845
3.88889	4.4444	10.1673
3.90278	4.1563	9.8462
3.91667	3.823	9.8376
3.93056	3.5116	9.3846
3.94444	3.2308	9.1929
3.95833	3.0049	8.7534
3.97222	2.7949	8.4505
3.98611	2.6129	7.884
4	2.4396	7.4676
4.01389	2.2576	7.5018
4.02778	2.1526	7.1062
4.04167	2.0391	6.9756
4.05556	1.8938	6.6581
4.06944	1.7595	6.5128
4.08333	1.641	6.1233
4.09722	1.547	6.1929
4.11111	1.4017	5.9243
4.125	1.2845	5.8376
4.13889	1.1917	5.7387
4.15278	1.1111	5.4676
4.16667	1.0159	5.464
4.18056	0.9683	5.3529
4.19444	0.8999	5.2723
4.20833	0.8376	5.0354
4.22222	0.7888	4.9951
4.23611	0.7509	4.8535
4.25	0.7204	4.7534
4.26389	0.6899	4.6398
4.27778	0.6471	4.5653
4.29167	0.6068	4.4359
4.30556	0.5836	4.3321
4.31944	0.5543	4.2723
4.33333	0.525	4.2955
4.34722	0.4799	4.0916
4.36111	0.4725	3.9707
4.375	0.4457	3.8657
4.38889	0.4396	3.884
4.40278	0.4322	3.8657
