# Supplementary material for: Myosin light chain 3 serves as a receptor for nervous necrosis virus entry into host cells via the macropinocytosis pathway
Source: eLife journal article supplement (doi:10.7554/elife.104772), 2024-12-17
Supplement: fig1-data5 [file elife-104772-fig1-data5-v1.pdf]

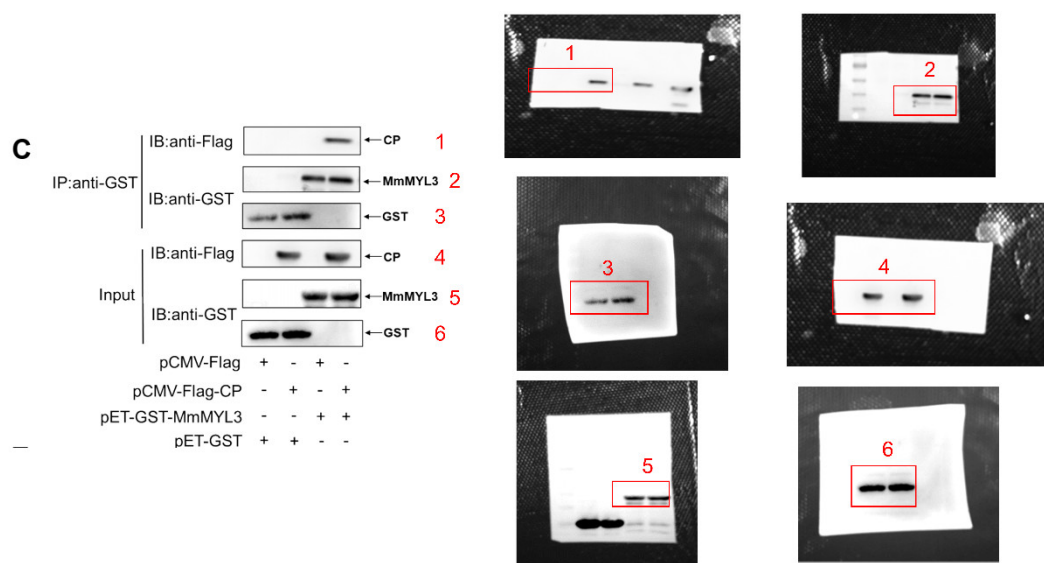

Figure 1, Source Data 2. Original membranes corresponding to Figure 1C. The red box marked as 1 represents the CP of the IP group. The red box marked as 2 represents the MmMYL3 of the IP group. The red box marked as 3 represents the GST of the IP group. The red box marked as 4 represents the CP of the input group. The red box marked as 5 represents the MmMYL3 of the input group. The red box marked as 6 represents the GST of the input group.
