# Supplementary material for: Myosin light chain 3 serves as a receptor for nervous necrosis virus entry into host cells via the macropinocytosis pathway
Source: eLife journal article supplement (doi:10.7554/elife.104772), 2024-12-17
Supplement: fig1-data7 [file elife-104772-fig1-data7-v1.pdf]

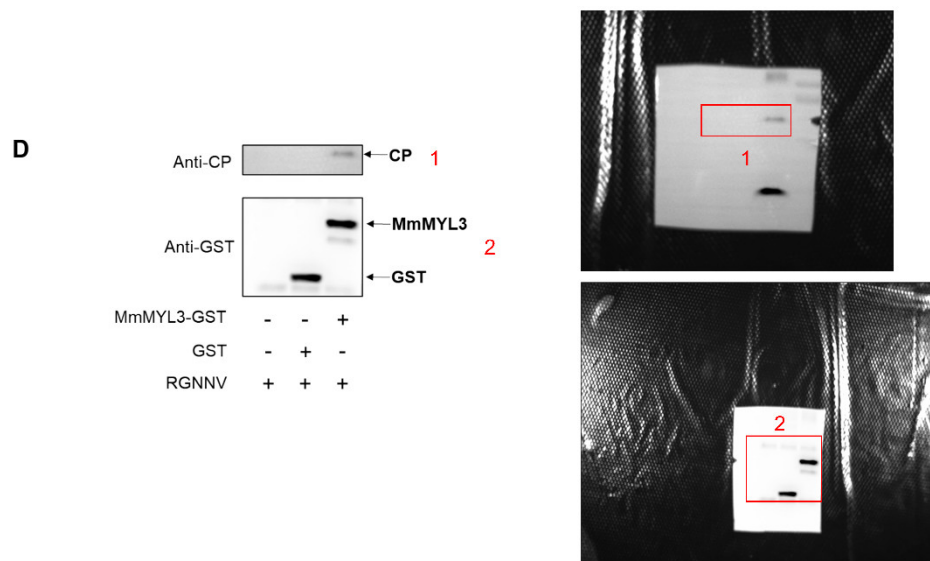

Figure 1, Source Data 3. Original membranes corresponding to Figure 1D. The red box marked as 1 represents the CP of the IP group. The red box marked as 2 represents the MmMYL3 and GST of the IP group.
