# Supplementary material for: Myosin light chain 3 serves as a receptor for nervous necrosis virus entry into host cells via the macropinocytosis pathway
Source: eLife journal article supplement (doi:10.7554/elife.104772), 2024-12-17
Supplement: fig1-data8 [file elife-104772-fig1-data8-v1.zip]

## Sheet: Sheet1
Original data of Figure 1E
Time (s)	5μM	10μM	20μM	40μM	80μM
-59.96	-0.54004	-0.40039	-0.30762	-0.68262	-0.67188
-59.86	-0.54004	-0.40039	-0.30762	-0.68262	-0.67188
-59.76	-0.55957	-0.40039	-0.33692	-0.71192	-0.67188
-59.66	-0.56738	-0.42383	-0.34863	-0.71192	-0.67188
-59.56	-0.58301	-0.43164	-0.34277	-0.68848	-0.66406
-59.46	-0.60254	-0.44727	-0.34863	-0.72363	-0.73438
-59.36	-0.56738	-0.46289	-0.34863	-0.70606	-0.67188
-59.26	-0.55957	-0.47852	-0.36621	-0.74121	-0.67188
-59.16	-0.59082	-0.49414	-0.35449	-0.72949	-0.69531
-59.06	-0.55566	-0.49414	-0.33106	-0.67676	-0.67188
-58.96	-0.5752	-0.49023	-0.36035	-0.73535	-0.71094
-58.86	-0.55957	-0.5332	-0.33106	-0.70606	-0.71094
-58.76	-0.53028	-0.52148	-0.28125	-0.66797	-0.65235
-58.66	-0.53613	-0.51172	-0.30176	-0.64746	-0.66406
-58.56	-0.53613	-0.51758	-0.27246	-0.67676	-0.63281
-58.46	-0.55176	-0.52148	-0.30762	-0.7002	-0.625
-58.36	-0.52637	-0.52539	-0.2959	-0.6709	-0.58594
-58.26	-0.49317	-0.5293	-0.30176	-0.67676	-0.58594
-58.16	-0.49316	-0.51758	-0.30176	-0.67676	-0.54688
-58.06	-0.46973	-0.5293	-0.2666	-0.6709	-0.53906
-57.96	-0.46973	-0.51758	-0.2959	-0.6709	-0.53906
-57.86	-0.4502	-0.53711	-0.30176	-0.6709	-0.54688
-57.76	-0.44238	-0.51758	-0.29004	-0.66504	-0.53125
-57.66	-0.43457	-0.5293	-0.27246	-0.64746	-0.46875
-57.56	-0.43848	-0.51367	-0.27832	-0.65332	-0.4375
-57.46	-0.46973	-0.48633	-0.32519	-0.72949	-0.53906
-57.36	-0.48926	-0.53711	-0.2959	-0.72949	-0.53906
-57.26	-0.46973	-0.55664	-0.2959	-0.73535	-0.50782
-57.16	-0.49316	-0.53711	-0.27246	-0.71777	-0.46875
-57.06	-0.5127	-0.53711	-0.27246	-0.73535	-0.50781
-56.96	-0.5127	-0.54102	-0.24317	-0.69434	-0.46875
-56.86	-0.53809	-0.52148	-0.2666	-0.72949	-0.53906
-56.76	-0.55567	-0.51758	-0.2959	-0.76465	-0.5625
-56.66	-0.55566	-0.53711	-0.30176	-0.73535	-0.53125
-56.56	-0.60254	-0.51758	-0.30176	-0.80567	-0.54688
-56.46	-0.61426	-0.51758	-0.27246	-0.79395	-0.54688
-56.36	-0.59473	-0.52148	-0.24902	-0.77637	-0.5
-56.26	-0.59473	-0.50586	-0.2666	-0.73535	-0.5
-56.16	-0.59473	-0.51758	-0.2666	-0.73535	-0.50781
-56.06	-0.58691	-0.53711	-0.29004	-0.72363	-0.53125
-55.96	-0.5752	-0.5293	-0.25489	-0.70606	-0.46875
-55.86	-0.55176	-0.47852	-0.2666	-0.70019	-0.46094
-55.76	-0.54785	-0.45508	-0.27832	-0.71777	-0.47656
-55.66	-0.61426	-0.44727	-0.32519	-0.73535	-0.50781
-55.56	-0.59473	-0.43945	-0.30762	-0.70606	-0.49219
-55.46	-0.59473	-0.41992	-0.30176	-0.70606	-0.46875
-55.36	-0.59473	-0.40039	-0.31934	-0.64746	-0.46875
-55.26	-0.59082	-0.40039	-0.2959	-0.6709	-0.5
-55.16	-0.58301	-0.41602	-0.2666	-0.6416	-0.50781
-55.06	-0.61426	-0.39648	-0.2959	-0.6416	-0.54688
-54.96	-0.61426	-0.39648	-0.33106	-0.63575	-0.58594
-54.86	-0.59473	-0.39648	-0.27246	-0.58887	-0.58594
-54.76	-0.59473	-0.37305	-0.33106	-0.61817	-0.58594
-54.66	-0.57129	-0.36133	-0.32519	-0.58301	-0.60156
-54.56	-0.57129	-0.33789	-0.32519	-0.58301	-0.625
-54.46	-0.58301	-0.3457	-0.36035	-0.59473	-0.66406
-54.36	-0.60645	-0.35742	-0.33106	-0.58301	-0.66406
-54.26	-0.59473	-0.33789	-0.36035	-0.58301	-0.66406
-54.16	-0.5791	-0.33789	-0.32519	-0.55371	-0.70312
-54.06	-0.61035	-0.31445	-0.32519	-0.58301	-0.74219
-53.96	-0.61035	-0.3457	-0.33692	-0.58301	-0.74219
-53.86	-0.59473	-0.35742	-0.32519	-0.55371	-0.74219
-53.76	-0.59473	-0.33789	-0.2959	-0.52442	-0.73438
-53.66	-0.5752	-0.31836	-0.27246	-0.52442	-0.67188
-53.56	-0.59082	-0.29883	-0.2959	-0.48926	-0.66406
-53.46	-0.60059	-0.31445	-0.31055	-0.53906	-0.72266
-53.36	-0.59473	-0.32813	-0.30176	-0.55957	-0.75
-53.26	-0.57324	-0.33008	-0.31641	-0.57422	-0.77734
-53.16	-0.5752	-0.33203	-0.33106	-0.55371	-0.78906
-53.06	-0.5459	-0.33789	-0.31641	-0.50977	-0.76953
-52.96	-0.56543	-0.32813	-0.31641	-0.54492	-0.76953
-52.86	-0.54199	-0.32813	-0.32227	-0.50977	-0.80078
-52.76	-0.53613	-0.32422	-0.34863	-0.53027	-0.78906
-52.66	-0.5166	-0.31836	-0.31348	-0.53027	-0.75781
-52.56	-0.5166	-0.33008	-0.36621	-0.53027	-0.75781
-52.46	-0.52051	-0.3418	-0.36035	-0.52442	-0.71094
-52.36	-0.5127	-0.31836	-0.34863	-0.51269	-0.71094
-52.26	-0.5166	-0.31836	-0.33106	-0.47168	-0.71094
-52.16	-0.54395	-0.29883	-0.34277	-0.4834	-0.72656
-52.06	-0.55566	-0.32617	-0.36035	-0.53027	-0.83594
-51.96	-0.53613	-0.3418	-0.33106	-0.50098	-0.77735
-51.86	-0.55566	-0.32227	-0.36621	-0.51269	-0.75
-51.76	-0.55176	-0.3418	-0.38965	-0.542	-0.78125
-51.66	-0.54395	-0.35742	-0.37207	-0.51269	-0.79688
-51.56	-0.55566	-0.3457	-0.44824	-0.57129	-0.82031
-51.46	-0.55567	-0.38086	-0.42481	-0.58887	-0.78907
-51.36	-0.55566	-0.38086	-0.4541	-0.61817	-0.78906
-51.26	-0.5752	-0.40039	-0.4834	-0.65332	-0.77344
-51.16	-0.55176	-0.42773	-0.44824	-0.64746	-0.74219
-51.06	-0.5127	-0.41602	-0.41894	-0.60644	-0.70312
-50.96	-0.53613	-0.39648	-0.4541	-0.61817	-0.72656
-50.86	-0.5166	-0.40039	-0.39551	-0.58887	-0.67188
-50.76	-0.52441	-0.37305	-0.43652	-0.62988	-0.72656
-50.66	-0.53223	-0.38867	-0.44824	-0.64746	-0.70312
-50.56	-0.5127	-0.37695	-0.41894	-0.61817	-0.70312
-50.46	-0.5166	-0.35742	-0.41895	-0.57715	-0.66407
-50.36	-0.49707	-0.35742	-0.4541	-0.58887	-0.71094
-50.26	-0.48535	-0.35352	-0.43652	-0.58301	-0.6875
-50.16	-0.50488	-0.33008	-0.47754	-0.60059	-0.74219
-50.06	-0.49316	-0.33789	-0.47754	-0.58887	-0.74219
-49.96	-0.47363	-0.31836	-0.44825	-0.60059	-0.6875
-49.86	-0.47363	-0.31836	-0.4541	-0.61817	-0.66406
-49.76	-0.47363	-0.29883	-0.41895	-0.58301	-0.67969
-49.66	-0.43457	-0.27539	-0.41894	-0.58887	-0.64844
-49.56	-0.43457	-0.25977	-0.41894	-0.55957	-0.625
-49.46	-0.39551	-0.24023	-0.36035	-0.53028	-0.64063
-49.36	-0.39551	-0.24023	-0.38965	-0.53027	-0.64844
-49.26	-0.3916	-0.24023	-0.38965	-0.49512	-0.58594
-49.16	-0.37207	-0.23633	-0.36035	-0.49512	-0.58594
-49.06	-0.36816	-0.23633	-0.36035	-0.49512	-0.54688
-48.96	-0.33692	-0.2207	-0.33106	-0.47168	-0.54688
-48.86	-0.33301	-0.20117	-0.32519	-0.43652	-0.52344
-48.76	-0.35254	-0.19727	-0.3252	-0.46582	-0.54688
-48.66	-0.33301	-0.19727	-0.30176	-0.43652	-0.54688
-48.56	-0.33691	-0.18945	-0.30176	-0.43652	-0.58594
-48.46	-0.33692	-0.17773	-0.29004	-0.46582	-0.625
-48.36	-0.33691	-0.20117	-0.27246	-0.44238	-0.58594
-48.26	-0.35254	-0.18164	-0.2959	-0.46582	-0.60938
-48.16	-0.35254	-0.19727	-0.2959	-0.46582	-0.60156
-48.06	-0.35254	-0.20898	-0.30176	-0.4541	-0.66406
-47.96	-0.3252	-0.19727	-0.26074	-0.37793	-0.60938
-47.86	-0.31738	-0.20117	-0.21387	-0.34863	-0.58594
-47.76	-0.31738	-0.18164	-0.18457	-0.34863	-0.59375
-47.66	-0.29395	-0.20117	-0.14941	-0.31348	-0.5625
-47.56	-0.31348	-0.1582	-0.16699	-0.34863	-0.58594
-47.46	-0.35254	-0.1582	-0.17871	-0.34863	-0.66406
-47.36	-0.33691	-0.19727	-0.18457	-0.34863	-0.625
-47.26	-0.33692	-0.17773	-0.18457	-0.33399	-0.66406
-47.16	-0.33691	-0.18164	-0.18457	-0.31348	-0.65625
-47.06	-0.35645	-0.18164	-0.17285	-0.28418	-0.67188
-46.96	-0.36817	-0.17383	-0.18457	-0.28418	-0.67188
-46.86	-0.37598	-0.18945	-0.20801	-0.27832	-0.70312
-46.76	-0.35645	-0.19727	-0.24317	-0.27832	-0.70313
-46.66	-0.37598	-0.20898	-0.27246	-0.28418	-0.74219
-46.56	-0.37598	-0.20117	-0.27246	-0.31348	-0.75
-46.46	-0.37598	-0.2207	-0.29004	-0.25489	-0.75
-46.36	-0.37598	-0.20898	-0.27246	-0.27246	-0.75
-46.26	-0.37988	-0.24023	-0.2666	-0.24317	-0.77344
-46.16	-0.35645	-0.25195	-0.24316	-0.24902	-0.74219
-46.06	-0.35645	-0.24023	-0.27246	-0.2666	-0.77344
-45.96	-0.35645	-0.25977	-0.33106	-0.30176	-0.78906
-45.86	-0.33691	-0.2793	-0.30176	-0.2666	-0.75
-45.76	-0.33692	-0.2793	-0.33692	-0.28418	-0.76563
-45.66	-0.35645	-0.29883	-0.40723	-0.31348	-0.82812
-45.56	-0.35645	-0.31836	-0.39551	-0.31348	-0.78906
-45.46	-0.35645	-0.30273	-0.39551	-0.31348	-0.78906
-45.36	-0.35645	-0.29492	-0.37793	-0.28418	-0.78906
-45.26	-0.37598	-0.2793	-0.37793	-0.30176	-0.8125
-45.16	-0.35645	-0.29102	-0.34277	-0.2373	-0.76562
-45.06	-0.36426	-0.26758	-0.42481	-0.28418	-0.86719
-44.96	-0.36817	-0.29883	-0.44238	-0.27246	-0.85156
-44.86	-0.35645	-0.29102	-0.42481	-0.22559	-0.82812
-44.76	-0.33692	-0.26367	-0.42481	-0.25488	-0.84375
-44.66	-0.36035	-0.2832	-0.42481	-0.28418	-0.875
-44.56	-0.31738	-0.2832	-0.41016	-0.25488	-0.82812
-44.46	-0.31738	-0.25977	-0.375	-0.24024	-0.78906
-44.36	-0.29785	-0.24023	-0.35156	-0.2168	-0.75
-44.26	-0.29785	-0.22852	-0.33106	-0.19629	-0.75
-44.16	-0.29785	-0.26367	-0.36035	-0.19629	-0.75
-44.06	-0.29395	-0.24414	-0.35449	-0.19043	-0.70312
-43.96	-0.30176	-0.25977	-0.38965	-0.20508	-0.70313
-43.86	-0.31348	-0.25977	-0.38965	-0.26074	-0.70312
-43.76	-0.30957	-0.24023	-0.38965	-0.29004	-0.66406
-43.66	-0.28613	-0.26758	-0.37207	-0.27246	-0.6875
-43.56	-0.27832	-0.26758	-0.37793	-0.27832	-0.69531
-43.46	-0.27832	-0.27148	-0.36035	-0.27539	-0.67188
-43.36	-0.27441	-0.25977	-0.35449	-0.26367	-0.66406
-43.26	-0.27442	-0.25977	-0.37793	-0.29004	-0.70313
-43.16	-0.30176	-0.25977	-0.38379	-0.31641	-0.71875
-43.06	-0.29395	-0.27539	-0.38965	-0.29883	-0.71094
-42.96	-0.29785	-0.2793	-0.38965	-0.34863	-0.71094
-42.86	-0.29785	-0.29883	-0.36035	-0.34863	-0.73438
-42.76	-0.27832	-0.29883	-0.33106	-0.31934	-0.6875
-42.66	-0.25488	-0.28711	-0.32519	-0.34863	-0.70312
-42.56	-0.24316	-0.27539	-0.2959	-0.31934	-0.64844
-42.46	-0.25488	-0.23633	-0.2959	-0.34863	-0.625
-42.36	-0.25488	-0.24805	-0.30176	-0.34863	-0.625
-42.26	-0.23535	-0.24023	-0.27246	-0.31934	-0.59375
-42.16	-0.23535	-0.2207	-0.30176	-0.31934	-0.59375
-42.06	-0.21191	-0.20117	-0.2666	-0.34863	-0.58594
-41.96	-0.21582	-0.20508	-0.28125	-0.31934	-0.58594
-41.86	-0.19629	-0.19727	-0.30176	-0.26074	-0.50781
-41.76	-0.2041	-0.17773	-0.25488	-0.27246	-0.5
-41.66	-0.22363	-0.16602	-0.27246	-0.29004	-0.53125
-41.56	-0.21191	-0.1582	-0.24316	-0.25488	-0.51562
-41.46	-0.21192	-0.13477	-0.24317	-0.25488	-0.54688
-41.36	-0.23145	-0.13477	-0.24316	-0.2666	-0.58594
-41.26	-0.21973	-0.13477	-0.26074	-0.30762	-0.55469
-41.16	-0.19629	-0.10742	-0.21387	-0.29004	-0.50781
-41.06	-0.19629	-0.10742	-0.24316	-0.29004	-0.52344
-40.96	-0.21582	-0.11133	-0.24317	-0.29004	-0.58594
-40.86	-0.22363	-0.10742	-0.24316	-0.29004	-0.59375
-40.76	-0.23145	-0.11914	-0.17871	-0.25489	-0.54688
-40.66	-0.23535	-0.07617	-0.21387	-0.25488	-0.54688
-40.56	-0.25488	-0.07617	-0.24316	-0.28418	-0.64062
-40.46	-0.25488	-0.0957	-0.24317	-0.2959	-0.625
-40.36	-0.25488	-0.07617	-0.21387	-0.29004	-0.58594
-40.26	-0.27441	-0.05664	-0.27246	-0.34863	-0.66406
-40.16	-0.28223	-0.0957	-0.27246	-0.31934	-0.66406
-40.06	-0.31738	-0.07617	-0.27832	-0.37793	-0.67188
-39.96	-0.27442	-0.06641	-0.24317	-0.34278	-0.625
-39.86	-0.27441	-0.06055	-0.27246	-0.34277	-0.625
-39.76	-0.29395	-0.04102	-0.27246	-0.37793	-0.66406
-39.66	-0.29395	-0.04102	-0.27246	-0.37793	-0.625
-39.56	-0.27441	-0.02148	-0.24316	-0.34863	-0.625
-39.46	-0.28223	-0.00195	-0.29004	-0.36035	-0.64062
-39.36	-0.28613	-0.00977	-0.2959	-0.36621	-0.65625
-39.26	-0.29395	-0.02148	-0.27246	-0.34278	-0.625
-39.16	-0.29395	0.001953	-0.27246	-0.34277	-0.625
-39.06	-0.27441	0.021484	-0.24316	-0.31934	-0.58594
-38.96	-0.29395	0.021484	-0.24317	-0.31934	-0.58594
-38.86	-0.28613	0.041016	-0.24316	-0.31934	-0.58594
-38.76	-0.27442	0.041016	-0.25488	-0.31934	-0.58594
-38.66	-0.2627	0.060547	-0.24316	-0.26074	-0.54688
-38.56	-0.24316	0.076172	-0.27246	-0.28418	-0.54688
-38.46	-0.25488	0.072266	-0.31348	-0.2959	-0.54688
-38.36	-0.2627	0.041016	-0.33106	-0.30176	-0.50781
-38.26	-0.28613	0.060547	-0.36035	-0.2666	-0.50782
-38.16	-0.29395	0.041016	-0.36035	-0.28418	-0.50781
-38.06	-0.31348	0.048828	-0.36035	-0.28418	-0.50781
-37.96	-0.30957	0.041016	-0.3545	-0.24317	-0.49219
-37.86	-0.28613	0.044922	-0.34863	-0.24316	-0.44531
-37.76	-0.29785	0.029297	-0.36621	-0.29004	-0.50781
-37.66	-0.28613	0.025391	-0.34863	-0.30176	-0.46094
-37.56	-0.28223	0.048828	-0.31348	-0.25488	-0.42188
-37.46	-0.28613	0.080078	-0.33106	-0.28418	-0.42188
-37.36	-0.27441	0.060547	-0.36035	-0.2666	-0.46875
-37.26	-0.27442	0.060547	-0.36621	-0.31934	-0.46875
-37.16	-0.27832	0.056641	-0.36621	-0.29004	-0.42969
-37.06	-0.25488	0.076172	-0.36035	-0.28418	-0.42188
-36.96	-0.25488	0.060547	-0.36035	-0.28418	-0.42188
-36.86	-0.23535	0.070313	-0.33106	-0.24316	-0.35938
-36.76	-0.22754	0.083984	-0.31934	-0.24317	-0.36719
-36.66	-0.21582	0.091797	-0.33106	-0.23145	-0.34375
-36.56	-0.21582	0.123047	-0.33692	-0.20215	-0.30469
-36.46	-0.23535	0.119141	-0.34863	-0.20215	-0.3125
-36.36	-0.23145	0.119141	-0.36621	-0.20215	-0.3125
-36.26	-0.21582	0.119141	-0.38965	-0.22559	-0.30469
-36.16	-0.19629	0.123047	-0.33106	-0.19629	-0.30469
-36.06	-0.18457	0.123047	-0.33106	-0.1377	-0.26563
-35.96	-0.20801	0.162109	-0.31934	-0.12598	-0.21094
-35.86	-0.17676	0.169922	-0.31934	-0.12012	-0.24219
-35.76	-0.17676	0.150391	-0.36621	-0.1377	-0.27344
-35.66	-0.16504	0.138672	-0.34863	-0.12598	-0.25
-35.56	-0.15723	0.150391	-0.31348	-0.0791	-0.22656
-35.46	-0.16504	0.142578	-0.37207	-0.09082	-0.28125
-35.36	-0.17676	0.154297	-0.38965	-0.1084	-0.30469
-35.26	-0.17676	0.123047	-0.38965	-0.1084	-0.30469
-35.16	-0.18457	0.123047	-0.39551	-0.12012	-0.30469
-35.06	-0.19629	0.123047	-0.39551	-0.1377	-0.30469
-34.96	-0.21582	0.119141	-0.42481	-0.15527	-0.35156
-34.86	-0.21582	0.099609	-0.42481	-0.1377	-0.39063
-34.76	-0.21192	0.099609	-0.38965	-0.1377	-0.38281
-34.66	-0.21582	0.111328	-0.40137	-0.1377	-0.34375
-34.56	-0.21582	0.103516	-0.44824	-0.16699	-0.32813
-34.46	-0.21582	0.103516	-0.44825	-0.16699	-0.30469
-34.36	-0.21582	0.103516	-0.44824	-0.16699	-0.34375
-34.26	-0.23535	0.099609	-0.4834	-0.19629	-0.39063
-34.16	-0.23535	0.080078	-0.4834	-0.23145	-0.42969
-34.06	-0.23535	0.060547	-0.4834	-0.20215	-0.42969
-33.96	-0.23535	0.080078	-0.4834	-0.23145	-0.42969
-33.86	-0.25879	0.068359	-0.54199	-0.29004	-0.50781
-33.76	-0.2666	0.060547	-0.52442	-0.29004	-0.46875
-33.66	-0.24707	0.037109	-0.56543	-0.28418	-0.50781
-33.56	-0.21582	0.041016	-0.54199	-0.25488	-0.42969
-33.46	-0.25488	0.060547	-0.57129	-0.28418	-0.52344
-33.36	-0.25488	0.013672	-0.54199	-0.25488	-0.54688
-33.26	-0.23535	0.001953	-0.5127	-0.23145	-0.50782
-33.16	-0.27832	0.009766	-0.54199	-0.26074	-0.54688
-33.06	-0.25098	0.001953	-0.53027	-0.24902	-0.53125
-32.96	-0.23926	0.005859	-0.5127	-0.23145	-0.54688
-32.86	-0.25879	0.017578	-0.54199	-0.27246	-0.59375
-32.76	-0.23535	-0.00195	-0.47754	-0.25489	-0.50782
-32.66	-0.24512	0.001953	-0.49219	-0.29883	-0.56641
-32.56	-0.23145	-0.00781	-0.44238	-0.24902	-0.55469
-32.46	-0.24121	0.005859	-0.46289	-0.26953	-0.58203
-32.36	-0.2627	-0.00391	-0.4541	-0.29004	-0.60156
-32.26	-0.29395	-0.04102	-0.4834	-0.34863	-0.625
-32.16	-0.28809	-0.08008	-0.46875	-0.33398	-0.64453
-32.06	-0.25488	-0.07031	-0.44824	-0.31348	-0.57812
-31.96	-0.26465	-0.08398	-0.46289	-0.35742	-0.60547
-31.86	-0.26465	-0.10547	-0.46289	-0.36328	-0.60547
-31.76	-0.21192	-0.10938	-0.42774	-0.31348	-0.53907
-31.66	-0.23926	-0.07617	-0.47754	-0.34277	-0.57812
-31.56	-0.22363	-0.11523	-0.43359	-0.31348	-0.53906
-31.46	-0.24121	-0.11523	-0.41309	-0.35742	-0.5586
-31.36	-0.2627	-0.13281	-0.45996	-0.34863	-0.58594
-31.26	-0.26856	-0.17773	-0.44531	-0.33399	-0.56641
-31.16	-0.23535	-0.18359	-0.39551	-0.31348	-0.5
-31.06	-0.21191	-0.1582	-0.36035	-0.27832	-0.46094
-30.96	-0.21191	-0.1543	-0.36035	-0.28418	-0.48047
-30.86	-0.21191	-0.17383	-0.36035	-0.28418	-0.48828
-30.76	-0.19238	-0.1543	-0.33106	-0.25489	-0.42188
-30.66	-0.21191	-0.13477	-0.36035	-0.2959	-0.5
-30.56	-0.21191	-0.17773	-0.33106	-0.31348	-0.42188
-30.46	-0.21191	-0.16602	-0.33106	-0.33106	-0.48047
-30.36	-0.19238	-0.19727	-0.30176	-0.27832	-0.46094
-30.26	-0.21191	-0.17383	-0.33106	-0.31348	-0.5
-30.16	-0.23145	-0.19336	-0.375	-0.32813	-0.56641
-30.06	-0.22949	-0.22266	-0.32227	-0.30469	-0.53516
-29.96	-0.23535	-0.21094	-0.27246	-0.28418	-0.46875
-29.86	-0.22559	-0.19727	-0.27246	-0.2959	-0.46875
-29.76	-0.19824	-0.20703	-0.23731	-0.27832	-0.46094
-29.66	-0.21191	-0.19727	-0.2373	-0.24902	-0.47656
-29.56	-0.19238	-0.16797	-0.20801	-0.24902	-0.5
-29.46	-0.19629	-0.17383	-0.17871	-0.25489	-0.46875
-29.36	-0.19629	-0.1543	-0.18457	-0.22559	-0.48438
-29.26	-0.19629	-0.1543	-0.18457	-0.22559	-0.50781
-29.16	-0.19629	-0.1543	-0.16699	-0.19629	-0.46875
-29.06	-0.18457	-0.13867	-0.1377	-0.20801	-0.44531
-28.96	-0.18067	-0.12695	-0.13184	-0.20215	-0.4375
-28.86	-0.17285	-0.12305	-0.12012	-0.21973	-0.46094
-28.76	-0.19629	-0.14453	-0.14941	-0.27832	-0.5
-28.66	-0.19629	-0.1582	-0.19043	-0.24902	-0.52344
-28.56	-0.18848	-0.1582	-0.16699	-0.24316	-0.53125
-28.46	-0.17676	-0.16992	-0.14942	-0.22559	-0.46875
-28.36	-0.15723	-0.1582	-0.12012	-0.19629	-0.44531
-28.26	-0.17676	-0.14258	-0.15527	-0.22559	-0.50781
-28.16	-0.15332	-0.16211	-0.12012	-0.16113	-0.46094
-28.06	-0.17285	-0.13867	-0.14941	-0.21973	-0.46094
-27.96	-0.17676	-0.1582	-0.16113	-0.21973	-0.47656
-27.86	-0.15723	-0.1582	-0.17871	-0.21973	-0.5
-27.76	-0.16895	-0.16602	-0.19629	-0.21387	-0.48438
-27.66	-0.1377	-0.16211	-0.14941	-0.17871	-0.42188
-27.56	-0.1377	-0.11914	-0.12012	-0.19629	-0.46875
-27.46	-0.15723	-0.12305	-0.15527	-0.22559	-0.50781
-27.36	-0.13379	-0.14258	-0.14941	-0.21973	-0.5
-27.26	-0.13379	-0.1582	-0.14942	-0.21973	-0.51563
-27.16	-0.13379	-0.1582	-0.14941	-0.21973	-0.5
-27.06	-0.13379	-0.1582	-0.14941	-0.24902	-0.53906
-26.96	-0.13379	-0.1582	-0.14942	-0.25488	-0.5
-26.86	-0.17676	-0.1582	-0.17871	-0.25488	-0.53906
-26.76	-0.17676	-0.17773	-0.17871	-0.25488	-0.53906
-26.66	-0.17676	-0.17773	-0.17871	-0.25488	-0.5
-26.56	-0.17285	-0.18164	-0.16113	-0.2666	-0.52344
-26.46	-0.22754	-0.18945	-0.21387	-0.31348	-0.625
-26.36	-0.19629	-0.24023	-0.18457	-0.25488	-0.54688
-26.26	-0.18457	-0.2207	-0.14942	-0.23731	-0.52344
-26.16	-0.17676	-0.20898	-0.12012	-0.21973	-0.5
-26.06	-0.17676	-0.19727	-0.12012	-0.21973	-0.5
-25.96	-0.19238	-0.19727	-0.13184	-0.20215	-0.47656
-25.86	-0.20801	-0.20898	-0.1377	-0.20801	-0.48438
-25.76	-0.21582	-0.23242	-0.13184	-0.17285	-0.47656
-25.66	-0.18848	-0.22852	-0.1377	-0.18457	-0.49219
-25.56	-0.17676	-0.23242	-0.09082	-0.1377	-0.42969
-25.46	-0.17285	-0.2207	-0.08496	-0.10254	-0.46094
-25.36	-0.13379	-0.19727	-0.06738	-0.07324	-0.38281
-25.26	-0.1377	-0.17773	-0.05567	-0.07324	-0.38281
-25.16	-0.1377	-0.20117	-0.09082	-0.10254	-0.42188
-25.06	-0.1377	-0.20117	-0.09082	-0.10254	-0.38281
-24.96	-0.1377	-0.20117	-0.06152	-0.13184	-0.38281
-24.86	-0.1377	-0.20117	-0.06152	-0.14355	-0.34375
-24.76	-0.1377	-0.20117	-0.07324	-0.13184	-0.34375
-24.66	-0.10645	-0.18164	-0.06152	-0.12012	-0.29688
-24.56	-0.0752	-0.16992	-0.00879	-0.07324	-0.25781
-24.46	-0.0752	-0.13867	-0.02637	-0.07324	-0.25781
-24.36	-0.05566	-0.13867	-0.02637	-0.07324	-0.26563
-24.26	-0.05566	-0.13867	0.002929	-0.04395	-0.26563
-24.16	-0.05566	-0.11914	-0.00293	-0.04395	-0.26563
-24.06	-0.01855	-0.11914	0.008789	-0.00293	-0.25
-23.96	-0.0166	-0.11523	0.026365	0.014647	-0.1875
-23.86	-0.04395	-0.10352	-0.01465	0.00293	-0.24219
-23.76	-0.05176	-0.13086	-0.02637	-0.02051	-0.25781
-23.66	-0.05176	-0.11914	-0.00879	-0.07324	-0.21875
-23.56	-0.03223	-0.11914	-0.02637	-0.07324	-0.23828
-23.46	-0.03223	-0.11914	-0.02637	-0.04395	-0.26563
-23.36	-0.05176	-0.09961	-0.02637	-0.04395	-0.22656
-23.26	-0.03223	-0.09961	-0.03223	-0.05859	-0.23438
-23.16	-0.03613	-0.09961	-0.03223	-0.0791	-0.23438
-23.06	-0.00488	-0.09961	0.00293	-0.04395	-0.14844
-22.96	-0.02051	-0.05664	0.032225	-0.04395	-0.14844
-22.86	-0.05176	-0.03711	0.00293	-0.08496	-0.14844
-22.76	-0.03223	-0.06055	0.032225	-0.07324	-0.10938
-22.66	-0.05176	-0.04102	0.032227	-0.0791	-0.07031
-22.56	-0.03613	-0.04102	0.09082	-0.02051	-0.03125
-22.46	-0.00879	-0.00195	0.090819	-0.02051	-0.03125
-22.36	-0.00098	-0.00195	0.09668	-0.01465	0.015625
-22.26	-0.0127	0.001953	0.096679	-0.01465	-1.4e-06
-22.16	-0.02051	0.001953	0.114258	-0.00879	-0.03906
-22.06	-0.03223	0.005859	0.120117	-0.01465	-0.03125
-21.96	-0.0127	0.001953	0.105468	-0.01465	-0.03125
-21.86	-0.03223	0.021484	0.114258	-0.01465	-0.03125
-21.76	-0.0127	0.041016	0.114257	-0.04981	0.007811
-21.66	-0.0127	0.041016	0.114258	-0.06152	0.023438
-21.56	-0.0127	0.037109	0.114258	-0.09668	-0.00781
-21.46	-0.0127	0.037109	0.120116	-0.04395	-0.02344
-21.36	-0.02246	0.041016	0.108398	-0.04395	-0.02344
-21.26	-0.03613	0.052734	0.032227	-0.07324	-0.0625
-21.16	-0.0166	0.041016	0.055664	-0.04395	0.015625
-21.06	-0.03613	0.060547	0.026367	-0.07324	-0.02344
-20.96	-0.03613	0.041016	0.055663	-0.12012	-0.03125
-20.86	-0.02441	0.060547	0.114258	-0.1084	0.007813
-20.76	-0.03613	0.080078	0.114257	-0.1084	0.046874
-20.66	-0.04785	0.080078	0.09668	-0.09668	0.023438
-20.56	-0.04395	0.060547	0.137695	-0.08496	0.023438
-20.46	-0.06348	0.056641	0.108398	-0.10254	0.015625
-20.36	-0.06738	0.044922	0.073242	-0.09082	-0.00781
-20.26	-0.05567	0.029297	0.090818	-0.07324	0.015623
-20.16	-0.05566	0.041016	0.079102	-0.07324	0
-20.06	-0.03613	0.033203	0.055664	-0.04395	-0.02344
-19.96	-0.05566	0.021484	0.026367	-0.07324	-0.02344
-19.86	-0.04785	0.001953	0.067383	-0.06152	-0.01563
-19.76	-0.03613	0.009766	0.114256	-0.04981	0.00781
-19.66	-0.08691	0.013672	0.084961	-0.0791	-0.04688
-19.56	-0.09863	-0.01758	0.073242	-0.0498	-0.07031
-19.46	-0.09473	-0.02148	0.061522	-0.08496	-0.0625
-19.36	-0.09473	-0.01758	0.061523	-0.13184	-0.10156
-19.26	-0.09473	-0.02539	0.061523	-0.13184	-0.07813
-19.16	-0.0752	-0.03711	0.061523	-0.13184	-0.10156
-19.06	-0.0752	-0.03711	0.032227	-0.16113	-0.10156
-18.96	-0.05566	-0.06445	0.032225	-0.13184	-0.10156
-18.86	-0.04395	-0.07617	0.026367	-0.10254	-0.10938
-18.76	-0.05566	-0.07617	0.043944	-0.12012	-0.10938
-18.66	-0.06348	-0.07617	0.026367	-0.1084	-0.125
-18.56	-0.06348	-0.08008	0.043945	-0.0791	-0.125
-18.46	-0.05176	-0.06836	0.061523	-0.04395	-0.10156
-18.36	-0.07129	-0.08398	0.032227	-0.04395	-0.15625
-18.26	-0.05176	-0.11523	0.061523	-0.08496	-0.17969
-18.16	-0.06738	-0.11523	0.049805	-0.11426	-0.19531
-18.06	-0.07129	-0.12305	0.061523	-0.13184	-0.21875
-17.96	-0.07129	-0.13477	0.032227	-0.16113	-0.25781
-17.86	-0.0752	-0.13477	0.00293	-0.16113	-0.21875
-17.76	-0.06348	-0.14453	0.032225	-0.19629	-0.22656
-17.66	-0.0752	-0.13867	0.061523	-0.20801	-0.22656
-17.56	-0.0752	-0.13867	0.026367	-0.25488	-0.26563
-17.46	-0.07715	-0.16211	0.038084	-0.24317	-0.25
-17.36	-0.05566	-0.13477	0.061523	-0.19043	-0.21875
-17.26	-0.05566	-0.12695	0.090819	-0.17871	-0.19922
-17.16	-0.03613	-0.11914	0.049805	-0.16113	-0.22656
-17.06	-0.02441	-0.11914	0.049805	-0.17285	-0.20313
-16.96	-0.02441	-0.13477	0.032226	-0.19043	-0.22656
-16.86	-0.05566	-0.1582	-0.02637	-0.2373	-0.22656
-16.76	-0.03613	-0.17773	-0.00879	-0.24317	-0.22656
-16.66	-0.03613	-0.16602	-0.03223	-0.2373	-0.23438
-16.56	-0.00098	-0.17773	0.00293	-0.17871	-0.1875
-16.46	-0.0127	-0.1543	0.00293	-0.20215	-0.22656
-16.36	-0.0127	-0.17773	0.00293	-0.21973	-0.20313
-16.26	0.006835	-0.1582	0.002929	-0.21973	-0.21094
-16.16	-0.0127	-0.1582	0.00293	-0.24902	-0.20313
-16.06	-0.02441	-0.17773	0.00293	-0.21973	-0.22656
-15.96	0.002928	-0.16602	0.032225	-0.19043	-0.1875
-15.86	0.014648	-0.1582	0.020508	-0.20801	-0.20313
-15.76	0.02246	-0.14648	0.073241	-0.22559	-0.1875
-15.66	0.018555	-0.11914	0.09668	-0.19043	-0.14063
-15.56	0.026367	-0.11523	0.09668	-0.19043	-0.16406
-15.46	0.026366	-0.0957	0.090819	-0.19043	-0.14844
-15.36	0.061523	-0.0957	0.155273	-0.17871	-0.14844
-15.26	0.077147	-0.06836	0.161131	-0.14356	-0.10938
-15.16	0.09668	-0.05664	0.18457	-0.11426	-0.08594
-15.06	0.116211	-0.02539	0.18457	-0.06738	-0.02344
-14.96	0.127929	-0.01367	0.213866	-0.03809	-0.02344
-14.86	0.147461	-0.01758	0.225586	0.00293	-0.00781
-14.76	0.186522	0.009766	0.260739	0.079099	0.093746
-14.66	0.198242	0.041016	0.202148	0.052734	0.078125
-14.56	0.166992	0.052734	0.196289	0.014648	0
-14.46	0.182616	0.041016	0.243162	0.008787	0.054684
-14.36	0.163086	0.033203	0.208008	0.008789	0.015625
-14.26	0.186523	0.021484	0.243163	0.043944	0.062498
-14.16	0.186523	0.044922	0.243164	0.032227	0.0625
-14.06	0.186523	0.044922	0.243164	0.014648	0.101562
-13.96	0.178711	0.044922	0.231445	0.032226	0.124999
-13.86	0.147461	0.056641	0.18457	-0.01465	0.101562
-13.76	0.14746	0.025391	0.213866	-0.00293	0.093748
-13.66	0.147461	0.044922	0.213867	0.032227	0.117188
-13.56	0.137695	0.044922	0.199219	0	0.113281
-13.46	0.120117	0.035156	0.178711	0.008789	0.085937
-13.36	0.131836	0.017578	0.172852	0.038086	0.085938
-13.26	0.100586	0.017578	0.143555	0.008789	0.046875
-13.16	0.114258	-0.00195	0.193359	0.058594	0.113281
-13.06	0.12793	0.011719	0.213867	0.079102	0.140625
-12.96	0.127929	0.025391	0.225585	0.0791	0.140624
-12.86	0.12793	0.025391	0.243164	0.108398	0.179688
-12.76	0.127929	0.025391	0.243163	0.102538	0.179686
-12.66	0.120117	0.025391	0.243164	0.102539	0.179688
-12.56	0.12793	0.021484	0.272461	0.131836	0.21875
-12.46	0.104492	0.021484	0.231445	0.09082	0.171875
-12.36	0.104492	0.001953	0.213867	0.073242	0.171875
-12.26	0.092773	0.001953	0.225586	0.055664	0.148437
-12.16	0.108398	-0.00977	0.243164	0.079102	0.179688
-12.06	0.108398	0.005859	0.243164	0.067383	0.203125
-11.96	0.081055	0.005859	0.18457	0.020508	0.140625
-11.86	0.077148	-0.01367	0.213867	0.049805	0.101562
-11.76	0.069336	-0.01758	0.172852	0.014648	0.046875
-11.66	0.100586	-0.01758	0.155273	0.043945	0.054688
-11.56	0.06543	0.001953	0.155273	0.014648	0.054688
-11.46	0.065429	-0.03711	0.155272	0.032225	0.054686
-11.36	0.038086	-0.01758	0.149414	0.014648	0.054688
-11.26	0.045898	-0.01758	0.120116	0.014647	0.054686
-11.16	0.049805	-0.04492	0.125977	0.049805	0.0625
-11.06	0.030273	-0.05273	0.09668	0.020508	0.0625
-10.96	0.010742	-0.04492	0.067383	-0.02051	0.023438
-10.86	0.010742	-0.05273	0.038086	-0.03809	0.007813
-10.76	0.010741	-0.0332	0.067382	-0.04395	0.023436
-10.66	0.006836	-0.03711	0.061523	-0.04395	-0.01563
-10.56	0.006836	-0.03711	0.032227	-0.04395	0.023438
-10.46	-0.00488	-0.03711	-0.01465	-0.06152	-0.00781
-10.36	-0.03223	-0.04883	-0.02637	-0.04395	-0.02344
-10.26	-0.0127	-0.05664	0.002929	-0.07324	-0.02344
-10.16	-0.03223	-0.05664	0.00293	-0.07324	-0.02344
-10.06	0.006836	-0.03711	0.00293	-0.01465	0.054688
-9.96	-0.0127	-0.01758	-0.03223	-0.04395	0.054688
-9.86	-0.0127	-0.03711	0.00293	-0.03809	0.0625
-9.76	-0.0127	-0.01367	0.002929	-0.00879	0.062498
-9.66	-0.00488	-0.01758	-0.01465	-0.00293	0.078125
-9.56001	-0.0127	-0.00977	0.00293	0.014648	0.0625
-9.46	-0.00098	-0.01758	0.002929	0.020507	0.085937
-9.36	0.014648	-0.02539	-0.01465	0.026367	0.070312
-9.26	-0.00098	-0.00977	-0.00879	0.061522	0.078123
-9.16	-0.0127	-0.01367	-0.04395	0.043945	0.054688
-9.06001	-0.03223	-0.01758	-0.0791	0.014648	0.015625
-8.96	-0.0127	-0.03711	-0.07324	0.014647	-0.02344
-8.86	-0.03613	-0.03711	-0.1084	0.00293	-0.0625
-8.76	-0.05176	-0.03711	-0.08496	-0.00879	-0.05469
-8.66	-0.03223	-0.01367	-0.08496	-0.00879	-0.0625
-8.56001	-0.03223	-0.01367	-0.08496	-0.00879	-0.0625
-8.46	-0.05176	-0.01758	-0.11426	-0.00879	-0.10156
-8.36	-0.05176	-0.01758	-0.12012	-0.00879	-0.10156
-8.26	-0.05176	-0.01758	-0.12012	0.005858	-0.0625
-8.16	-0.07129	-0.00586	-0.17871	-0.01465	-0.08594
-8.06001	-0.07129	-0.03711	-0.17871	-0.02051	-0.10156
-7.96	-0.09473	-0.01758	-0.14942	-0.02051	-0.10156
-7.86	-0.11426	-0.01758	-0.17871	-0.0498	-0.15625
-7.76	-0.11426	-0.03711	-0.20801	-0.02051	-0.14063
-7.66	-0.08301	-0.01758	-0.16113	0.055664	-0.08594
-7.56001	-0.09863	0.013672	-0.17871	0.061523	-0.07813
-7.46001	-0.12207	0.017578	-0.17871	0.055664	-0.04688
-7.36	-0.09082	0.013672	-0.17871	0.102536	-0.02344
-7.26	-0.11426	0.035156	-0.20801	0.061523	-0.04688
-7.16	-0.11426	0.001953	-0.20801	0.043945	0.015625
-7.06001	-0.11426	0.001953	-0.20801	0.043945	0.015625
-6.96001	-0.13379	0.021484	-0.2373	0.014648	-0.03906
-6.86	-0.12598	0.021484	-0.23731	0.020505	-0.04688
-6.76	-0.11426	0.025391	-0.20801	0.038086	-0.02344
-6.66	-0.11426	0.048828	-0.24316	0.008789	-0.0625
-6.56001	-0.13379	0.017578	-0.20215	0.008789	-0.07031
-6.46001	-0.11035	0.017578	-0.17871	0.014648	-0.0625
-6.36	-0.11426	0.021484	-0.17871	0.014646	-0.08203
-6.26	-0.10645	0.041016	-0.14941	-0.01465	-0.10938
-6.16	-0.15332	0.041016	-0.20801	-0.07324	-0.14844
-6.06001	-0.13379	0.001953	-0.20801	-0.04395	-0.14844
-5.96001	-0.16113	0.001953	-0.2373	-0.0791	-0.1875
-5.86	-0.17285	0.001953	-0.23731	-0.0791	-0.1875
-5.76	-0.15332	0.001953	-0.22559	-0.0791	-0.16797
-5.66	-0.14551	-0.00977	-0.22559	-0.1084	-0.14844
-5.56001	-0.14551	-0.00195	-0.24902	-0.09668	-0.17188
-5.46001	-0.12598	0.005859	-0.21387	-0.0791	-0.14844
-5.36	-0.10254	0.044922	-0.21387	-0.06152	-0.14844
-5.26	-0.15723	0.048828	-0.24316	-0.12598	-0.22656
-5.16	-0.16895	0.017578	-0.27246	-0.14355	-0.22656
-5.06001	-0.18457	0.017578	-0.28418	-0.21387	-0.28125
-4.96001	-0.17285	-0.00977	-0.25488	-0.24023	-0.29688
-4.86	-0.16504	-0.01758	-0.2666	-0.21973	-0.24219
-4.76	-0.19238	-0.01758	-0.2666	-0.26367	-0.21875
-4.66	-0.15332	-0.03711	-0.30176	-0.28418	-0.21875
-4.56001	-0.17285	-0.01758	-0.29004	-0.31934	-0.26563
-4.46001	-0.15332	-0.01758	-0.27246	-0.30469	-0.25
-4.36	-0.15332	-0.04102	-0.30176	-0.32813	-0.22656
-4.26	-0.16895	-0.06055	-0.34277	-0.33398	-0.22656
-4.16	-0.14941	-0.06055	-0.30762	-0.36035	-0.25
-4.06001	-0.09863	-0.07227	-0.24316	-0.34277	-0.21094
-3.96001	-0.05566	-0.08008	-0.16113	-0.31348	-0.15625
-3.86	-0.10254	-0.05664	-0.17871	-0.34277	-0.26563
-3.76	-0.10645	-0.06836	-0.14941	-0.34277	-0.30469
-3.66	-0.12598	-0.08008	-0.12012	-0.37207	-0.30469
-3.56001	-0.12988	-0.08789	-0.08496	-0.39551	-0.3125
-3.46001	-0.14355	-0.08984	-0.04688	-0.38965	-0.36719
-3.36	-0.14551	-0.06445	-0.01466	-0.30176	-0.25001
-3.26	-0.12598	-0.0293	-0.09082	-0.28418	-0.1875
-3.16	-0.1377	-0.00977	-0.15527	-0.25488	-0.15625
-3.06001	-0.16504	0.025391	-0.25488	-0.24023	-0.12109
-2.96001	-0.15723	0.005859	-0.34277	-0.17871	-0.14844
-2.86	-0.1416	0.017578	-0.38965	-0.20215	-0.19532
-2.76	-0.18652	0.033203	-0.43359	-0.19336	-0.19141
-2.66	-0.19629	0.019531	-0.4541	-0.16699	-0.20313
-2.56001	-0.17676	0.041016	-0.39551	-0.20801	-0.1875
-2.46001	-0.2041	0.078125	-0.43652	-0.2666	-0.28125
-2.36	-0.20215	0.056641	-0.44239	-0.29005	-0.25782
-2.26	-0.2334	-0.0293	-0.38965	-0.21094	-0.12891
-2.16	-0.22363	0.050781	-0.35449	-0.16406	-0.08203
-2.06001	-0.2041	0.091797	-0.40137	-0.25488	-0.07813
-1.96001	-0.28809	0.074219	-0.4541	-0.31934	-0.15625
-1.86	-0.25683	0.056641	-0.31933	-0.27539	-0.03124
-1.76	-0.23145	0.074219	-0.37207	-0.22852	0.023438
-1.66	-0.19238	0.091797	-0.24316	-0.06738	0.046875
-1.56001	-0.1709	0.201172	-0.26367	-0.08789	-0.01953
-1.46001	-0.19629	0.15625	-0.33106	-0.17578	-0.07813
-1.36	-0.17479	0.099609	-0.31346	-0.13475	-0.14841
-1.26	-0.20996	0.101563	-0.36035	-0.18457	-0.20313
-1.16	-0.22363	0.134766	-0.34277	-0.30762	-0.28125
-1.06001	-0.17676	0.111328	-0.38965	-0.25781	-0.29688
-0.960007	-0.25488	0.056641	-0.42481	-0.33106	-0.41797
-0.860001	-0.29004	0.003906	-0.27246	-0.21972	-0.36328
-0.760002	-0.73145	0.085938	-0.80567	-0.84375	-1.10156
-0.660004	-0.84863	-0.28418	-0.23145	-1.81494	-2.15625
-0.560005	-0.43945	-0.10547	0.518556	-1.8999	-0.49024
-0.460007	-0.09668	-0.03125	1.10303	-0.17578	-0.14841
-0.360001	0.180624	0.27832	1.46039	-0.13475	-0.20313
-0.260002	0.161133	0.551758	1.23486	-0.18457	-0.28125
-0.160004	0.129883	0.422852	0.927246	-0.30762	-0.29688
-0.0600052	0.202148	0.34668	0.962403	-0.25781	-0.41797
0.0399933	0.626954	0.430664	1.26562	-0.33106	-0.36328
0.139999	0.79979	0.80664	1.13377	-0.21972	-2.15625
0.239998	0.271484	0.728516	-0.73975	-0.84375	-0.87891
0.339996	-0.56348	-0.24121	-2.12109	-0.17578	-0.78906
0.439995	-0.4248	-0.62109	-2.15332	-0.13475	-0.60157
0.539993	-0.44629	-0.55664	-2.48731	-0.18457	-0.55469
0.639999	-0.41308	-0.6582	-2.64843	-0.30762	-0.39844
0.739998	-0.37207	-0.66602	-2.62793	-0.25781	-0.30469
0.839996	-0.34863	-0.63477	-2.60449	-0.33106	-0.11719
0.939995	-0.34473	-0.61523	-2.60156	-0.21972	-2.9e-06
1.03999	-0.33301	-0.57617	-2.56348	-0.84375	0.140625
1.14	-0.35645	-0.55664	-2.58692	-0.17578	0.28125
1.24	-0.36426	-0.52539	-2.52246	-0.13475	0.375
1.34	-0.35645	-0.50195	-2.55176	-0.18457	0.445312
1.43999	-0.34863	-0.43359	-2.51953	-0.30762	0.542968
1.53999	-0.3252	-0.4707	-2.5459	-0.25781	0.6875
1.64	-0.31543	-0.41797	-2.48731	-0.33106	-0.87891
1.74	-0.30957	-0.3457	-2.46973	-0.21972	-0.78906
1.84	-0.33887	-0.38281	-2.52832	-0.84375	-0.60157
1.93999	-0.36816	-0.45508	-2.52832	-0.17578	-0.55469
2.03999	-0.3916	-0.48633	-2.48731	-0.13475	-0.39844
2.14	-0.41504	-0.4707	-2.51367	-0.18457	-0.30469
2.24	-0.36035	-0.4668	-2.50488	-0.30762	-0.11719
2.34	-0.38379	-0.43945	-2.49317	-0.25781	-2.9e-06
2.43999	-0.40723	-0.42773	-2.53418	-0.33106	0.140625
2.53999	-0.41504	-0.45898	-2.5166	-0.21972	0.28125
2.64	-0.44238	-0.4668	-2.53418	-0.84375	0.375
2.74	-0.4541	-0.44727	-2.50488	-0.17578	0.445312
2.84	-0.44629	-0.4668	-2.49317	-0.13475	0.542968
2.93999	-0.3916	-0.47852	-2.40527	-0.18457	0.6875
3.03999	-0.43457	-0.46289	-2.43457	-0.30762	-0.87891
3.14	-0.39551	-0.47461	-2.37891	-0.25781	-0.78906
3.24	-0.40332	-0.46289	-2.35254	-0.33106	-0.60157
3.34	-0.40723	-0.4668	-2.35254	-0.21972	-0.55469
3.43999	-0.41504	-0.45508	-2.36426	-0.84375	-0.39844
3.53999	-0.41504	-0.47852	-2.35254	-0.17578	-0.30469
3.64	-0.43457	-0.4668	-2.32325	-0.13475	-0.11719
3.74	-0.43066	-0.4707	-2.28809	-0.18457	-2.9e-06
3.84	-0.40332	-0.45508	-2.28809	-0.30762	0.140625
3.93999	-0.39551	-0.44336	-2.23242	-0.25781	0.28125
4.03999	-0.37598	-0.43555	-2.23535	-0.33106	0.375
4.14	-0.35645	-0.44531	-2.17676	-0.21972	0.445312
4.24	-0.35645	-0.43945	-2.17676	-0.84375	0.542968
4.34	-0.36426	-0.43945	-2.12402	-0.17578	0.6875
4.43999	-0.34473	-0.41602	-2.10644	-0.13475	-0.87891
4.53999	-0.31348	-0.41602	-2.04785	-0.18457	-0.78906
4.64	-0.29395	-0.40039	-2.01856	-0.30762	-0.60157
4.74	-0.27832	-0.38867	-1.99219	-0.25781	-0.55469
4.84	-0.29785	-0.36133	-1.96582	-0.33106	-0.39844
4.93999	-0.29785	-0.3418	-1.96582	-0.21972	-0.30469
5.03999	-0.29395	-0.34961	-1.93067	-0.84375	-0.11719
5.14	-0.30567	-0.33789	-1.88965	-0.17578	-2.9e-06
5.24	-0.30176	-0.33008	-1.85449	-0.13475	0.140625
5.34	-0.30176	-0.33398	-1.81934	-0.18457	0.28125
5.43999	-0.27832	-0.33008	-1.74902	-0.30762	0.375
5.53999	-0.29785	-0.32617	-1.71973	-0.25781	0.445312
5.64	-0.29785	-0.31836	-1.69336	-0.21972	0.542968
5.74	-0.27832	-0.31836	-1.66699	-0.84375	0.6875
5.84	-0.27441	-0.29883	-1.61426	-0.17578	-0.87891
5.93999	-0.27441	-0.25586	-1.60254	-0.13475	-0.78906
6.03999	-0.26465	-0.26367	-1.57324	-0.18457	-0.60157
6.14	-0.25488	-0.27539	-1.53223	-0.30762	-0.55469
6.24	-0.25488	-0.25586	-1.47949	-0.25781	-0.39844
6.34	-0.23535	-0.24414	-1.43262	-0.33106	-0.30469
6.43999	-0.23145	-0.20898	-1.44727	-0.21972	-0.11719
6.53999	-0.23145	-0.18164	-1.3916	-0.84375	-2.9e-06
6.64	-0.25098	-0.17383	-1.4209	-0.17578	0.140625
6.74	-0.25098	-0.19336	-1.3916	-0.13475	0.28125
6.84	-0.25098	-0.17383	-1.36231	-0.18457	0.375
6.93999	-0.25488	-0.17773	-1.35059	-0.30762	0.445312
7.03999	-0.27441	-0.16602	-1.33301	-0.25781	0.542968
7.14	-0.25879	-0.17773	-1.292	-0.33106	0.6875
7.24	-0.24316	-0.15039	-1.24512	-0.21972	-0.87891
7.34	-0.25488	-0.11914	-1.21875	-0.84375	-0.78906
7.43999	-0.27441	-0.09961	-1.21582	-0.17578	-0.60157
7.53999	-0.27051	-0.12891	-1.16894	-0.13475	-0.55469
7.64	-0.27442	-0.11914	-1.15137	-0.18457	-0.39844
7.74	-0.28613	-0.11914	-1.13965	-0.30762	-0.30469
7.84	-0.28223	-0.11133	-1.10449	-0.25781	-0.11719
7.93999	-0.29395	-0.10742	-1.09277	-0.21972	-2.9e-06
8.03999	-0.27441	-0.09961	-1.06348	-0.84375	0.140625
8.14	-0.27442	-0.08008	-1.02247	-0.17578	0.28125
8.24	-0.2666	-0.06055	-0.97559	-0.13475	0.375
8.34	-0.25488	-0.04883	-0.96387	-0.18457	0.445312
8.43999	-0.24316	-0.06055	-0.89648	-0.30762	0.542968
8.53999	-0.21191	-0.04883	-0.84082	-0.25781	0.6875
8.64	-0.23535	0.001953	-0.82324	-0.33106	-0.87891
8.74	-0.21582	0.001953	-0.79394	-0.21972	-0.78906
8.84	-0.21582	0.021484	-0.78223	-0.84375	-0.60157
8.93999	-0.23535	0.013672	-0.76465	-0.17578	-0.55469
9.03999	-0.21582	0.001953	-0.73535	-0.13475	-0.39844
9.14	-0.21582	0.021484	-0.72364	-0.18457	-0.30469
9.24	-0.22363	0.017578	-0.71777	-0.30762	-0.11719
9.34	-0.23535	0.009766	-0.70606	-0.25781	-2.9e-06
9.43999	-0.22363	0.017578	-0.64746	-0.33106	0.140625
9.53999	-0.19238	0.048828	-0.56543	-0.21972	0.28125
9.64	-0.17285	0.052734	-0.54785	-0.84375	0.375
9.74	-0.17285	0.060547	-0.47754	-0.17578	0.445312
9.84	-0.2002	0.080078	-0.47168	-0.13475	0.542968
9.93999	-0.17285	0.052734	-0.41894	-0.18457	0.6875
10.04	-0.17285	0.080078	-0.41894	-0.30762	-0.87891
10.14	-0.16895	0.080078	-0.36329	-0.25781	-0.78906
10.24	-0.14941	0.107422	-0.34863	-2.12988	-0.60157
10.34	-0.14551	0.138672	-0.31934	-2.08301	-0.55469
10.44	-0.13379	0.150391	-0.27246	-1.99512	-0.39844
10.54	-0.15332	0.169922	-0.25488	-1.97754	-0.30469
10.64	-0.13379	0.181641	-0.21387	-1.88965	-0.11719
10.74	-0.13379	0.201172	-0.19629	-1.78418	-2.9e-06
10.84	-0.13379	0.220704	-0.17871	-1.73731	0.140625
10.94	-0.11426	0.220704	-0.09082	-1.62012	0.28125
11.04	-0.09473	0.240234	-0.07324	-1.55567	0.375
11.14	-0.0752	0.240234	-0.03223	-1.47071	0.445312
11.24	-0.10254	0.279296	-0.05566	-1.42676	0.542968
11.34	-0.09863	0.271484	-0.01465	-1.36231	0.6875
11.44	-0.06348	0.271484	0.008789	-1.31543	-0.87891
11.54	-0.05566	0.27539	0.032227	-1.25684	-0.78906
11.64	-0.05567	0.291016	0.090818	-1.22754	-0.60157
11.74	-0.03613	0.302734	0.149414	-1.16894	-0.55469
11.84	-0.00879	0.341796	0.222656	-1.08106	-0.39844
11.94	0.006836	0.357422	0.266602	-0.96973	-0.30469
12.04	0.026367	0.38086	0.331056	-0.89356	-0.11719
12.14	0.026364	0.38086	0.377925	-0.8086	-2.9e-06
12.24	0.045898	0.439454	0.389649	-0.74707	0.140625
12.34	0.053711	0.439454	0.47754	-0.70606	0.28125
12.44	0.038086	0.478516	0.465819	-0.6709	0.375
12.54	0.022461	0.470704	0.506835	-0.62988	0.445312
12.64	0.041989	0.458984	0.583005	-0.49512	0.542968
12.74	0.041992	0.490234	0.594726	-0.44824	0.6875
12.84	0.06543	0.458984	0.629883	-0.38379	-0.87891
12.94	0.081055	0.490234	0.670899	-0.30176	-0.78906
13.04	0.116211	0.509766	0.694335	-0.18457	-0.60157
13.14	0.124021	0.533204	0.747066	-0.14356	-0.55469
13.24	0.104492	0.552734	0.75879	-0.10254	-0.39844
13.34	0.112305	0.541016	0.793944	-0.05859	-0.30469
13.44	0.143555	0.560546	0.875976	0.038086	-0.11719
13.54	0.143555	0.59961	0.893556	0.055664	-2.9e-06
13.64	0.147459	0.59961	0.952146	0.125974	0.140625
13.74	0.143555	0.623046	0.963867	0.166992	0.28125
13.84	0.170898	0.642578	1.05176	0.243164	0.375
13.94	0.182617	0.66211	1.11035	0.301758	0.445312
14.04	0.182617	0.673828	1.16894	0.342774	0.542968
14.14	0.202148	0.68164	1.19824	0.401364	0.6875
14.24	0.202148	0.701172	1.25683	0.483399	-0.87891
14.34	0.182617	0.701172	1.25683	0.495117	-0.78906
14.44	0.196289	0.701172	1.32129	0.518556	-0.60157
14.54	0.20996	0.72461	1.37988	0.559569	-0.55469
14.64	0.206054	0.74414	1.42675	0.635739	-0.39844
14.74	0.206054	0.763672	1.37988	0.676758	-0.30469
14.84	0.206054	0.763672	1.40918	0.729492	-0.11719
14.94	0.206054	0.74414	1.43848	0.799806	-2.9e-06
15.04	0.206054	0.763672	1.43848	0.829101	0.140625
15.14	0.233396	0.763672	1.49707	0.90234	0.28125
15.24	0.245118	0.794922	1.55567	0.969726	0.375
15.34	0.25293	0.783204	1.56738	1.03418	0.445312
15.44	0.28418	0.791016	1.64942	1.09277	0.542968
15.54	0.28418	0.822266	1.66699	1.16894	0.6875
15.64	0.28418	0.841796	1.6377	1.19824	-0.87891
15.74	0.264648	0.814454	1.64942	1.26269	-0.78906
15.84	0.288086	0.810546	1.68457	1.26856	-0.60157
15.94	0.307618	0.845704	1.71387	1.36817	-0.55469
16.04	0.307618	0.841796	1.77246	1.45606	-0.39844
16.14	0.33496	0.861328	1.83105	1.51465	-0.30469
16.24	0.34668	0.861328	1.87207	1.60254	-0.11719
16.34	0.34668	0.873046	1.88965	1.65527	-2.9e-06
16.44	0.34668	0.84961	1.88965	1.68457	0.140625
16.54	0.338868	0.861328	1.93652	1.77246	0.28125
16.64	0.32715	0.853516	1.91895	1.80762	0.375
16.74	0.34668	0.841796	1.97754	1.90723	0.445312
16.84	0.342774	0.841796	2.03613	2.00977	0.542968
16.94	0.342774	0.861328	2.03613	2.05371	0.6875
17.04	0.338868	0.841796	2.08887	2.09473	-0.87891
17.14	0.354492	0.857422	2.14746	2.11816	-0.78906
17.24	0.36621	0.873046	2.18262	2.16504	-0.60157
17.34	0.36621	0.865234	2.19434	2.23535	-0.55469
17.44	0.385742	0.884766	2.23535	2.32324	-0.39844
17.54	0.37793	0.904296	2.22949	2.33496	-0.30469
17.64	0.385742	0.896484	2.25293	2.37598	-0.11719
17.74	0.385742	0.884766	2.31152	2.47559	-2.9e-06
17.84	0.385742	0.904296	2.34082	2.55176	0.140625
17.94	0.385742	0.90039	2.34082	2.59863	0.28125
18.04	0.385742	0.88086	2.39941	2.68652	0.375
18.14	0.41699	0.90039	2.43457	2.76855	0.445312
18.24	0.42871	0.923828	2.46387	2.80957	0.542968
18.34	0.42871	0.923828	2.52246	2.90332	0.6875
18.44	0.42871	0.94336	2.52246	2.95019	-0.30469
18.54	0.42871	0.94336	2.55176	2.99121	-0.11719
18.64	0.42871	0.923828	2.61621	3.03516	-2.9e-06
18.74	0.448242	0.94336	2.64551	3.10254	0.140625
18.84	0.467774	0.94336	2.66309	3.19629	0.28125
18.94	0.487304	0.96289	2.7041	3.27246	0.375
19.04	0.463868	0.96289	2.7041	3.31347	0.445312
19.14	0.473632	0.96289	2.73633	3.38673	0.542968
19.24	0.45996	0.972656	2.75684	3.41895	0.6875
19.34	0.45996	0.986328	2.75684	3.45996	0.753908
19.44	0.479492	0.998046	2.81543	3.53613	0.867188
19.54	0.50293	0.998046	2.86816	3.6123	1.05469
19.64	0.502928	1.0293	2.87988	3.65919	1.19531
19.74	0.541992	1.06055	2.93848	3.72363	1.36719
19.84	0.541992	1.0918	2.99707	3.76464	1.55469
19.94	0.52246	1.10742	2.98242	3.81153	1.67188
20.04	0.541992	1.11914	3.02052	3.87012	1.83594
20.14	0.541992	1.13867	3.02052	3.91113	1.96875
20.24	0.52246	1.13867	3.0498	3.94044	2.11719
20.34	0.541992	1.13867	3.07911	4.02246	2.27344
20.44	0.53418	1.13867	3.10254	4.00782	2.39844
20.54	0.530274	1.13867	3.12597	4.06935	2.52734
20.64	0.514648	1.1582	3.12012	4.15137	2.625
20.74	0.526368	1.15039	3.1494	4.18653	2.71875
20.84	0.530274	1.16211	3.21972	4.2744	2.90625
20.94	0.52246	1.17773	3.25488	4.30956	3.01562
21.04	0.541992	1.19336	3.29589	4.3623	3.07812
21.14	0.54199	1.20117	3.34278	4.40919	3.23437
21.24	0.541992	1.19727	3.35448	4.42677	3.27344
21.34	0.52246	1.19727	3.41895	4.48536	3.375
21.44	0.541992	1.17773	3.44823	4.56153	3.51562
21.54	0.541992	1.19727	3.50685	4.59081	3.67969
21.64	0.530274	1.22656	3.53613	4.63185	3.75391
21.74	0.561524	1.2207	3.59472	4.67871	3.86719
21.84	0.541992	1.24023	3.59472	4.7256	3.95312
21.94	0.549804	1.24023	3.66504	4.78125	4.125
22.04	0.56543	1.24805	3.70605	4.87206	4.29688
22.14	0.541992	1.2832	3.68847	4.95996	4.35936
22.24	0.541992	1.2832	3.70605	5.0127	4.47656
22.34	0.52246	1.30273	3.72948	5.05371	4.60156
22.44	0.532226	1.32227	3.79395	5.1123	4.65624
22.54	0.545898	1.3418	3.80565	5.18847	4.79688
22.64	0.555664	1.3418	3.82032	5.21484	4.89452
22.74	0.588868	1.37109	3.8994	5.31738	5.06252
22.84	0.569336	1.38477	3.93456	5.3877	5.1992
22.94	0.588868	1.38477	3.99315	5.46387	5.28124
23.04	0.569336	1.4043	4.02246	5.4756	5.375
23.14	0.545898	1.42383	4.08105	5.49315	5.51564
23.24	0.545898	1.42383	4.09863	5.56935	5.64064
23.34	0.55371	1.42383	4.12206	5.62794	5.77344
23.44	0.55371	1.45117	4.15722	5.68653	5.92188
23.54	0.56543	1.44336	4.16895	5.7744	6.03908
23.64	0.541992	1.46289	4.22169	5.81544	6.18748
23.74	0.530274	1.47852	4.23339	5.84472	6.26564
23.84	0.530274	1.44727	4.28028	5.93262	6.4414
23.94	0.510742	1.44727	4.29786	5.97657	6.56252
24.04	0.538086	1.44727	4.35645	6.04395	6.67968
24.14	0.545898	1.4668	4.41504	6.12597	6.8828
24.24	0.56543	1.48633	4.44435	6.19629	6.96092
24.34	0.56543	1.49414	4.50294	6.25488	7.07812
24.44	0.538086	1.51758	4.5498	6.31347	7.20312
24.54	0.53418	1.52539	4.53222	6.37206	7.2422
24.64	0.545898	1.50586	4.56153	6.44823	7.39452
24.74	0.526368	1.52539	4.59081	6.46581	7.4922
24.84	0.506836	1.5332	4.62012	6.5127	7.67188
24.94	0.510742	1.54492	4.68456	6.55956	7.80468
25.04	0.530274	1.54492	4.71387	6.63573	7.96092
25.14	0.557616	1.56445	4.79004	6.68847	8.07032
25.24	0.561524	1.57227	4.79589	6.74706	8.21092
25.34	0.549804	1.57617	4.79298	6.74121	8.32032
25.44	0.569336	1.56445	4.83105	6.81738	8.48436
25.54	0.56543	1.58398	4.88964	6.85839	8.65624
25.64	0.58496	1.5918	4.91895	6.94629	8.84376
25.74	0.592774	1.62305	4.97754	6.99315	9.01564
25.84	0.58496	1.62305	4.96581	7.04004	9.08204
25.94	0.608398	1.62305	5.0127	7.13379	9.16408
26.04	0.588868	1.62695	5.0127	7.15137	9.2422
26.14	0.608398	1.62695	5.04198	7.22169	9.35936
26.24	0.635742	1.64648	5.07129	7.30956	9.44532
26.34	0.62793	1.6543	5.05956	7.35939	9.52344
26.44	0.64746	1.66602	5.1006	7.39746	9.6172
26.54	0.64746	1.66602	5.1006	7.41504	9.76564
26.64	0.64746	1.66602	5.15919	7.47363	9.92188
26.74	0.655274	1.68555	5.2002	7.55565	10.0586
26.84	0.666992	1.69336	5.23536	7.62597	10.2109
26.94	0.639648	1.70117	5.24121	7.65528	10.2969
27.04	0.64746	1.69336	5.25294	7.7256	10.3984
27.14	0.66699	1.70117	5.31153	7.81347	10.4766
27.24	0.686524	1.7207	5.34081	7.89552	10.5938
27.34	0.694336	1.74023	5.37012	7.90722	10.6797
27.44	0.725586	1.76367	5.46387	8.03028	10.8438
27.54	0.745118	1.7832	5.48145	8.07714	10.9688
27.64	0.764648	1.80273	5.52246	8.10645	11.082
27.74	0.764648	1.82227	5.55177	8.14746	11.2109
27.84	0.754882	1.82227	5.56641	8.21484	11.3008
27.94	0.760742	1.83203	5.5752	8.26464	11.3516
28.04	0.760742	1.82617	5.63379	8.3379	11.4844
28.14	0.768554	1.85742	5.63379	8.37597	11.6328
28.24	0.799804	1.83789	5.65137	8.46972	11.7891
28.34	0.77246	1.87695	5.6631	8.52831	11.875
28.44	0.78418	1.87695	5.69823	8.62206	12
28.54	0.78418	1.88086	5.72754	8.66895	12.1172
28.64	0.764648	1.88086	5.74512	8.70996	12.2422
28.74	0.764648	1.90039	5.7627	8.73339	12.3164
28.84	0.78418	1.88086	5.79198	8.80371	12.3672
28.94	0.78418	1.90039	5.80956	8.87988	12.5156
29.04	0.78418	1.91992	5.82129	8.92089	12.6094
29.14	0.784178	1.90039	5.85057	8.99706	12.789
29.24	0.78418	1.91211	5.87988	9.01464	12.875
29.34	0.760742	1.90039	5.87988	9.04395	12.9531
29.44	0.760742	1.88086	5.87988	9.03222	13.0312
29.54	0.760742	1.88086	5.93847	9.07323	13.1719
29.64	0.76074	1.9082	5.96778	9.13182	13.3516
29.74	0.760742	1.93945	6.02637	9.1494	13.3984
29.84	0.770508	1.93164	6.05565	9.20508	13.5312
29.94	0.78418	1.94922	6.05565	9.2256	13.6484
30.04	0.788086	1.96289	6.12012	9.30762	13.8047
30.14	0.768554	1.9668	6.1494	9.31056	13.8828
30.24	0.788086	1.97461	6.17871	9.34863	13.9609
30.34	0.768554	1.97852	6.20214	9.36621	14.0156
30.44	0.768554	1.98633	6.21387	9.4248	14.2031
30.54	0.749024	1.99414	6.21387	9.43653	14.2812
30.64	0.725586	2.00586	6.24315	9.46581	14.3281
30.74	0.75293	1.97461	6.27246	9.54786	14.4453
30.84	0.78418	2.01368	6.33105	9.58887	14.5391
30.94	0.78418	2.0371	6.36036	9.63573	14.6836
31.04	0.764648	2.04492	6.38964	9.64746	14.7578
31.14	0.764648	2.02148	6.43653	9.72363	14.8906
31.24	0.764648	2.06446	6.47754	9.76464	15.0781
31.34	0.745118	2.06054	6.50685	9.82323	15.1562
31.44	0.795898	2.08398	6.57129	9.91113	15.2812
31.54	0.807618	2.12696	6.6006	9.95214	15.3438
31.64	0.807616	2.12696	6.65331	10.0283	15.5234
31.74	0.827148	2.13868	6.66504	10.0694	15.6875
31.84	0.827148	2.14648	6.69435	10.0986	15.8203
31.94	0.827148	2.14648	6.72363	10.1572	15.9609
32.04	0.84668	2.16602	6.75294	10.2393	16.0859
32.14	0.823242	2.18554	6.78222	10.251	16.1406
32.24	0.850586	2.18554	6.84081	10.3242	16.3164
32.34	0.842774	2.20508	6.82911	10.333	16.3594
32.44	0.842774	2.19726	6.87012	10.3799	16.4922
32.54	0.823242	2.20508	6.8994	10.4268	16.5938
32.64	0.80371	2.20508	6.8994	10.5029	16.6953
32.74	0.793946	2.20508	6.91407	10.5586	16.8164
32.84	0.760742	2.20704	6.92286	10.6143	16.8281
32.94	0.764648	2.1582	6.95802	10.667	16.9375
33.04	0.74121	2.18164	6.9756	10.7256	17.0781
33.14	0.76074	2.18164	6.9873	10.8018	17.2109
33.24	0.760742	2.20118	7.04589	10.8428	17.3203
33.34	0.780274	2.20118	7.0752	10.9541	17.4922
33.44	0.760742	2.24024	7.11036	10.9658	17.6016
33.54	0.79004	2.2207	7.15431	11.0566	17.7539
33.64	0.803708	2.25	7.19238	11.1475	17.8789
33.74	0.823242	2.27344	7.23339	11.1944	17.9688
33.84	0.80371	2.2793	7.20411	11.206	18.0781
33.94	0.80371	2.2793	7.20411	11.2559	18.1328
34.04	0.80371	2.28906	7.22169	11.294	18.2891
34.14	0.82324	2.30274	7.23339	11.3701	18.4375
34.24	0.827148	2.29296	7.28319	11.417	18.5234
34.34	0.807618	2.30274	7.29198	11.4346	18.6172
34.44	0.827148	2.30274	7.32129	11.5107	18.6875
34.54	0.827148	2.32226	7.3506	11.5986	18.7266
34.64	0.827148	2.3418	7.3506	11.5869	18.8203
34.74	0.836914	2.3418	7.36524	11.6426	18.918
34.84	0.813476	2.35156	7.35939	11.6836	19.0195
34.94	0.836914	2.34766	7.42383	11.7188	19.1211
35.04	0.819336	2.36328	7.43262	11.7451	19.2344
35.14	0.819334	2.36524	7.47948	11.792	19.375
35.24	0.819336	2.38868	7.43262	11.833	19.4531
35.34	0.819336	2.37696	7.49121	11.8799	19.6094
35.44	0.799804	2.39648	7.49121	11.9209	19.668
35.54	0.811524	2.41602	7.49706	11.9531	19.75
35.64	0.799806	2.42774	7.46193	11.9795	19.7891
35.74	0.780274	2.41602	7.49121	11.9971	19.8828
35.84	0.811524	2.39648	7.5381	12.085	20.0703
35.94	0.823242	2.44726	7.58496	12.1611	20.1953
36.04	0.81543	2.45118	7.57323	12.167	20.2188
36.14	0.811522	2.43164	7.59669	12.2021	20.3516
36.24	0.823242	2.44726	7.6494	12.2549	20.4375
36.34	0.81543	2.43946	7.66698	12.3194	20.5547
36.44	0.823242	2.45118	7.67871	12.3428	20.6797
36.54	0.850586	2.45898	7.71972	12.4306	20.8281
36.64	0.852538	2.50586	7.72557	12.4893	20.9531
36.74	0.858398	2.49804	7.69629	12.501	20.9922
36.84	0.86621	2.49024	7.70802	12.5537	21.1328
36.94	0.856446	2.49804	7.7373	12.6123	21.1953
37.04	0.838868	2.49804	7.76661	12.6592	21.2891
37.14	0.819336	2.49024	7.7256	12.6885	21.4141
37.24	0.838868	2.47852	7.7373	12.7354	21.5547
37.34	0.84668	2.49804	7.74903	12.7764	21.6641
37.44	0.831054	2.50586	7.75488	12.8291	21.7578
37.54	0.842774	2.49024	7.80177	12.8584	21.918
37.64	0.833008	2.50196	7.80177	12.8731	21.9531
37.74	0.86621	2.48242	7.86036	12.9111	22.0938
37.84	0.856446	2.50196	7.86036	12.9404	22.1953
37.94	0.862304	2.50196	7.88964	12.999	22.3281
38.04	0.862304	2.50196	7.88964	13.0518	22.4531
38.14	0.901366	2.50196	7.90722	13.1221	22.5156
38.24	0.881836	2.52148	7.88964	13.1396	22.6484
38.34	0.901368	2.52148	7.94823	13.21	22.7969
38.44	0.893554	2.52148	7.9248	13.2627	22.875
38.54	0.881836	2.5332	7.91895	13.333	22.9531
38.64	0.881836	2.54882	7.94823	13.3213	23.0391
38.74	0.901368	2.56054	8.00685	13.3916	23.0938
38.84	0.920898	2.58008	8.0244	13.4502	23.2344
38.94	0.954102	2.5996	8.07129	13.5322	23.3359
39.04	0.956054	2.62304	8.08302	13.5615	23.457
39.14	0.987302	2.63086	8.15919	13.6553	23.5547
39.24	0.967774	2.64258	8.15919	13.667	23.6094
39.34	0.967774	2.6621	8.19435	13.6963	23.6797
39.44	0.987304	2.64258	8.22363	13.7549	23.7734
39.54	0.987304	2.6621	8.22363	13.8018	23.875
39.64	0.979492	2.6621	8.22948	13.831	23.9531
39.74	0.967774	2.6543	8.22363	13.8486	24.0391
39.84	1.00684	2.64258	8.31153	13.9248	24.1719
39.94	0.983398	2.68164	8.34081	13.9658	24.2734
40.04	1.00293	2.68164	8.37012	14.0391	24.375
40.14	1.02246	2.69336	8.42871	14.0771	24.4922
40.24	1.02246	2.67774	8.45802	14.1416	24.5938
40.34	1.00293	2.67774	8.45802	14.1299	24.6484
40.44	1.00293	2.6582	8.4873	14.1709	24.7188
40.54	1.02246	2.66602	8.53125	14.2178	24.8516
40.64	1.0459	2.67774	8.5752	14.2646	24.957
40.74	1.0459	2.70118	8.59863	14.3232	25.0078
40.84	1.0459	2.70118	8.61036	14.3819	25.1172
40.94	1.0459	2.7207	8.63964	14.4053	25.1719
41.04	1.06543	2.7207	8.66895	14.4463	25.3125
41.14	1.06543	2.74024	8.68653	14.5342	25.414
41.24	1.08496	2.74024	8.73927	14.5928	25.5156
41.34	1.10449	2.75976	8.78613	14.669	25.6094
41.44	1.08496	2.7793	8.80371	14.71	25.7266
41.54	1.10449	2.75976	8.81544	14.7627	25.8516
41.64	1.10449	2.7793	8.87403	14.8037	25.9922
41.74	1.13574	2.79882	8.93847	14.8857	26.0938
41.84	1.14746	2.80274	8.96778	14.8975	26.1562
41.94	1.13965	2.80274	8.96778	14.956	26.2578
42.04	1.15527	2.80274	9.01464	15.0029	26.4141
42.14	1.14746	2.80274	9.03222	15.0205	26.4766
42.24	1.15918	2.80274	9.09081	15.0938	26.5781
42.34	1.14746	2.82226	9.09081	15.1025	26.6406
42.44	1.16699	2.82226	9.16698	15.1904	26.7344
42.54	1.14746	2.8418	9.1494	15.2373	26.8125
42.64	1.16699	2.82226	9.20802	15.2842	26.9609
42.74	1.15918	2.8418	9.2256	15.3194	27
42.84	1.13574	2.83398	9.24903	15.3252	27.0898
42.94	1.18652	2.83008	9.3252	15.4306	27.25
43.04	1.16309	2.88086	9.34278	15.46	27.3281
43.14	1.16308	2.88086	9.35448	15.5361	27.4297
43.24	1.16309	2.9004	9.38964	15.5479	27.4844
43.34	1.1748	2.9004	9.45411	15.6181	27.6016
43.44	1.18652	2.93164	9.48339	15.665	27.6562
43.54	1.17871	2.94336	9.50097	15.6944	27.7188
43.64	1.15527	2.93554	9.5244	15.706	27.7734
43.74	1.16699	2.93164	9.54198	15.794	27.8984
43.84	1.17871	2.95508	9.58887	15.835	28
43.94	1.14746	2.95508	9.57129	15.8174	28.0391
44.04	1.15527	2.94336	9.6123	15.8291	28.1875
44.14	1.13965	2.95118	9.61815	15.876	28.2812
44.24	1.14355	2.95508	9.67089	15.9287	28.375
44.34	1.1709	2.9707	9.70605	16.0078	28.4375
44.44	1.14355	2.99414	9.74706	16.0225	28.5703
44.54	1.14355	3.00196	9.77637	16.0635	28.6016
44.64	1.14355	3.00196	9.80565	16.1104	28.7344
44.74	1.14355	2.99804	9.84081	16.1514	28.8125
44.84	1.16309	2.99804	9.87012	16.1982	28.9297
44.94	1.16309	3.04102	9.8994	16.2393	29.0391
45.04	1.16309	3.01758	9.92871	16.3213	29.0742
45.14	1.15137	3.0371	9.91698	16.333	29.125
45.24	1.16699	3.0371	9.96387	16.415	29.25
45.34	1.18652	3.08398	10.0225	16.4561	29.3984
45.44	1.18652	3.08008	10.081	16.5322	29.5312
45.54	1.20605	3.11524	10.1104	16.5791	29.6875
45.64	1.20605	3.12304	10.1279	16.6553	29.7578
45.74	1.20605	3.14258	10.1396	16.6963	29.8125
45.84	1.20605	3.14258	10.1982	16.7842	29.9141
45.94	1.20605	3.1621	10.2275	16.7988	30.0078
46.04	1.21777	3.1621	10.2569	16.8428	30.1172
46.14	1.21387	3.18164	10.292	16.8604	30.1719
46.24	1.22559	3.18164	10.3213	16.8721	30.2344
46.34	1.21387	3.18164	10.3535	16.9365	30.3516
46.44	1.2334	3.19336	10.3565	16.9424	30.375
46.54	1.24512	3.16602	10.4092	17.0127	30.5
46.64	1.2334	3.2246	10.4092	17.0537	30.6172
46.74	1.25684	3.20118	10.4678	17.1357	30.7188
46.84	1.2334	3.2207	10.4971	17.1944	30.7812
46.94	1.26465	3.2207	10.5556	17.2646	30.957
47.04	1.27637	3.24024	10.5732	17.3467	31.0156
47.14	1.29199	3.25196	10.585	17.376	31.0547
47.24	1.30371	3.25976	10.6787	17.4346	31.1719
47.34	1.30371	3.2793	10.667	17.4463	31.2344
47.44	1.32324	3.2793	10.6787	17.5195	31.3672
47.54	1.32324	3.29882	10.7373	17.5928	31.4297
47.64	1.34668	3.31836	10.7725	17.6865	31.539
47.74	1.36621	3.32226	10.831	17.7627	31.6562
47.84	1.35449	3.3418	10.8486	17.8037	31.7578
47.94	1.38574	3.3418	10.8604	17.8506	31.8594
48.04	1.38574	3.35352	10.919	17.8916	31.9609
48.14	1.3584	3.36132	10.9072	17.9444	32.0391
48.24	1.36621	3.35352	10.9482	17.9736	32.1328
48.34	1.35449	3.36132	10.9482	18.0146	32.2422
48.44	1.38574	3.36132	11.0069	18.0908	32.3359
48.54	1.41309	3.38868	11.0361	18.167	32.4922
48.64	1.4209	3.4121	11.0537	18.2139	32.6016
48.74	1.41309	3.41992	11.0244	18.2021	32.6406
48.84	1.4209	3.39258	11.0654	18.2256	32.7188
48.94	1.44434	3.4004	11.1299	18.3076	32.8203
49.04	1.46387	3.42382	11.1475	18.3779	32.9453
49.14	1.4834	3.44336	11.1592	18.4306	33.0234
49.24	1.49316	3.4629	11.1885	18.501	33.1211
49.34	1.50684	3.49024	11.1885	18.5303	33.2109
49.44	1.52637	3.48242	11.2529	18.5889	33.3203
49.54	1.52637	3.51368	11.2822	18.6768	33.4531
49.64	1.55371	3.50196	11.3291	18.7354	33.5703
49.74	1.56543	3.52148	11.3701	18.7793	33.6328
49.84	1.56543	3.54102	11.3701	18.7939	33.6719
49.94	1.5459	3.54102	11.3584	18.8408	33.7344
50.04	1.56152	3.52148	11.4053	18.876	33.7891
50.14	1.53027	3.56446	11.4229	18.876	33.8203
50.24	1.53809	3.54492	11.417	18.8994	33.9141
50.34	1.53027	3.54492	11.4639	18.9463	34.0078
50.44	1.55762	3.54492	11.4815	18.9931	34.125
50.54	1.56934	3.56446	11.4639	19.04	34.1797
50.64	1.58887	3.55664	11.4931	19.0576	34.3438
50.74	1.62402	3.57226	11.5635	19.0986	34.4766
50.84	1.62793	3.60352	11.581	19.1572	34.5625
50.94	1.64746	3.60352	11.6396	19.2158	34.6172
51.04	1.64746	3.62304	11.6396	19.2334	34.7148
51.14	1.65918	3.62304	11.6426	19.2627	34.7969
51.24	1.6748	3.63476	11.6806	19.3506	34.9062
51.34	1.6748	3.63086	11.7158	19.4326	34.9766
51.44	1.65137	3.6543	11.71	19.4678	35.0234
51.54	1.66309	3.6504	11.7275	19.5	35.1172
51.64	1.63574	3.6621	11.7451	19.5264	35.1172
51.74	1.65527	3.6543	11.7744	19.6201	35.2344
51.84	1.66699	3.67382	11.8096	19.6846	35.3438
51.94	1.6748	3.67774	11.8037	19.6963	35.3984
52.04	1.68652	3.67382	11.8506	19.7549	35.5234
52.14	1.68652	3.70508	11.8799	19.8428	35.6172
52.24	1.66699	3.70508	11.9092	19.8779	35.7344
52.34	1.66699	3.70508	11.9092	19.9072	35.8047
52.44	1.66699	3.70508	11.9385	19.9541	35.9375
52.54	1.66699	3.7246	11.956	20.0244	36.0391
52.64	1.66699	3.73632	11.9385	20.0537	36.0781
52.74	1.64355	3.73242	11.9385	20.0713	36.1211
52.84	1.65137	3.74414	11.9678	20.1181	36.2109
52.94	1.64355	3.73632	11.9678	20.1475	36.3281
53.04	1.65527	3.70508	11.9854	20.2061	36.4375
53.14	1.64355	3.7246	11.9971	20.2529	36.4766
53.24	1.62402	3.7246	11.9971	20.2646	36.5703
53.34	1.64355	3.7246	12.0264	20.3525	36.6719
53.44	1.62402	3.73632	12.0556	20.3701	36.7344
53.54	1.65137	3.7246	12.085	20.4463	36.8359
53.64	1.69043	3.74414	12.1142	20.5459	36.9453
53.74	1.6748	3.77148	12.1143	20.6221	37.0469
53.84	1.67871	3.75976	12.167	20.6924	37.1875
53.94	1.6748	3.7754	12.1611	20.7041	37.2344
54.04	1.70605	3.77148	12.208	20.8096	37.3594
54.14	1.68652	3.80274	12.2431	20.8271	37.4219
54.24	1.68652	3.80274	12.2431	20.8681	37.5234
54.34	1.68652	3.80274	12.3018	20.9268	37.5625
54.44	1.67871	3.82226	12.29	20.9648	37.6406
54.54	1.66699	3.79492	12.331	20.9854	37.6758
54.64	1.64746	3.8125	12.331	21.0146	37.7344
54.74	1.65527	3.78906	12.3721	21.085	37.8516
54.84	1.66699	3.81054	12.3896	21.1201	37.9141
54.94	1.65137	3.8125	12.3779	21.1201	38
55.04	1.65527	3.80078	12.4306	21.1729	38.0938
55.14	1.64355	3.83008	12.4482	21.2197	38.1719
55.24	1.66309	3.8418	12.5069	21.3018	38.3359
55.34	1.66309	3.83204	12.5069	21.2725	38.3984
55.44	1.65527	3.84766	12.5361	21.3135	38.5156
55.54	1.64355	3.8711	12.5537	21.3604	38.5703
55.64	1.64355	3.8379	12.5771	21.4014	38.6797
55.74	1.64355	3.85742	12.624	21.4306	38.7734
55.84	1.66699	3.85742	12.6592	21.4951	38.8828
55.94	1.64746	3.86132	12.6475	21.5303	38.9844
56.04	1.66699	3.8711	12.6592	21.5771	39.1016
56.14	1.66699	3.9043	12.6592	21.5889	39.1602
56.24	1.64746	3.88476	12.6885	21.6181	39.25
56.34	1.66699	3.88476	12.7178	21.7061	39.3594
56.44	1.64746	3.9121	12.7178	21.7236	39.375
56.54	1.63965	3.9043	12.706	21.7588	39.4766
56.64	1.6084	3.89648	12.7119	21.7705	39.5547
56.74	1.6084	3.88476	12.7236	21.8174	39.6562
56.84	1.62793	3.9043	12.7529	21.8584	39.7344
56.94	1.62793	3.92382	12.7822	21.9053	39.7969
57.04	1.64746	3.9043	12.8115	21.9463	39.9297
57.14	1.64746	3.92382	12.8408	21.9756	40
57.24	1.66699	3.9043	12.8701	22.0195	40.0936
57.34	1.66699	3.92382	12.8994	22.0635	40.172
57.44	1.64355	3.9043	12.8994	22.0811	40.2968
57.54	1.65527	3.9043	12.917	22.1104	40.3828
57.64	1.62402	3.92382	12.917	22.1104	40.4532
57.74	1.66699	3.92382	12.9346	22.1572	40.5624
57.84	1.64746	3.94726	12.9639	22.2158	40.6252
57.94	1.66699	3.94726	12.9931	22.2686	40.7032
58.04	1.64746	3.94336	13.0108	22.3096	40.7656
58.14	1.66699	3.94336	13.0517	22.3271	40.8592
58.24	1.66699	3.9629	13.04	22.3271	40.922
58.34	1.68652	3.95508	13.0869	22.3975	41.0428
58.44	1.70605	3.9629	13.1162	22.4736	41.0936
58.54	1.71387	3.98242	13.1865	22.5029	41.1876
58.64	1.71777	3.99024	13.2217	22.5556	41.2968
58.74	1.7334	4.02148	13.2744	22.5908	41.3048
58.84	1.74512	4.04882	13.292	22.6377	41.414
58.94	1.7373	4.06054	13.3389	22.6846	41.5392
59.04	1.72559	4.05274	13.3213	22.7139	41.5704
59.14	1.70605	4.04102	13.3506	22.7256	41.6484
59.24	1.70605	4.04102	13.3799	22.7549	41.7188
59.34	1.70605	4.04102	13.3799	22.7754	41.758
59.44	1.72558	4.02148	13.4385	22.8428	41.8516
59.54	1.70605	4.04102	13.4385	22.8721	41.914
59.64	1.70605	4.04102	13.4385	22.9014	41.9376
59.74	1.70605	4.04882	13.4736	22.9189	42
59.84	1.70605	4.08008	13.4736	22.9306	42.0936
59.94	1.7373	4.08008	13.5088	22.9951	42.2032
60.04	1.76855	4.10352	13.5381	23.0596	42.3048
60.14	1.76855	4.12304	13.5556	23.0771	42.3436
60.24	1.78809	4.12304	13.5674	23.1181	42.4608
60.34	1.76855	4.12304	13.5674	23.165	42.5
60.44	1.80762	4.12304	13.626	23.2354	42.6564
60.54	1.80762	4.14258	13.6553	23.2822	42.7656
60.64	1.78418	4.1621	13.6553	23.2998	42.8592
60.74	1.80371	4.14258	13.6846	23.3584	42.9764
60.84	1.80371	4.1621	13.6992	23.3877	43.0624
60.94	1.80371	4.1621	13.6787	23.417	43.082
61.04	1.80371	4.18164	13.708	23.4931	43.172
61.14	1.80371	4.18164	13.7373	23.5342	43.25
61.24	1.80371	4.18164	13.7549	23.5928	43.414
61.34	1.84668	4.20118	13.8017	23.6514	43.5392
61.44	1.85449	4.2246	13.831	23.6924	43.6408
61.54	1.89356	4.24414	13.9014	23.7627	43.75
61.64	1.89746	4.27148	13.919	23.8389	43.8516
61.74	1.88574	4.2832	13.9482	23.8857	44
61.84	1.87402	4.30274	13.9658	23.8681	44.0156
61.94	1.89746	4.2832	13.9482	23.9414	44.1564
62.04	1.88574	4.30274	13.9483	23.9561	44.258
62.14	1.90527	4.31054	13.9775	24.0146	44.414
62.24	1.9248	4.3418	14.0361	24.1025	44.4764
62.34	1.90527	4.35352	14.0361	24.0908	44.5312
62.44	1.9248	4.3418	14.0654	24.1318	44.6564
62.54	1.92481	4.3418	14.0654	24.1787	44.7736
62.64	1.92871	4.3418	14.1299	24.2256	44.8828
62.74	1.91699	4.3457	14.1416	24.2608	44.9376
62.84	1.9209	4.35352	14.1767	24.3486	45.1016
62.94	1.92871	4.39648	14.2354	24.4072	45.258
63.04	1.94824	4.4043	14.2705	24.4951	45.336
63.14	1.96777	4.42382	14.2822	24.5537	45.4608
63.24	1.96778	4.45118	14.2822	24.583	45.5236
63.34	1.9873	4.4629	14.3115	24.6416	45.6408
63.44	1.9873	4.48242	14.3115	24.6768	45.6952
63.54	2.01464	4.4746	14.3525	24.7646	45.7968
63.64	2.00292	4.47852	14.3994	24.7939	45.8592
63.74	2.02246	4.49414	14.4287	24.8525	45.9764
63.84	2.00292	4.50196	14.4287	24.8819	46.0352
63.94	1.9834	4.48242	14.4287	24.9111	46.0468
64.04	2.00292	4.50196	14.458	24.9697	46.164
64.14	1.9834	4.52148	14.4463	25.0225	46.25
64.24	2.00684	4.50196	14.4639	25.0694	46.3204
64.34	2.01464	4.5254	14.5049	25.1396	46.4296
64.44	2.0459	4.55274	14.581	25.2451	46.5312
64.54	2.06542	4.58398	14.6104	25.3037	46.6328
64.64	2.06542	4.5879	14.6104	25.3213	46.6564
64.74	2.08496	4.5918	14.6396	25.333	46.7736
64.84	2.08496	4.5996	14.6572	25.3681	46.8124
64.94	2.08496	4.5996	14.669	25.4561	46.914
65.04	2.1045	4.63476	14.7275	25.5029	46.9688
65.14	2.12402	4.64258	14.7568	25.5439	47.0468
65.24	2.13184	4.6621	14.7685	25.585	47.1484
65.34	2.13964	4.66992	14.8096	25.6553	47.2656
65.44	2.12794	4.70508	14.8213	25.667	47.258
65.54	2.12794	4.68164	14.8799	25.7139	47.3752
65.64	2.13574	4.70118	14.8916	25.708	47.4296
65.74	2.15918	4.70898	14.9385	25.79	47.578
65.84	2.13184	4.74024	14.9678	25.8076	47.6172
65.94	2.14356	4.74024	14.9678	25.8486	47.6408
66.04	2.14356	4.74024	14.9678	25.8779	47.6564
66.14	2.13574	4.7207	15.0322	25.9365	47.7188
66.24	2.13184	4.75976	15.0322	25.9951	47.758
66.34	2.14356	4.74024	15.0908	26.0596	47.8124
66.44	2.13574	4.75976	15.0908	26.0889	47.8592
66.54	2.15136	4.75976	15.1201	26.1475	47.9572
66.64	2.16308	4.7871	15.1201	26.2061	47.9688
66.74	2.16308	4.79102	15.1787	26.25	48.0468
66.84	2.16308	4.82618	15.1787	26.2588	48.0704
66.94	2.1709	4.81836	15.249	26.3174	48.2264
67.04	2.1748	4.8457	15.2549	26.3701	48.3516
67.14	2.18652	4.8496	15.3018	26.3877	48.3984
67.24	2.18652	4.86132	15.29	26.4463	48.4376
67.34	2.21386	4.86132	15.3428	26.5166	48.5468
67.44	2.22558	4.86914	15.3721	26.5928	48.6564
67.54	2.21778	4.9004	15.4365	26.6279	48.758
67.64	2.20606	4.9121	15.419	26.6221	48.836
67.74	2.20606	4.89258	15.4483	26.6572	48.8984
67.84	2.22558	4.88086	15.4775	26.7158	48.9608
67.94	2.22558	4.88086	15.5068	26.7627	49.0548
68.04	2.22558	4.9082	15.5069	26.8037	49.1172
68.14	2.2334	4.91992	15.5069	26.833	49.1328
68.24	2.26464	4.93164	15.5713	26.8916	49.258
68.34	2.25292	4.93946	15.583	26.9209	49.3124
68.44	2.28418	4.95508	15.6299	26.9854	49.4376
68.54	2.28028	4.97852	15.6885	27.0439	49.5312
68.64	2.26074	4.99804	15.6768	27.0908	49.6172
68.74	2.26856	4.99024	15.6709	27.1143	49.7108
68.84	2.26074	4.9668	15.6768	27.1494	49.7736
68.94	2.28028	4.97852	15.7178	27.1904	49.8908
69.04	2.28028	4.99804	15.7178	27.208	49.9492
69.14	2.26074	4.99804	15.7178	27.2549	50.008
69.24	2.26074	4.99804	15.7471	27.2842	50.086
69.34	2.25684	4.99804	15.7822	27.3486	50.1564
69.44	2.24512	5.02148	15.8115	27.3662	50.2108
69.54	2.26464	5.02148	15.8408	27.4072	50.3592
69.64	2.24512	5.04882	15.8408	27.4365	50.414
69.74	2.2334	5.06054	15.8701	27.4512	50.492
69.84	2.26464	5.06054	15.9287	27.4892	50.5936
69.94	2.26464	5.08008	15.958	27.5537	50.6484
70.04	2.24512	5.0996	15.9697	27.583	50.7344
70.14	2.2295	5.0996	16.0283	27.6416	50.828
70.24	2.22168	5.0879	16.0459	27.6709	50.9688
70.34	2.2412	5.10742	16.0752	27.7295	51.078
70.44	2.2412	5.13868	16.1045	27.7764	51.1328
70.54	2.24122	5.13086	16.1338	27.8174	51.25
70.64	2.24122	5.13868	16.1338	27.8525	51.328
70.74	2.24122	5.11914	16.1631	27.9111	51.4376
70.84	2.2334	5.11914	16.1806	27.917	51.5156
70.94	2.22168	5.11914	16.1631	27.9111	51.5704
71.04	2.22168	5.11914	16.1631	27.958	51.5936
71.14	2.22558	5.11914	16.2334	27.9756	51.6952
71.24	2.24512	5.11914	16.2627	28.0342	51.8204
71.34	2.22558	5.13868	16.2627	28.0635	51.8828
71.44	2.22558	5.1621	16.2627	28.0986	51.8984
71.54	2.20606	5.13868	16.2627	28.0869	51.996
71.64	2.2334	5.13868	16.3037	28.1396	52.1092
71.74	2.26464	5.16602	16.3799	28.2158	52.25
71.84	2.24122	5.19726	16.3799	28.2451	52.2892
71.94	2.26074	5.20704	16.4092	28.292	52.3908
72.04	2.2334	5.2207	16.3975	28.292	52.3908
72.14	2.22168	5.2129	16.4092	28.3037	52.4376
72.24	2.24122	5.20118	16.4385	28.3506	52.5312
72.34	2.2412	5.2207	16.4678	28.3916	52.6484
72.44	2.22168	5.24024	16.4678	28.4268	52.7656
72.54	2.22168	5.2207	16.4971	28.4561	52.836
72.64	2.20214	5.2207	16.4971	28.4707	52.8516
72.74	2.22168	5.20118	16.4971	28.5088	53.008
72.84	2.20214	5.22852	16.5264	28.5381	53.0704
72.94	2.19434	5.23242	16.5146	28.5439	53.1172
73.04	2.21386	5.2207	16.5322	28.6025	53.164
73.14	2.22558	5.24414	16.5322	28.6377	53.2188
73.24	2.22558	5.2246	16.5615	28.667	53.2968
73.34	2.21778	5.2246	16.5908	28.6846	53.3752
73.44	2.20606	5.2246	16.5908	28.667	53.4844
73.54	2.22558	5.20508	16.6201	28.7139	53.578
73.64	2.22558	5.2246	16.6494	28.7549	53.6564
73.74	2.22558	5.2246	16.6494	28.7842	53.6796
73.84	2.22558	5.25196	16.708	28.8779	53.7616
73.94	2.22558	5.2832	16.708	28.9072	53.7736
74.04	2.24512	5.26368	16.7607	28.9951	53.8908
74.14	2.25292	5.2832	16.7549	29.0244	53.9844
74.24	2.28418	5.29102	16.8018	29.083	54.1092
74.34	2.27636	5.30274	16.8311	29.083	54.172
74.44	2.28418	5.30274	16.8604	29.1416	54.2736
74.54	2.28418	5.32226	16.8896	29.1592	54.328
74.64	2.28418	5.31446	16.9189	29.1709	54.3908
74.74	2.30372	5.32226	16.9482	29.2295	54.492
74.84	2.30372	5.36132	16.9482	29.2529	54.6092
74.94	2.32324	5.36132	17.0068	29.2939	54.7108
75.04	2.32324	5.38086	17.0069	29.3233	54.7656
75.14	2.32324	5.38086	17.042	29.3584	54.8984
75.24	2.32324	5.4043	17.0713	29.3877	54.9608
75.34	2.32324	5.4043	17.0713	29.4463	55.0156
75.44	2.31544	5.4043	17.0889	29.4639	55.078
75.54	2.32324	5.39648	17.1006	29.4932	55.164
75.64	2.34278	5.4043	17.1299	29.54	55.258
75.74	2.34278	5.42382	17.1592	29.5986	55.3204
75.84	2.34278	5.4043	17.1885	29.6279	55.3592
75.94	2.32324	5.42382	17.1885	29.6572	55.422
76.04	2.32324	5.42382	17.1768	29.6748	55.4844
76.14	2.32324	5.41602	17.1826	29.6455	55.5
76.24	2.34278	5.38476	17.1944	29.7158	55.5976
76.34	2.32324	5.42382	17.1944	29.751	55.6484
76.44	2.32324	5.4043	17.2236	29.8096	55.672
76.54	2.34278	5.4043	17.2354	29.8535	55.8124
76.64	2.32324	5.42382	17.2822	29.8623	55.8752
76.74	2.32324	5.43164	17.2705	29.8916	55.9296
76.84	2.30372	5.44336	17.2822	29.9209	56.0156
76.94	2.30372	5.44336	17.3115	29.9502	56.078
77.04	2.32324	5.4629	17.3701	30.0087	56.172
77.14	2.34278	5.4629	17.4111	30.0732	56.2344
77.24	2.30372	5.48242	17.4287	30.0615	56.25
77.34	2.30372	5.4629	17.458	30.0732	56.2968
77.44	2.3037	5.44336	17.4873	30.1317	56.3984
77.54	2.30372	5.4629	17.5166	30.1611	56.4532
77.64	2.28418	5.4629	17.5459	30.2079	56.492
77.74	2.3037	5.4707	17.5752	30.249	56.5936
77.84	2.26466	5.49414	17.5811	30.255	56.5704
77.94	2.28418	5.4629	17.5986	30.3135	56.6408
78.04	2.292	5.48242	17.6279	30.3897	56.758
78.14	2.2959	5.49414	17.6631	30.4248	56.8436
78.24	2.26466	5.49804	17.6455	30.4071	56.8788
78.34	2.28418	5.48632	17.7041	30.4659	56.9764
78.44	2.28028	5.50586	17.7451	30.495	57.0312
78.54	2.2959	5.51368	17.8213	30.5538	57.172
78.64	2.292	5.52148	17.8213	30.5655	57.25
78.74	2.30372	5.52148	17.8506	30.6651	57.3672
78.84	2.30372	5.54102	17.8681	30.6768	57.4532
78.94	2.28418	5.52148	17.8916	30.7353	57.5156
79.04	2.28418	5.52148	17.9678	30.7938	57.6092
79.14	2.27246	5.54102	17.9678	30.8349	57.664
79.24	2.28418	5.54882	18.0146	30.8817	57.7108
79.34	2.25294	5.56836	18.0205	30.8994	57.758
79.44	2.2705	5.56446	18.0205	30.9111	57.8516
79.54	2.26466	5.56054	18.0146	30.9405	57.9296
79.64	2.28418	5.54102	18.0791	31.005	58.0312
79.74	2.26466	5.56836	18.0615	31.0341	58.0936
79.84	2.26464	5.58008	18.0908	31.0929	58.1952
79.94	2.26464	5.5996	18.1201	31.122	58.25
80.04	2.26856	5.5996	18.1846	31.1454	58.336
80.14	2.26856	5.62304	18.1846	31.1571	58.3752
80.24	2.28808	5.60352	18.2139	31.2159	58.4844
80.34	2.28808	5.62304	18.2725	31.2744	58.578
80.44	2.28028	5.64258	18.2607	31.2921	58.586
80.54	2.2959	5.63476	18.3135	31.3155	58.6328
80.64	2.2998	5.63086	18.3486	31.3857	58.758
80.74	2.28808	5.63476	18.3311	31.3974	58.8204
80.84	2.30762	5.63086	18.3604	31.4562	58.922
80.94	2.32714	5.6621	18.3896	31.4853	58.9764
81.04	2.32716	5.6621	18.4189	31.503	59.0936
81.14	2.34668	5.6621	18.4482	31.5147	59.1524
81.24	2.34668	5.6621	18.4482	31.5732	59.2108
81.34	2.3545	5.68164	18.4775	31.6026	59.2892
81.44	2.36622	5.68164	18.5127	31.6554	59.3672
81.54	2.39356	5.68164	18.5537	31.6788	59.5
81.64	2.38574	5.68946	18.5713	31.755	59.5624
81.74	2.40918	5.7207	18.6358	31.7784	59.6796
81.84	2.4287	5.7246	18.6767	31.8312	59.7344
81.94	2.42872	5.74414	18.7119	31.9071	59.8124
82.04	2.44824	5.74414	18.7354	31.9248	59.8908
82.14	2.44824	5.76368	18.7822	31.9365	59.9296
82.24	2.46778	5.76368	18.7998	31.995	60.0312
82.34	2.45214	5.7832	18.7939	32.0361	60.0704
82.44	2.50684	5.79102	18.8701	32.1183	60.172
82.54	2.50292	5.8418	18.8994	32.1768	60.2892
82.64	2.52636	5.86132	18.8994	32.1915	60.3124
82.74	2.52246	5.8496	18.9287	32.2296	60.4064
82.84	2.52246	5.87304	18.9141	32.247	60.492
82.94	2.53418	5.86132	18.9229	32.2881	60.5548
83.04	2.5459	5.88086	18.9873	32.3526	60.578
83.14	2.5537	5.9043	18.999	32.3937	60.672
83.24	2.57324	5.88868	19.0166	32.4756	60.7188
83.34	2.56542	5.9004	19.0166	32.505	60.7344
83.44	2.56542	5.93164	19.0166	32.4933	60.8124
83.54	2.58496	5.91992	19.0752	32.5341	60.9376
83.64	2.59278	5.93164	19.0635	32.5518	61
83.74	2.6045	5.91992	19.0459	32.5341	61.0548
83.84	2.59668	5.91992	19.0928	32.6103	61.1172
83.94	2.58496	5.93164	19.0752	32.622	61.1564
84.04	2.6123	5.91992	19.1162	32.6865	61.2736
84.14	2.62402	5.94726	19.1631	32.7159	61.3752
84.24	2.62402	5.95898	19.2041	32.7744	61.4764
84.34	2.64356	6.00196	19.2217	32.8212	61.492
84.44	2.6748	6.00196	19.2686	32.8917	61.6092
84.54	2.65136	6.04102	19.251	32.9091	61.6756
84.64	2.66308	6.04102	19.251	32.9208	61.6876
84.74	2.65528	6.04102	19.251	32.9502	61.75
84.84	2.62402	6.04102	19.251	32.9853	61.7656
84.94	2.62402	6.04102	19.2861	33.003	61.8436
85.04	2.63184	6.04102	19.2861	33.0147	61.8752
85.14	2.64356	6.04102	19.3271	33.0558	61.9452
85.24	2.64356	6.04882	19.3447	33.1173	62.008
85.34	2.6045	6.0371	19.374	33.126	62.0704
85.44	2.62402	6.0371	19.4033	33.1728	62.164
85.54	2.62402	6.05664	19.4033	33.1905	62.25
85.64	2.62402	6.05664	19.4326	33.2196	62.2892
85.74	2.62402	6.08008	19.4326	33.2373	62.3672
85.84	2.63184	6.05664	19.4326	33.249	62.4452
85.94	2.64746	6.05664	19.4678	33.3135	62.5156
86.04	2.62988	6.10352	19.4824	33.3573	62.5508
86.14	2.65136	6.11328	19.5615	33.4365	62.7032
86.24	2.65918	6.14648	19.5615	33.4542	62.7264
86.34	2.64746	6.14648	19.5908	33.4716	62.742
86.44	2.64746	6.14648	19.6201	33.5187	62.8592
86.54	2.68652	6.17382	19.6787	33.5595	62.922
86.64	2.667	6.19726	19.6787	33.5772	62.9844
86.74	2.68652	6.18554	19.7373	33.6183	63.0624
86.84	2.68652	6.18164	19.7549	33.6651	63.2188
86.94	2.69434	6.20118	19.7725	33.6768	63.258
87.04	2.70606	6.20118	19.7725	33.7062	63.3204
87.14	2.70606	6.20898	19.8311	33.7647	63.422
87.24	2.72558	6.23242	19.8604	33.8466	63.4608
87.34	2.72558	6.24024	19.9014	33.8292	63.5392
87.44	2.72558	6.24024	19.9482	33.9054	63.5976
87.54	2.71778	6.26758	19.9483	33.9171	63.6484
87.64	2.7295	6.2793	19.9717	33.9813	63.7736
87.74	2.70996	6.2832	19.9541	34.0107	63.8048
87.84	2.70996	6.2832	19.9541	34.0605	63.8204
87.94	2.69042	6.2754	19.9541	34.0692	63.8592
88.04	2.70996	6.26368	20.0127	34.128	63.9376
88.14	2.70996	6.26368	20.0127	34.1865	64
88.24	2.70996	6.26368	20.042	34.245	64.0936
88.34	2.70996	6.29102	20.0713	34.2627	64.1408
88.44	2.7295	6.30274	20.1006	34.3038	64.2188
88.54	2.7373	6.32226	20.1006	34.3389	64.2968
88.64	2.76856	6.31446	20.1592	34.3974	64.3592
88.74	2.76856	6.32226	20.1592	34.3974	64.4532
88.84	2.78808	6.32226	20.2178	34.4442	64.492
88.94	2.78808	6.32226	20.2295	34.4562	64.578
89.04	2.80762	6.3418	20.2764	34.5147	64.6408
89.14	2.81542	6.36132	20.3056	34.5438	64.6564
89.24	2.82714	6.36132	20.3056	34.5615	64.6952
89.34	2.81934	6.36132	20.3408	34.5732	64.7736
89.44	2.78418	6.36132	20.3408	34.6026	64.8124
89.54	2.8037	6.36132	20.3701	34.6317	64.922
89.64	2.77442	6.38086	20.3262	34.6524	64.8788
89.74	2.78028	6.35156	20.335	34.6788	64.9688
89.84	2.78028	6.3379	20.3643	34.7196	65.008
89.94	2.8037	6.3379	20.3877	34.7724	65.1172
90.04	2.80372	6.36132	20.3701	34.7841	65.1328
90.14	2.82324	6.36132	20.4287	34.8429	65.258
90.24	2.85058	6.38086	20.458	34.8954	65.3752
90.34	2.8545	6.38086	20.458	34.9071	65.4532
90.44	2.85058	6.38086	20.458	34.9365	65.492
90.54	2.88184	6.38086	20.5166	34.995	65.5936
90.64	2.88184	6.4004	20.5283	35.0127	65.5704
90.74	2.8623	6.4004	20.5459	35.0244	65.6564
90.84	2.88184	6.4004	20.6045	35.1123	65.7736
90.94	2.90136	6.4004	20.6338	35.1768	65.8516
91.04	2.91308	6.41992	20.6221	35.1504	65.8944
91.14	2.88184	6.4121	20.6162	35.1708	65.8828
91.24	2.88184	6.4004	20.6631	35.2002	65.9884
91.34	2.88184	6.4004	20.6806	35.2587	66.0936
91.44	2.88184	6.41992	20.6631	35.3058	66.1524
91.54	2.88184	6.41992	20.6631	35.3175	66.2032
91.64	2.90918	6.41992	20.7217	35.3466	66.2812
91.74	2.91308	6.41992	20.7217	35.376	66.3672
91.84	2.90136	6.41992	20.7217	35.3994	66.4064
91.94	2.90136	6.41992	20.751	35.4111	66.4452
92.04	2.9248	6.41992	20.7569	35.505	66.5312
92.14	2.93262	6.44336	20.7569	35.5224	66.6092
92.24	2.93652	6.43554	20.7861	35.5341	66.6876
92.34	2.9248	6.42382	20.8154	35.5929	66.7736
92.44	2.9248	6.42382	20.8564	35.6103	66.8124
92.54	2.94434	6.44336	20.9033	35.6571	66.8752
92.64	2.9248	6.44336	20.874	35.6571	66.8908
92.74	2.94434	6.42382	20.9385	35.7159	66.9688
92.84	2.94434	6.44336	20.9385	35.745	67.0312
92.94	2.94434	6.4629	20.9385	35.7627	67.0936
93.04	2.94434	6.4629	20.9678	35.8038	67.172
93.14	2.94434	6.48242	20.9971	35.8623	67.2108
93.24	2.94434	6.48242	20.9971	35.8974	67.2736
93.34	2.96386	6.4629	21.0264	35.9562	67.328
93.44	2.96386	6.48242	21.0556	35.9853	67.3984
93.54	2.9834	6.48242	21.1143	36.0438	67.492
93.64	2.97168	6.47852	21.1143	36.0732	67.5312
93.74	3.00292	6.47852	21.1143	36.1026	67.5704
93.84	2.97558	6.47852	21.1143	36.1611	67.6328
93.94	2.9912	6.48632	21.1436	36.1788	67.7264
94.04	3.00292	6.51758	21.1436	36.1905	67.7736
94.14	3.00292	6.51758	21.1582	36.1788	67.8124
94.24	3.00294	6.51758	21.208	36.1962	67.8908
94.34	3.02246	6.51758	21.2373	36.2256	67.992
94.44	3.02246	6.5371	21.2666	36.3135	68.086
94.54	3.02246	6.55664	21.2666	36.3282	68.1328
94.64	3.02246	6.5371	21.2666	36.3369	68.1328
94.74	3.0459	6.5371	21.3311	36.4014	68.258
94.84	3.02636	6.58008	21.3018	36.4308	68.2812
94.94	3.02636	6.56054	21.2871	36.495	68.336
95.04	3.01074	6.56054	21.3076	36.5244	68.3908
95.14	3.00292	6.56836	21.3252	36.5538	68.4532
95.24	3.02246	6.58008	21.2959	36.5829	68.5
95.34	3.02246	6.56054	21.3252	36.63	68.6172
95.44	3.02246	6.58008	21.3545	36.6417	68.6408
95.54	3.042	6.58008	21.3984	36.6708	68.6952
95.64	3.042	6.5996	21.4189	36.7002	68.7736
95.74	3.05176	6.5996	21.4336	36.7149	68.8712
95.84	3.06542	6.60938	21.4541	36.7647	68.9452
95.94	3.08496	6.62304	21.4834	36.8292	69.0236
96.04	3.08496	6.64258	21.4834	36.8175	69.1016
96.14	3.08496	6.64258	21.4834	36.8583	69.1408
96.24	3.09668	6.62304	21.542	36.9171	69.258
96.34	3.05372	6.6621	21.5127	36.9171	69.3048
96.44	3.06542	6.6504	21.542	36.9462	69.3244
96.54	3.05762	6.6621	21.5713	36.9756	69.414
96.64	3.0459	6.68164	21.5713	37.005	69.4532
96.74	3.06542	6.68164	21.6006	37.0635	69.5704
96.84	3.06542	6.70118	21.5859	37.0518	69.6092
96.94	3.08496	6.68164	21.5947	37.128	69.7188
97.04	3.08496	6.70118	21.6299	37.128	69.7736
97.14	3.09278	6.7207	21.6592	37.1865	69.836
97.24	3.1045	6.7207	21.6475	37.2159	69.8908
97.34	3.12792	6.7207	21.665	37.3095	70.0156
97.44	3.12792	6.74414	21.665	37.3389	70.0624
97.54	3.14746	6.7246	21.7061	37.3974	70.1252
97.64	3.15528	6.76368	21.7529	37.3974	70.1796
97.74	3.13966	6.76368	21.7529	37.4502	70.2188
97.84	3.15528	6.74414	21.8115	37.4619	70.2968
97.94	3.167	6.76368	21.7822	37.4913	70.3752
98.04	3.18652	6.76368	21.8115	37.5498	70.4452
98.14	3.167	6.7832	21.7998	37.5792	70.4608
98.24	3.18652	6.76368	21.8408	37.626	70.5392
98.34	3.18652	6.79102	21.8408	37.6377	70.5624
98.44	3.20606	6.80274	21.8701	37.7256	70.6564
98.54	3.20606	6.82226	21.8701	37.7256	70.6564
98.64	3.20606	6.82226	21.8994	37.8192	70.758
98.74	3.20606	6.8418	21.8994	37.8486	70.7812
98.84	3.22558	6.82226	21.9287	37.8954	70.8984
98.94	3.23926	6.8418	21.9785	37.9278	71.004
99.04	3.23536	6.85546	21.9727	37.9512	71.0352
99.14	3.24902	6.85156	21.9814	37.9599	71.086
99.24	3.26074	6.86524	22.0225	38.001	71.1796
99.34	3.26856	6.87304	22.0517	38.0595	71.2656
99.44	3.28808	6.92382	22.1104	38.1183	71.3828
99.54	3.2959	6.92382	22.1104	38.1534	71.4608
99.64	3.32714	6.89648	22.1104	38.1681	71.5196
99.74	3.30762	6.93164	22.1396	38.1768	71.5704
99.84	3.30762	6.92382	22.1396	38.1768	71.6172
99.94	3.3037	6.92382	22.1982	38.2353	71.7344
100.04	3.30372	6.94336	22.2275	38.2647	71.8516
100.14	3.30372	6.9629	22.2569	38.3232	71.8752
100.24	3.32324	6.9629	22.2861	38.3817	71.9296
100.34	3.34278	6.98242	22.3506	38.4405	72.008
100.44	3.3662	6.99414	22.3857	38.505	72.1016
100.54	3.34668	7.00586	22.415	38.5401	72.164
100.64	3.35644	6.99024	22.4297	38.5722	72.1992
100.74	3.34278	6.99218	22.4268	38.5635	72.25
100.84	3.3623	6.97852	22.4385	38.622	72.328
100.94	3.37402	6.99804	22.5088	38.6514	72.3908
101.04	3.3623	7.01758	22.5264	38.6808	72.4064
101.14	3.38184	6.99804	22.585	38.7393	72.5312
101.24	3.3623	7.01758	22.585	38.7687	72.5704
101.34	3.3623	7.01758	22.6318	38.8272	72.672
101.44	3.38184	7.01758	22.6553	38.8563	72.7264
101.54	3.3623	7.0371	22.6729	38.8917	72.8048
101.64	3.3623	7.01758	22.6904	38.9502	72.8908
101.74	3.3584	7.0371	22.6963	39.003	72.9452
101.84	3.3662	7.05274	22.708	39.003	73.0156
101.94	3.35058	7.04102	22.749	39.0264	73.0936
102.04	3.37402	7.04882	22.7842	39.0909	73.1952
102.14	3.38184	7.07226	22.7959	39.1026	73.258
102.24	3.38184	7.06054	22.7666	39.1611	73.3204
102.34	3.37012	7.04102	22.7666	39.1611	73.3752
102.44	3.3545	7.04102	22.8076	39.2196	73.414
102.54	3.3623	7.04102	22.8545	39.2841	73.5312
102.64	3.35058	7.0371	22.8545	39.3135	73.5508
102.74	3.38184	7.0371	22.9131	39.372	73.6484
102.84	3.3623	7.05664	22.9131	39.4014	73.6876
102.94	3.38184	7.06446	22.9424	39.4893	73.75
103.04	3.40918	7.0957	22.9834	39.5304	73.8204
103.14	3.4287	7.10352	23.0303	39.5772	73.8828
103.24	3.41308	7.11524	23.0303	39.5946	73.922
103.34	3.40136	7.11524	23.0303	39.6123	73.992
103.44	3.40528	7.11524	23.0654	39.6768	74.0548
103.54	3.3955	7.13868	23.1152	39.7206	74.0976
103.64	3.40918	7.14844	23.1357	39.7704	74.1796
103.74	3.38574	7.1621	23.165	39.7704	74.2188
103.84	3.40528	7.14258	23.2061	39.8292	74.242
103.94	3.38574	7.1621	23.2236	39.8583	74.2968
104.04	3.38574	7.1621	23.2236	39.8877	74.3436
104.14	3.41308	7.1543	23.2822	39.9462	74.4452
104.24	3.4248	7.16992	23.2822	39.9813	74.4608
104.34	3.4248	7.18164	23.3232	40.0401	74.578
104.44	3.43652	7.20118	23.3994	40.0986	74.6952
104.54	3.40528	7.2207	23.3877	40.128	74.7188
104.64	3.40528	7.2207	23.3525	40.1571	74.7812
104.74	3.41308	7.2207	23.3819	40.1982	74.836
104.84	3.40528	7.22852	23.4287	40.245	74.922
104.94	3.43262	7.24024	23.458	40.2744	74.9764
105.04	3.4248	7.25976	23.458	40.2921	75
105.14	3.44434	7.25976	23.4873	40.3329	75.0548
105.24	3.44434	7.2793	23.5606	40.3623	75.1408
105.34	3.46386	7.29882	23.5811	40.3623	75.1796
105.44	3.44434	7.29882	23.5811	40.3974	75.2384
105.54	3.44434	7.29102	23.5811	40.4268	75.2892
105.64	3.4248	7.2793	23.5811	40.4562	75.328
105.74	3.44434	7.2793	23.5811	40.4736	75.3672
105.84	3.44434	7.2793	23.6104	40.5147	75.4532
105.94	3.44434	7.29882	23.6396	40.5438	75.492
106.04	3.4248	7.29882	23.625	40.5732	75.5156
106.14	3.44824	7.29882	23.6396	40.6377	75.6172
106.24	3.44824	7.3418	23.6396	40.6728	75.6408
106.34	3.44434	7.3418	23.6982	40.7313	75.6952
106.44	3.44434	7.36132	23.7129	40.7607	75.7344
106.54	3.44434	7.38086	23.7188	40.8192	75.8204
106.64	3.45214	7.38086	23.71	40.8312	75.8752
106.74	3.46386	7.38868	23.7275	40.8663	75.9608
106.84	3.4912	7.4004	23.8008	40.878	76.0156
106.94	3.4834	7.4121	23.8067	40.9071	76.0936
107.04	3.4834	7.4004	23.8213	40.8954	76.1796
107.14	3.50292	7.4004	23.8506	40.9365	76.258
107.24	3.51074	7.41992	23.8916	40.9482	76.3516
107.34	3.51464	7.42774	23.9268	40.9746	76.422
107.44	3.50294	7.43164	23.9092	40.9659	76.414
107.54	3.50292	7.4004	23.9385	40.995	76.4532
107.64	3.50292	7.4004	23.9385	41.0127	76.5392
107.74	3.53028	7.4004	24.0088	41.0361	76.6328
107.84	3.542	7.44726	24.0264	41.0829	76.7344
107.94	3.542	7.45898	24.085	41.13	76.7968
108.04	3.542	7.47852	24.085	41.1417	76.828
108.14	3.56152	7.47852	24.1142	41.2002	76.9532
108.24	3.52246	7.49804	24.0733	41.1885	76.9376
108.34	3.542	7.47852	24.1142	41.2353	77.0156
108.44	3.542	7.49804	24.1143	41.2647	77.0392
108.54	3.59082	7.49804	24.1436	41.3115	77.0936
108.64	3.6045	7.49804	24.1436	41.3232	77.1328
108.74	3.5752	7.49804	24.1611	41.3409	77.172
108.84	3.58886	7.51758	24.1904	41.3643	77.2264
108.94	3.60058	7.5254	24.208	41.4111	77.2736
109.04	3.6045	7.5371	24.2431	41.4639	77.3828
109.14	3.6045	7.55274	24.2725	41.4813	77.422
109.24	3.6084	7.54102	24.29	41.5167	77.4844
109.34	3.58496	7.56054	24.2725	41.5401	77.4804
109.44	3.56542	7.55274	24.2725	41.5254	77.5312
109.54	3.56542	7.54882	24.3018	41.5341	77.5312
109.64	3.58496	7.55274	24.3018	41.5635	77.5704
109.74	3.6123	7.52148	24.3311	41.6514	77.672
109.84	3.62402	7.54882	24.3311	41.6865	77.7344
109.94	3.62402	7.5879	24.3604	41.7159	77.758
110.04	3.6045	7.5918	24.3896	41.7159	77.7736
110.14	3.6045	7.58008	24.3896	41.7627	77.8124
110.24	3.59668	7.58008	24.3896	41.7744	77.8908
110.34	3.58496	7.58008	24.4189	41.7627	77.914
110.44	3.59278	7.58008	24.4306	41.7861	77.9452
110.54	3.58496	7.5879	24.4482	41.8212	78.0156
110.64	3.58496	7.62304	24.4775	41.8038	78.0936
110.74	3.6045	7.62304	24.5068	41.8623	78.1564
110.84	3.58496	7.61132	24.4775	41.8506	78.1328
110.94	3.6045	7.5879	24.5361	41.8623	78.2108
111.04	3.6045	7.61132	24.5069	41.8683	78.2108
111.14	3.59668	7.58008	24.5654	41.8974	78.3204
111.24	3.59278	7.5996	24.5771	41.9268	78.3124
111.34	3.57714	7.60742	24.5713	41.9442	78.3592
111.44	3.57324	7.63476	24.583	41.9853	78.4296
111.54	3.58496	7.60742	24.6006	42.0147	78.4532
111.64	3.6045	7.61914	24.6299	42.0438	78.5704
111.74	3.6045	7.6621	24.6299	42.0732	78.5936
111.84	3.6045	7.6621	24.6592	42.0909	78.6092
111.94	3.62402	7.66992	24.6299	42.1083	78.6408
112.04	3.6045	7.68164	24.6592	42.1083	78.6564
112.14	3.6162	7.67382	24.6768	42.1698	78.7188
112.24	3.6045	7.68164	24.6592	42.1317	78.7188
112.34	3.62402	7.68164	24.6885	42.1905	78.7736
112.44	3.63184	7.69336	24.7295	42.2313	78.8084
112.54	3.65528	7.68946	24.7646	42.2958	78.9064
112.64	3.63184	7.7129	24.7412	42.2784	78.8984
112.74	3.64356	7.68946	24.8056	42.3369	79.0312
112.84	3.64356	7.7207	24.7939	42.372	79.0312
112.94	3.65918	7.72852	24.8115	42.4071	79.1328
113.04	3.64746	7.76368	24.8525	42.4365	79.172
113.14	3.64746	7.76368	24.8701	42.4542	79.2344
113.24	3.62402	7.7832	24.8584	42.4365	79.2968
113.34	3.62402	7.7832	24.8701	42.4659	79.3592
113.44	3.62402	7.79492	24.8701	42.495	79.3752
113.54	3.62402	7.7832	24.8819	42.5244	79.4532
113.64	3.64356	7.7832	24.958	42.5712	79.5624
113.74	3.62402	7.80274	24.958	42.5538	79.578
113.84	3.62402	7.7832	24.9463	42.5538	79.6172
113.94	3.62402	7.80274	24.9697	42.5712	79.6796
114.04	3.62402	7.80274	25.0166	42.6183	79.7188
114.14	3.59668	7.81446	24.9873	42.6474	79.7344
114.24	3.58496	7.79102	24.9873	42.6768	79.8204
114.34	3.56542	7.82226	24.9873	42.6768	79.8828
114.44	3.56542	7.81446	25.0225	42.6942	79.8984
114.54	3.6045	7.82226	25.0517	42.7647	80.0156
114.64	3.58496	7.82226	25.0225	42.7353	80.0156
114.74	3.58496	7.82226	25.0811	42.7821	80.1212
114.84	3.58496	7.8418	25.0928	42.7647	80.1328
114.94	3.6045	7.8418	25.1689	42.8292	80.2344
115.04	3.58496	7.86132	25.1982	42.8466	80.25
115.14	3.6045	7.86132	25.2275	42.8877	80.328
115.24	3.58496	7.8418	25.2275	42.9171	80.414
115.34	3.6045	7.86132	25.2568	42.9756	80.5312
115.44	3.6045	7.88086	25.2861	43.005	80.5936
115.54	3.6045	7.88086	25.3154	43.0341	80.6092
115.64	3.6162	7.88086	25.3857	43.0839	80.7108
115.74	3.6045	7.9004	25.4385	43.122	80.7344
115.84	3.58496	7.9004	25.4385	43.1514	80.7968
115.94	3.58496	7.9004	25.4678	43.1808	80.8516
116.04	3.6045	7.89258	25.4971	43.2276	80.9688
116.14	3.6045	7.9004	25.5264	43.2393	80.992
116.24	3.6045	7.88868	25.5556	43.2687	81.0548
116.34	3.6045	7.9004	25.5556	43.2978	81.1172
116.44	3.62402	7.9004	25.585	43.38	81.2108
116.54	3.62402	7.91992	25.585	43.3917	81.2344
116.64	3.64356	7.93946	25.6318	43.4502	81.336
116.74	3.64356	7.95118	25.585	43.4796	81.3752
116.84	3.64356	7.93946	25.6143	43.5087	81.414
116.94	3.66308	7.94726	25.6729	43.5675	81.5116
117.04	3.64356	7.97852	25.7021	43.5966	81.5236
117.14	3.64356	7.95898	25.7314	43.6317	81.6016
117.24	3.62402	7.95898	25.7197	43.6611	81.6252
117.34	3.64356	7.95898	25.7431	43.6905	81.6876
117.44	3.667	7.95898	25.8311	43.755	81.758
117.54	3.667	7.9629	25.8604	43.7724	81.8124
117.64	3.667	7.9629	25.8896	43.8135	81.8908
117.74	3.64746	7.9629	25.9189	43.8135	81.9764
117.84	3.64746	7.94336	25.9072	43.878	82.0548
117.94	3.63574	7.9629	25.9306	43.9071	82.0936
118.04	3.667	7.95118	25.9482	43.9365	82.172
118.14	3.65528	7.9629	25.9775	43.9542	82.1952
118.24	3.667	7.98242	25.9951	43.9659	82.2108
118.34	3.667	7.98242	25.9893	43.995	82.2968
118.44	3.65528	7.98242	26.0537	44.0421	82.3752
118.54	3.64356	8.00196	26.0713	44.0829	82.414
118.64	3.63184	8.00976	26.083	44.1183	82.492
118.74	3.64356	8.0293	26.1006	44.1768	82.5312
118.84	3.64356	8.04102	26.1006	44.2062	82.5704
118.94	3.64356	8.0332	26.1006	44.2206	82.6564
119.04	3.64356	8.02148	26.1592	44.2881	82.6796
119.14	3.64356	8.04102	26.1592	44.3526	82.7344
119.24	3.64356	8.02148	26.1885	44.4111	82.8516
119.34	3.64356	8.04102	26.2178	44.4405	82.8908
119.44	3.66308	8.04102	26.2471	44.4696	82.9532
119.54	3.64356	8.06054	26.2588	44.5284	82.9688
119.64	3.64356	8.04102	26.2764	44.5458	83.0548
119.74	3.65332	8.04102	26.3203	44.631	83.1524
119.84	3.64746	8.07032	26.3701	44.6865	83.1992
119.94	3.65528	8.08398	26.3994	44.745	83.25
120.04	3.667	8.0918	26.3877	44.7744	83.2892
120.14	3.64746	8.10352	26.3701	44.7921	83.328
120.24	3.667	8.10352	26.3994	44.8329	83.4064
120.34	3.6748	8.0996	26.4404	44.874	83.4688
120.44	3.65528	8.10742	26.4463	44.9091	83.5
120.54	3.63184	8.0996	26.4697	44.9325	83.508
120.64	3.64356	8.10742	26.4873	44.9796	83.5704
120.74	3.62402	8.11914	26.5166	44.9796	83.6092
120.84	3.6045	8.11914	26.4756	45.0438	83.6876
120.94	3.64356	8.11914	26.5049	45.12	83.7736
121.04	3.65918	8.1504	26.5225	45.1377	83.7736
121.14	3.62792	8.16992	26.5518	45.1554	83.8124
121.24	3.65528	8.17382	26.5811	45.1962	83.8984
121.34	3.62794	8.18164	26.54	45.1962	83.8828
121.44	3.64746	8.1621	26.5517	45.255	83.9376
121.54	3.62792	8.18164	26.5811	45.2841	83.9764
121.64	3.62792	8.18164	26.5811	45.3192	84
121.74	3.63574	8.1621	26.6279	45.3603	84.0312
121.84	3.62792	8.16992	26.6455	45.4365	84.0548
121.94	3.64746	8.18164	26.6748	45.495	84.1328
122.04	3.65528	8.20898	26.7041	45.5127	84.1564
122.14	3.64356	8.2207	26.6924	45.5244	84.2188
122.24	3.65136	8.20118	26.7158	45.5067	84.2736
122.34	3.64356	8.20898	26.7334	45.5538	84.336
122.44	3.64356	8.24024	26.7334	45.5655	84.3752
122.54	3.64356	8.2207	26.7627	45.6006	84.4376
122.64	3.64356	8.2129	26.7188	45.5829	84.4532
122.74	3.64356	8.20898	26.7422	45.6183	84.5
122.84	3.62402	8.20118	26.7627	45.6357	84.5624
122.94	3.62402	8.20118	26.7627	45.6183	84.578
123.04	3.64356	8.20118	26.792	45.6768	84.6564
123.14	3.63184	8.19336	26.8037	45.7062	84.7108
123.24	3.64356	8.19726	26.8506	45.7062	84.758
123.34	3.66308	8.2207	26.8506	45.7353	84.7736
123.44	3.6709	8.2207	26.8916	45.8058	84.8672
123.54	3.68262	8.24804	26.9385	45.8232	84.9764
123.64	3.66308	8.25976	26.9385	45.8232	85.0156
123.74	3.66308	8.25976	26.9385	45.8409	85.0352
123.84	3.6709	8.25976	26.9795	45.8349	85.1016
123.94	3.68262	8.26758	26.9971	45.8817	85.164
124.04	3.68262	8.2793	27.0264	45.9111	85.2032
124.14	3.70214	8.2793	27.041	45.9405	85.2892
124.24	3.71192	8.2793	27.0352	45.9903	85.3476
124.34	3.70606	8.28126	27.085	46.0107	85.3984
124.44	3.74512	8.2832	27.1494	46.0692	85.414
124.54	3.72558	8.30274	27.1494	46.0812	85.492
124.64	3.74512	8.30274	27.208	46.1571	85.5704
124.74	3.72558	8.32226	27.208	46.1454	85.5548
124.84	3.72558	8.30274	27.1963	46.1688	85.5704
124.94	3.70606	8.30274	27.208	46.1748	85.6172
125.04	3.70606	8.30274	27.2373	46.1571	85.6952
125.14	3.7334	8.30274	27.3076	46.2276	85.7736
125.24	3.7373	8.33008	27.3135	46.251	85.7968
125.34	3.72558	8.33398	27.3252	46.245	85.7736
125.44	3.72558	8.32226	27.3545	46.245	85.8124
125.54	3.72558	8.3418	27.3896	46.2804	85.8908
125.64	3.72558	8.33398	27.3896	46.3095	85.914
125.74	3.7334	8.33008	27.4014	46.3359	85.9532
125.84	3.7373	8.3496	27.4189	46.3623	86.0548
125.94	3.74902	8.37304	27.4834	46.4268	86.1796
126.04	3.74902	8.38476	27.4834	46.4562	86.2188
126.14	3.76856	8.38476	27.501	46.4442	86.2968
126.24	3.76856	8.38476	27.542	46.4853	86.3204
126.34	3.78808	8.42382	27.5713	46.5147	86.3436
126.44	3.7959	8.42382	27.583	46.5147	86.3984
126.54	3.80762	8.42382	27.6299	46.5498	86.4608
126.64	3.82714	8.42382	27.6592	46.6083	86.5392
126.74	3.80762	8.44336	27.6885	46.6377	86.5624
126.84	3.82714	8.44336	27.7471	46.6845	86.6172
126.94	3.82714	8.4629	27.7471	46.6962	86.6564
127.04	3.82716	8.4629	27.7471	46.755	86.6952
127.14	3.84668	8.4707	27.7764	46.7724	86.8204
127.24	3.84668	8.49414	27.7764	46.7841	86.8984
127.34	3.83886	8.49024	27.8115	46.8135	86.922
127.44	3.84668	8.50196	27.8291	46.8663	86.9764
127.54	3.84668	8.52148	27.8233	46.9071	86.9764
127.64	3.8662	8.52148	27.8994	46.9659	87.0548
127.74	3.86622	8.54102	27.8994	46.995	87.0936
127.84	3.88574	8.54102	27.9287	47.0538	87.172
127.94	3.89356	8.56054	27.9404	47.0946	87.2344
128.04	3.89746	8.56836	27.9756	47.1183	87.2812
128.14	3.90528	8.56446	27.9873	47.1474	87.3164
128.24	3.87794	8.56054	28.0166	47.1474	87.3672
128.34	3.90918	8.56054	28.1104	47.2296	87.492
128.44	3.90918	8.60352	28.1396	47.2704	87.5312
128.54	3.90918	8.62304	28.1396	47.2704	87.6172
128.64	3.9287	8.62304	28.1689	47.3292	87.6564
128.74	3.97558	8.64258	28.2275	47.3583	87.7344
128.84	3.9795	8.68164	28.2275	47.4171	87.8516
128.94	3.9873	8.70118	28.2569	47.4462	87.8908
129.04	4.01464	8.70118	28.2686	47.5167	87.9688
129.14	3.99902	8.72852	28.2744	47.5575	87.992
129.24	3.9873	8.73242	28.2686	47.5692	88.0548
129.34	3.99512	8.7207	28.3271	47.6103	88.0704
129.44	4.03418	8.7207	28.374	47.6865	88.1952
129.54	4.05762	8.7207	28.3916	47.7333	88.2344
129.64	4.0459	8.74024	28.3447	47.745	88.25
129.74	4.09668	8.74024	28.3916	47.8212	88.3516
129.84	4.08886	8.75196	28.4092	47.8536	88.3984
129.94	4.08106	8.76368	28.4385	47.8359	88.4376
130.04	4.06934	8.75586	28.4385	47.8683	88.4608
130.14	4.06934	8.76368	28.4385	47.8887	88.5
130.24	4.0459	8.74414	28.4385	47.8974	88.5236
130.34	4.0459	8.74414	28.4385	47.8974	88.5392
130.44	4.07324	8.74414	28.4385	47.9268	88.6172
130.54	4.07714	8.76368	28.4531	47.9562	88.6564
130.64	4.06542	8.75196	28.459	47.9736	88.6952
130.74	4.07324	8.76368	28.4238	47.9853	88.7812
130.84	4.09668	8.74414	28.4736	48.0147	88.8204
130.94	4.1045	8.76368	28.5029	48.0438	88.8828
131.04	4.1045	8.79102	28.4736	48.0732	88.8984
131.14	4.12402	8.80274	28.5322	48.1317	89.0156
131.24	4.12402	8.82226	28.5029	48.1611	89.0156
131.34	4.14356	8.82226	28.5322	48.1905	89.0936
131.44	4.16308	8.8496	28.5615	48.2433	89.1564
131.54	4.16308	8.86132	28.5908	48.2256	89.2188
131.64	4.16308	8.86132	28.5908	48.255	89.2968
131.74	4.16308	8.86132	28.6201	48.3135	89.3752
131.84	4.18652	8.88086	28.6553	48.3486	89.5
131.94	4.18652	8.88476	28.6553	48.3369	89.5236
132.04	4.18652	8.89258	28.626	48.3486	89.5392
132.14	4.167	8.88086	28.626	48.3486	89.578
132.24	4.19434	8.88086	28.6963	48.3897	89.66
132.34	4.19824	8.9082	28.7021	48.4248	89.6796
132.44	4.20606	8.9121	28.7139	48.4659	89.7344
132.54	4.18652	8.92774	28.7256	48.495	89.7344
132.64	4.20606	8.9121	28.7607	48.6006	89.836
132.74	4.18652	8.91992	28.7842	48.6357	89.8516
132.84	4.19824	8.92774	28.8194	48.6768	89.914
132.94	4.18652	8.95118	28.8018	48.6942	89.9296
133.04	4.18652	8.93946	28.8311	48.7353	90
133.14	4.19434	8.95898	28.8311	48.7353	90.0156
133.24	4.21778	8.93946	28.8604	48.7938	90.0936
133.34	4.21386	8.95898	28.8604	48.8115	90.1172
133.44	4.20606	8.95898	28.8604	48.8232	90.1328
133.54	4.20606	8.96876	28.8604	48.8232	90.2108
133.64	4.20606	8.98242	28.8896	48.87	90.2736
133.74	4.20606	9.00196	28.8779	48.9171	90.2968
133.84	4.20606	8.98242	28.8604	48.9171	90.3204
133.94	4.20606	8.98242	28.8721	48.9756	90.3752
134.04	4.167	8.98242	28.8779	48.9639	90.3436
134.14	4.18652	8.95508	28.9014	49.0458	90.4296
134.24	4.18652	8.97852	28.9365	49.0812	90.4376
134.34	4.21386	8.99414	28.96	49.128	90.5468
134.44	4.20214	8.99024	28.9775	49.1865	90.5548
134.54	4.18262	9.00196	29.0069	49.245	90.578
134.64	4.18262	8.98242	28.9951	49.2744	90.6016
134.74	4.19824	8.98242	29.0361	49.3272	90.6876
134.84	4.18652	8.99804	29.0186	49.3389	90.7228
134.94	4.18652	8.98632	29.0479	49.3563	90.7736
135.04	4.18652	9.01368	29.0771	49.4034	90.8984
135.14	4.21386	9.04492	29.1357	49.4619	90.9376
135.24	4.20606	9.04492	29.1358	49.4619	91
135.34	4.22558	9.04492	29.1944	49.5204	91.0548
135.44	4.21778	9.08398	29.209	49.5939	91.1564
135.54	4.22558	9.10352	29.2471	49.6317	91.172
135.64	4.22558	9.13086	29.2471	49.6611	91.2108
135.74	4.24512	9.13476	29.2764	49.6905	91.336
135.84	4.22558	9.14258	29.3056	49.7196	91.3592
135.94	4.22558	9.14258	29.3056	49.7079	91.3752
136.04	4.22558	9.14258	29.335	49.755	91.3984
136.14	4.22558	9.12304	29.3643	49.755	91.414
136.24	4.21778	9.14258	29.3643	49.7841	91.4532
136.34	4.18652	9.14258	29.3936	49.8135	91.5156
136.44	4.20996	9.12304	29.4287	49.8663	91.578
136.54	4.2373	9.14648	29.4931	49.9071	91.7032
136.64	4.24902	9.18554	29.4931	49.9482	91.7656
136.74	4.22558	9.18554	29.5225	49.995	91.7812
136.84	4.22558	9.1582	29.5225	49.9833	91.8592
136.94	4.24512	9.14648	29.5694	49.995	91.9376
137.04	4.24512	9.16602	29.5518	50.0244	92.008
137.14	4.2334	9.16602	29.5811	50.0595	92.0236
137.24	4.24512	9.14648	29.5811	50.0889	92.1016
137.34	4.24512	9.16602	29.6104	50.0889	92.1408
137.44	4.24512	9.14648	29.6396	50.1183	92.1796
137.54	4.26464	9.14648	29.6806	50.1591	92.3008
137.64	4.26464	9.17382	29.6982	50.2062	92.336
137.74	4.24512	9.18554	29.6983	50.2062	92.414
137.84	4.26464	9.18554	29.7569	50.2647	92.4764
137.94	4.26464	9.19726	29.7861	50.2938	92.492
138.04	4.26464	9.18554	29.7861	50.3232	92.5704
138.14	4.24512	9.18554	29.7861	50.3232	92.6092
138.24	4.26464	9.16602	29.8506	50.3817	92.6952
138.34	4.26464	9.18554	29.8506	50.4054	92.7344
138.44	4.26464	9.18554	29.8799	50.3877	92.758
138.54	4.26464	9.18554	29.9092	50.4171	92.8124
138.64	4.26464	9.18164	29.9209	50.4171	92.8516
138.74	4.27636	9.18164	29.9678	50.4639	92.9296
138.84	4.27246	9.20118	29.9971	50.4696	92.9844
138.94	4.28418	9.20898	30.0264	50.5224	93.0468
139.04	4.28418	9.2207	30.0264	50.505	93.0312
139.14	4.30762	9.24414	30.0615	50.5692	93.1016
139.24	4.32714	9.24414	30.0909	50.628	93.1796
139.34	4.30762	9.26368	30.12	50.6397	93.2188
139.44	4.30762	9.2871	30.12	50.6865	93.2188
139.54	4.31542	9.27734	30.1317	50.7276	93.2736
139.64	4.32714	9.27148	30.1494	50.745	93.336
139.74	4.33886	9.2832	30.1962	50.8212	93.3984
[truncated: 3,605 more rows]
