# Supplementary material for: Myosin light chain 3 serves as a receptor for nervous necrosis virus entry into host cells via the macropinocytosis pathway
Source: eLife journal article supplement (doi:10.7554/elife.104772), 2024-12-17
Supplement: fig2-data2 [file elife-104772-fig2-data2-v1.pdf]

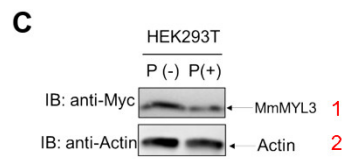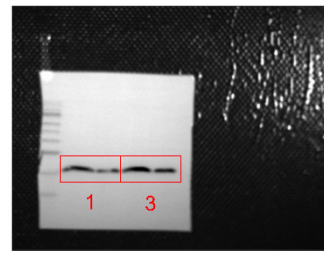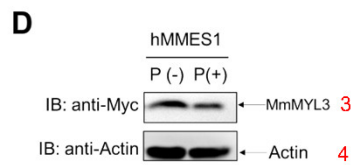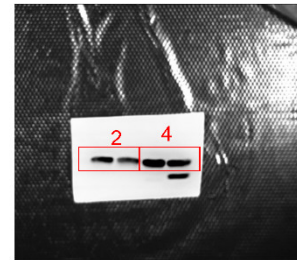

Figure 2, Source Data 1. Original membranes corresponding to Figure 2C and D. The red box marked as 1 represents the MmMYL3 of HEK293T cells. The red box marked as 2 represents the actin of HEK293T cells. The red box marked as 3 represents the MmMYL3 of hMMES1 cells. The red box marked as 4 represents the MmMYL3 of hMMES1 cells.
