# Supplementary material for: Myosin light chain 3 serves as a receptor for nervous necrosis virus entry into host cells via the macropinocytosis pathway
Source: eLife journal article supplement (doi:10.7554/elife.104772), 2024-12-17
Supplement: fig2-data3 [file elife-104772-fig2-data3-v1.zip]

## Sheet: Sheet1
Original data of Figure 2E
Distance (pixels)	Gray value (CP)	Gray value (MmMYL3)
0	3.5415	0.8585
0.00671	3.813	0.9187
0.01342	3.6715	0.9398
0.02013	3.652	0.9366
0.02685	3.8764	0.8862
0.03356	4.1301	0.8358
0.04027	3.9236	0.8114
0.04698	3.5252	0.8114
0.05369	3.4585	0.787
0.0604	3.7187	0.7041
0.06711	4.0163	0.613
0.07383	4.3285	0.5463
0.08054	4.478	0.5122
0.08725	4.4959	0.4992
0.09396	4.4894	0.5089
0.10067	4.426	0.5187
0.10738	4.3528	0.5642
0.11409	4.2602	0.6179
0.12081	4.4423	0.6504
0.12752	4.9496	0.6634
0.13423	5.2358	0.6959
0.14094	5.3073	0.7317
0.14765	5.5138	0.8114
0.15436	5.7919	0.8585
0.16107	5.9919	0.8894
0.16779	6.1252	0.8943
0.1745	6.187	0.8943
0.18121	6.2943	0.8878
0.18792	6.7106	0.8472
0.19463	7.4098	0.865
0.20134	7.7984	0.9593
0.20805	7.7496	1.0992
0.21477	7.4585	1.2374
0.22148	6.9691	1.3333
0.22819	6.5707	1.2911
0.2349	6.3041	1.1902
0.24161	6.2585	1.2228
0.24832	6.3691	1.3106
0.25503	6.8146	1.3138
0.26174	7.7268	1.2862
0.26846	8.3447	1.2943
0.27517	8.678	1.3675
0.28188	8.9171	1.4179
0.28859	9.0211	1.3886
0.2953	8.9528	1.3301
0.30201	8.4764	1.239
0.30872	7.465	1.1772
0.31544	6.3837	1.2114
0.32215	5.548	1.3089
0.32886	5.3366	1.4309
0.33557	5.4992	1.574
0.34228	5.7431	1.7154
0.34899	5.7919	1.8439
0.3557	5.6667	1.9106
0.36242	5.5236	1.8862
0.36913	5.6016	1.8764
0.37584	5.7805	1.8748
0.38255	5.865	1.8862
0.38926	5.9122	1.8927
0.39597	5.9203	1.9528
0.40268	5.9236	2.1252
0.4094	6.0358	2.3837
0.41611	6.1821	2.7431
0.42282	6.2098	3.1057
0.42953	6.187	3.3528
0.43624	6.2618	3.4797
0.44295	6.3854	3.535
0.44966	6.3333	3.561
0.45638	6.2309	3.6927
0.46309	6.5301	3.8699
0.4698	7.1203	3.9821
0.47651	7.4927	3.9919
0.48322	7.7447	4.0016
0.48993	8.1041	4.0293
0.49664	8.5837	4.2276
0.50336	9.0764	4.5919
0.51007	9.5301	5.0585
0.51678	10.0992	5.4602
0.52349	10.6748	5.8748
0.5302	10.826	6.3967
0.53691	10.6244	6.8927
0.54362	10.5805	7.1626
0.55034	10.7886	7.3203
0.55705	10.9805	7.5382
0.56376	11.1203	7.7496
0.57047	11.2846	8.0959
0.57718	11.3951	8.7951
0.58389	11.2667	9.8228
0.5906	10.9187	9.9919
0.59732	10.4813	10.0211
0.60403	10.0228	9.8537
0.61074	9.6797	9.6179
0.61745	9.535	9.6976
0.62416	9.5772	10.1073
0.63087	9.6732	10.413
0.63758	9.8813	10.6309
0.6443	10.1577	10.8715
0.65101	10.1789	11.1789
0.65772	9.9203	11.6829
0.66443	9.6211	12.4033
0.67114	9.3333	13.2065
0.67785	9.1707	13.9463
0.68456	9.1919	14.252
0.69128	9.0309	14.065
0.69799	8.5967	13.6911
0.7047	8.039	13.2976
0.71141	7.5496	12.935
0.71812	7.1984	12.5772
0.72483	7.0813	12.2325
0.73154	6.9886	11.8179
0.73826	6.8211	11.3642
0.74497	6.7106	11.0211
0.75168	6.6959	10.8016
0.75839	6.5724	10.6943
0.7651	6.1089	10.6715
0.77181	5.7626	10.5659
0.77852	5.6797	10.374
0.78523	5.7008	10.174
0.79195	5.6407	9.9171
0.79866	5.4553	9.4764
0.80537	5.2276	9
0.81208	5.0033	8.6472
0.81879	4.8309	8.4504
0.8255	4.7561	8.3967
0.83221	4.7415	8.3577
0.83893	4.7642	8.2423
0.84564	4.7528	7.8976
0.85235	4.7512	7.5285
0.85906	4.6553	7.3902
0.86577	4.5837	7.4293
0.87248	4.6423	7.4374
0.87919	4.7431	7.3333
0.88591	4.5626	7.1463
0.89262	4.426	6.8894
0.89933	4.7333	6.6748
0.90604	5.0683	6.5398
0.91275	4.9496	6.4569
0.91946	4.5659	6.413
0.92617	4.1545	6.348
0.93289	3.7691	6.2894
0.9396	3.3512	6.1967
0.94631	3.0407	6.1236
0.95302	2.8813	6.1057
0.95973	2.9545	6.0163
0.96644	3.135	5.9415
0.97315	3.2862	5.9301
0.97987	3.1756	6.0049
0.98658	2.8976	6.0959
0.99329	2.535	6.1398
1	2.1967	6.1333
1.00671	2.0878	5.9463
1.01342	2.1626	5.7902
1.02013	2.1772	5.748
1.02685	2.078	5.6878
1.03356	2.1024	5.626
1.04027	2.2211	5.5382
1.04698	2.3008	5.4358
1.05369	2.3659	5.3707
1.0604	2.3837	5.3187
1.06711	2.4472	5.2374
1.07383	2.4439	5.1496
1.08054	2.5268	5.0423
1.08725	2.7837	5.0553
1.09396	3.2049	5.026
1.10067	3.3285	4.9935
1.10738	2.9041	4.9203
1.11409	2.6667	4.9024
1.12081	2.7333	4.8715
1.12752	2.7333	4.9902
1.13423	2.8016	5.2439
1.14094	2.8325	5.5252
1.14765	3.013	5.7463
1.15436	3.1642	5.9106
1.16107	3.4358	5.8081
1.16779	3.5675	5.7106
1.1745	3.5024	5.6829
1.18121	3.7512	5.8488
1.18792	4.3496	5.9772
1.19463	4.8976	6.0195
1.20134	5.013	6.0374
1.20805	5.1154	6.0293
1.21477	5.2537	6.1789
1.22148	5.3789	6.4065
1.22819	5.4439	6.8894
1.2349	5.5707	7.5285
1.24161	5.8309	8.052
1.24832	6.0943	8.4228
1.25503	6.187	8.6488
1.26174	6.3333	8.6667
1.26846	6.4341	8.6715
1.27517	6.5577	8.8309
1.28188	6.7041	9.1951
1.28859	7.0293	9.5805
1.2953	7.7317	10.0602
1.30201	8.4293	10.5008
1.30872	8.7024	10.8488
1.31544	8.8959	11.1642
1.32215	9.4504	11.5008
1.32886	10.4016	11.6715
1.33557	11.961	11.7707
1.34228	13.4699	11.9951
1.34899	14.122	12.6163
1.3557	14.278	13.4244
1.36242	14.5171	14.0992
1.36913	14.6358	14.722
1.37584	14.1951	15.2407
1.38255	13.5951	15.7106
1.38926	13.6683	16.2764
1.39597	14.1935	16.9138
1.40268	14.5545	17.2618
1.4094	14.652	17.2488
1.41611	14.5463	17.335
1.42282	14.278	17.6943
1.42953	14.2033	18.348
1.43624	14.2553	19.3626
1.44295	14.0407	20.2667
1.44966	13.5724	20.5902
1.45638	13.0829	20.6244
1.46309	12.7252	20.7138
1.4698	12.6276	20.961
1.47651	12.6797	21.2732
1.48322	12.078	21.6228
1.48993	10.8667	21.9008
1.49664	10.0358	22.0114
1.50336	9.7675	22.0358
1.51007	9.4846	21.8911
1.51678	9.039	21.3528
1.52349	8.5317	20.2276
1.5302	8.0862	18.6748
1.53691	7.5886	16.9593
1.54362	7.0634	15.2455
1.55034	6.4927	13.6407
1.55705	5.8244	12.1951
1.56376	5.4537	11.0407
1.57047	5.548	10.1886
1.57718	5.3951	9.5154
1.58389	4.8813	8.9837
1.5906	4.5935	8.3902
1.59732	4.7691	7.7821
1.60403	4.7041	7.1447
1.61074	4.1528	6.4439
1.61745	3.7431	5.735
1.62416	3.8146	5.1122
1.63087	3.8829	4.7122
1.63758	3.626	4.5528
1.6443	3.2667	4.4065
1.65101	2.9285	4.1252
1.65772	2.6407	3.7675
1.66443	2.5252	3.4829
1.67114	2.3593	3.2358
1.67785	2.0959	3.0569
1.68456	1.9024	2.9268
1.69128	1.6813	2.8504
1.69799	1.6293	2.8179
1.7047	1.7203	2.8309
1.71141	2.0862	2.8829
1.71812	2.5366	2.7951
1.72483	2.8049	2.5528
1.73154	2.7236	2.2488
1.73826	2.4016	1.961
1.74497	2.2114	1.6894
1.75168	2.1593	1.439
1.75839	2.2146	1.2407
1.7651	2.4146	1.1577
1.77181	2.9366	1.0715
1.77852	3.6683	1.0146
1.78523	4.2309	0.974
1.79195	4.6	0.8992
1.79866	5.039	0.8081
1.80537	5.5805	0.7333
1.81208	6.3008	0.6699
1.81879	7.1935	0.6146
1.8255	7.935	0.5691
1.83221	8.4341	0.5138
1.83893	8.6862	0.4618
1.84564	8.6602	0.4016
1.85235	8.2504	0.3447
1.85906	7.6894	0.2862
1.86577	7.4065	0.2309
1.87248	7.4797	0.1789
1.87919	7.2878	0.1285
1.88591	6.8081	0.0764
1.89262	6.3642	0.0455
1.89933	5.9886	0.0374
1.90604	5.7935	0.0309
1.91275	5.8439	0.0439
1.91946	5.8016	0.0407
1.92617	5.6309	0.0358
1.93289	5.5122	0.0423
1.9396	5.7886	0.0374
1.94631	6.5789	0.0455
1.95302	7.6959	0.0618
1.95973	8.7561	0.0846
1.96644	9.4049	0.0911
1.97315	9.7935	0.1122
1.97987	10.2878	0.1236
1.98658	10.8423	0.1463
1.99329	11.3854	0.1951
2	11.4358	0.2341
2.00671	10.9789	0.2374
2.01342	10.3382	0.2585
