# Supplementary material for: Myosin light chain 3 serves as a receptor for nervous necrosis virus entry into host cells via the macropinocytosis pathway
Source: eLife journal article supplement (doi:10.7554/elife.104772), 2024-12-17
Supplement: fig2-data4 [file elife-104772-fig2-data4-v1.zip]

## Sheet: Sheet1
Original data of Figure 2F-Mock-HEK293T
	.fcs		5000
>	.fcs/B525-FITC-A+	90.1	4505
>	.fcs/B525-FITC-A-	9.9	495
>	.fcs/B610-ECD-A+	87.1	4354
>	.fcs/B610-ECD-A-	12.9	646
>	.fcs/B690-PC5.5-A+	84.7	4236
>	.fcs/B690-PC5.5-A-	15.3	764
>	.fcs/NUV450-A+	45.5	2274
>	.fcs/NUV450-A-	54.5	2726
>	.fcs/NUV525-A+	39.3	1963
>	.fcs/NUV525-A-	60.7	3037
>	.fcs/NUV675-A+	94.5	4727
>	.fcs/NUV675-A-	5.46	273
>	.fcs/R660-APC-A+	85.6	4279
>	.fcs/R660-APC-A-	14.4	721
>	.fcs/R712-APCA700-A+	91.8	4589
>	.fcs/R712-APCA700-A-	8.22	411
>	.fcs/R763-APCA750-A+	95	4752
>	.fcs/R763-APCA750-A-	4.96	248
>	.fcs/V450-PB-A+	26.8	1342
>	.fcs/V450-PB-A-	73.2	3658
>	.fcs/Y610-mCHERRY-A+	93.1	4656
>	.fcs/Y610-mCHERRY-A-	6.88	344
>	.fcs/Y675-PC5-A+	91.6	4581
>	.fcs/Y675-PC5-A-	8.38	419
>	.fcs/Y710-PC5.5-A+	85.1	4256
>	.fcs/Y710-PC5.5-A-	14.9	744
>	.fcs/Y763-PC7-A+	42.9	2146
>	.fcs/Y763-PC7-A-	57.1	2854

## Sheet: Sheet2
Original data of Figure 2F-MmMYL3-Myc-HEK293T
	2.fcs		10000
>	2.fcs/B525-FITC-A+	89.9	8993
>	2.fcs/B525-FITC-A-	10.1	1007
>	2.fcs/B610-ECD-A+	87.4	8737
>	2.fcs/B610-ECD-A-	12.6	1263
>	2.fcs/B690-PC5.5-A+	83.3	8329
>	2.fcs/B690-PC5.5-A-	16.7	1671
>	2.fcs/NUV450-A+	96.3	9629
>	2.fcs/NUV450-A-	3.71	371
>	2.fcs/NUV525-A+	90.2	9018
>	2.fcs/NUV525-A-	9.82	982
>	2.fcs/NUV675-A+	85.8	8584
>	2.fcs/NUV675-A-	14.2	1416
>	2.fcs/R660-APC-A+	19.5	1948
>	2.fcs/R660-APC-A-	80.5	8052
>	2.fcs/R712-APCA700-A+	15.6	1563
>	2.fcs/R712-APCA700-A-	84.4	8437
>	2.fcs/R763-APCA750-A+	17.5	1749
>	2.fcs/R763-APCA750-A-	82.5	8251
>	2.fcs/V450-PB-A+	90.8	9078
>	2.fcs/V450-PB-A-	9.22	922
>	2.fcs/V525-KrO-A+	89.1	8906
>	2.fcs/V525-KrO-A-	10.9	1094
>	2.fcs/V610-A+	90.7	9066
>	2.fcs/V610-A-	9.34	934
>	2.fcs/VSSC-A+	6.83	683
>	2.fcs/VSSC-A-	93.2	9317
>	2.fcs/Y610-mCHERRY-A+	83.5	8352
>	2.fcs/Y610-mCHERRY-A-	16.5	1648
>	2.fcs/Y675-PC5-A+	85.8	8577
>	2.fcs/Y675-PC5-A-	14.2	1423
>	2.fcs/Y710-PC5.5-A+	15.9	1592
>	2.fcs/Y710-PC5.5-A-	84.1	8408
>	2.fcs/Y763-PC7-A+	90.1	9009
>	2.fcs/Y763-PC7-A-	9.91	991

## Sheet: Sheet3
Original data of Figure 2F-MmMYL3-Myc-HEK293T
	3.fcs		10000
>	3.fcs/B525-FITC-A+	92.5	9245
>	3.fcs/B525-FITC-A-	7.55	755
>	3.fcs/B610-ECD-A+	94.6	9461
>	3.fcs/B610-ECD-A-	5.39	539
>	3.fcs/B690-PC5.5-A+	89.8	8975
>	3.fcs/B690-PC5.5-A-	10.2	1025
>	3.fcs/NUV450-A+	91.7	9173
>	3.fcs/NUV450-A-	8.27	827
>	3.fcs/NUV525-A+	92.8	9280
>	3.fcs/NUV525-A-	7.2	720
>	3.fcs/NUV675-A+	93.4	9340
>	3.fcs/NUV675-A-	6.6	660
>	3.fcs/R660-APC-A+	21.5	2148
>	3.fcs/R660-APC-A-	78.5	7852
>	3.fcs/R712-APCA700-A+	21.7	2172
>	3.fcs/R712-APCA700-A-	78.3	7828
>	3.fcs/R763-APCA750-A+	19.6	1956
>	3.fcs/R763-APCA750-A-	80.4	8044
>	3.fcs/V450-PB-A+	92.2	9216
>	3.fcs/V450-PB-A-	7.84	784
>	3.fcs/Y610-mCHERRY-A+	20.2	2023
>	3.fcs/Y610-mCHERRY-A-	79.8	7977
>	3.fcs/Y675-PC5-A+	89.5	8951
>	3.fcs/Y675-PC5-A-	10.5	1049

## Sheet: Sheet4
Original data of Figure 2F-Mock-hMMES1
	-fish.fcs		10000
>	-fish.fcs/B525-FITC-A+	88.1	8810
>	-fish.fcs/B525-FITC-A-	11.9	1190
>	-fish.fcs/B610-ECD-A+	88	8803
>	-fish.fcs/B610-ECD-A-	12	1197
>	-fish.fcs/B690-PC5.5-A+	81.8	8180
>	-fish.fcs/B690-PC5.5-A-	18.2	1820
>	-fish.fcs/NUV450-A+	92.1	9214
>	-fish.fcs/NUV450-A-	7.86	786
>	-fish.fcs/NUV525-A+	94.7	9466
>	-fish.fcs/NUV525-A-	5.34	534
>	-fish.fcs/NUV675-A+	83.1	8314
>	-fish.fcs/NUV675-A-	16.9	1686
>	-fish.fcs/R660-APC-A+	74.7	7474
>	-fish.fcs/R660-APC-A-	25.3	2526
>	-fish.fcs/R712-APCA700-A+	75.9	7586
>	-fish.fcs/R712-APCA700-A-	24.1	2414
>	-fish.fcs/R763-APCA750-A+	76.4	7643
>	-fish.fcs/R763-APCA750-A-	23.6	2357
>	-fish.fcs/V450-PB-A+	78	7800
>	-fish.fcs/V450-PB-A-	22	2200
>	-fish.fcs/V525-KrO-A+	93.8	9380
>	-fish.fcs/V525-KrO-A-	6.2	620
>	-fish.fcs/V610-A+	87.1	8705
>	-fish.fcs/V610-A-	13	1295
>	-fish.fcs/VSSC-A+	78.5	7852
>	-fish.fcs/VSSC-A-	21.5	2148
>	-fish.fcs/Y585-PE-A+	67.1	6711
>	-fish.fcs/Y585-PE-A-	32.9	3289
>	-fish.fcs/Y610-mCHERRY-A+	73.8	7375
>	-fish.fcs/Y610-mCHERRY-A-	26.2	2625
>	-fish.fcs/Y675-PC5-A+	74.2	7421
>	-fish.fcs/Y675-PC5-A-	25.8	2579
>	-fish.fcs/Y710-PC5.5-A+	73.2	7316
>	-fish.fcs/Y710-PC5.5-A-	26.8	2684
>	-fish.fcs/Y763-PC7-A+	73.9	7394
>	-fish.fcs/Y763-PC7-A-	26.1	2606

## Sheet: Sheet5
Original data of Figure 2F-MmMYL3-Myc-hMMES1
	1-fish.fcs		10000
>	1-fish.fcs/B525-FITC-A+	86.7	8670
>	1-fish.fcs/B525-FITC-A-	13.3	1330
>	1-fish.fcs/B610-ECD-A+	82.9	8290
>	1-fish.fcs/B610-ECD-A-	17.1	1710
>	1-fish.fcs/B690-PC5.5-A+	72	7202
>	1-fish.fcs/B690-PC5.5-A-	28	2798
>	1-fish.fcs/NUV450-A+	83.2	8319
>	1-fish.fcs/NUV450-A-	16.8	1681
>	1-fish.fcs/NUV525-A+	79.3	7931
>	1-fish.fcs/NUV525-A-	20.7	2069
>	1-fish.fcs/NUV675-A+	76.5	7646
>	1-fish.fcs/NUV675-A-	23.5	2354
>	1-fish.fcs/R660-APC-A+	68	6802
>	1-fish.fcs/R660-APC-A-	32	3198
>	1-fish.fcs/R712-APCA700-A+	68.2	6822
>	1-fish.fcs/R712-APCA700-A-	31.8	3178
>	1-fish.fcs/R763-APCA750-A+	68.1	6812
>	1-fish.fcs/R763-APCA750-A-	31.9	3188
>	1-fish.fcs/V450-PB-A+	71.6	7161
>	1-fish.fcs/V450-PB-A-	28.4	2839
>	1-fish.fcs/V525-KrO-A+	90.1	9012
>	1-fish.fcs/V525-KrO-A-	9.88	988
>	1-fish.fcs/V610-A+	76.7	7672
>	1-fish.fcs/V610-A-	23.3	2328
>	1-fish.fcs/V660-A+	57.6	5759
>	1-fish.fcs/V660-A-	42.4	4241
>	1-fish.fcs/VSSC-A+	67.9	6793
>	1-fish.fcs/VSSC-A-	32.1	3207
>	1-fish.fcs/Y585-PE-A+	60.4	6040
>	1-fish.fcs/Y585-PE-A-	39.6	3960
>	1-fish.fcs/Y610-mCHERRY-A+	64.8	6481
>	1-fish.fcs/Y610-mCHERRY-A-	35.2	3519
>	1-fish.fcs/Y675-PC5-A+	63.7	6374
>	1-fish.fcs/Y675-PC5-A-	36.3	3626
>	1-fish.fcs/Y710-PC5.5-A+	65.5	6552
>	1-fish.fcs/Y710-PC5.5-A-	34.5	3448
>	1-fish.fcs/Y763-PC7-A+	66.9	6693
>	1-fish.fcs/Y763-PC7-A-	33.1	3307

## Sheet: Sheet6
Original data of Figure 2F-MmMYL3-Myc-hMMES1
	2-fish.fcs		10000
>	2-fish.fcs/B525-FITC-A+	84	8395
>	2-fish.fcs/B525-FITC-A-	16.1	1605
>	2-fish.fcs/B610-ECD-A+	84	8397
>	2-fish.fcs/B610-ECD-A-	16	1603
>	2-fish.fcs/B690-PC5.5-A+	51.2	5117
>	2-fish.fcs/B690-PC5.5-A-	48.8	4883
>	2-fish.fcs/NUV450-A+	95.8	9580
>	2-fish.fcs/NUV450-A-	4.2	420
>	2-fish.fcs/NUV525-A+	92	9196
>	2-fish.fcs/NUV525-A-	8.04	804
>	2-fish.fcs/NUV675-A+	78.6	7859
>	2-fish.fcs/NUV675-A-	21.4	2141
>	2-fish.fcs/R660-APC-A+	50.4	5044
>	2-fish.fcs/R660-APC-A-	49.6	4956
>	2-fish.fcs/R712-APCA700-A+	49.9	4989
>	2-fish.fcs/R712-APCA700-A-	50.1	5011
>	2-fish.fcs/R763-APCA750-A+	51.5	5154
>	2-fish.fcs/R763-APCA750-A-	48.5	4846
>	2-fish.fcs/V450-PB-A+	76.3	7635
>	2-fish.fcs/V450-PB-A-	23.6	2365
>	2-fish.fcs/V525-KrO-A+	82	8201
>	2-fish.fcs/V525-KrO-A-	18	1799
>	2-fish.fcs/V610-A+	89.4	8938
>	2-fish.fcs/V610-A-	10.6	1062
>	2-fish.fcs/VSSC-A+	51.3	5129
>	2-fish.fcs/VSSC-A-	48.7	4871
>	2-fish.fcs/Y585-PE-A+	42.8	4283
>	2-fish.fcs/Y585-PE-A-	57.2	5717
>	2-fish.fcs/Y610-mCHERRY-A+	46.2	4618
>	2-fish.fcs/Y610-mCHERRY-A-	53.8	5382
>	2-fish.fcs/Y675-PC5-A+	48.6	4857
>	2-fish.fcs/Y675-PC5-A-	51.4	5143
>	2-fish.fcs/Y710-PC5.5-A+	42.8	4283
>	2-fish.fcs/Y710-PC5.5-A-	57.2	5717
>	2-fish.fcs/Y763-PC7-A+	50.8	5076
>	2-fish.fcs/Y763-PC7-A-	49.2	4924
>	1-fish.fcs/Y763-PC7-A+	66.9	6693
>	1-fish.fcs/Y763-PC7-A-	33.1	3307
