# Supplementary material for: Myosin light chain 3 serves as a receptor for nervous necrosis virus entry into host cells via the macropinocytosis pathway
Source: eLife journal article supplement (doi:10.7554/elife.104772), 2024-12-17
Supplement: fig2-data5 [file elife-104772-fig2-data5-v1.zip]

## Sheet: Sheet1
Original data of Figure 2G-HEK293T permeabilized
Distance (pixels)	Gray value (MmMYL3)	Gray value (ATPA1)
0	22.7327	22.544
0.010417	22.3648	22.044
0.020833	22.5975	22.2642
0.03125	23.2893	22.8962
0.041667	24.2704	23.8616
0.052083	25.5912	25.1321
0.0625	26.9434	26.5692
0.072917	27.8113	27.4434
0.083333	27.7421	27.327
0.09375	27.0472	26.7233
0.104167	26.3082	25.8648
0.114583	24.4245	23.8994
0.125	22.4591	21.8302
0.135417	20.9277	20.2201
0.145833	19.9434	19.1321
0.15625	20.3396	19.0094
0.166667	23.1792	21.0755
0.177083	28.1604	25.6101
0.1875	30.9528	28.805
0.197917	32.6478	28.9434
0.208333	36.0723	29.1981
0.21875	39.5692	30.0189
0.229167	42.4403	31.0692
0.239583	44.8396	34.4969
0.25	47.9277	38.3333
0.260417	50.195	39.4969
0.270833	51.1006	39.8019
0.28125	51.8522	39.7233
0.291667	51.978	40.6509
0.302083	51.3868	40.9245
0.3125	51.0786	41.2642
0.322917	50.6761	41.2516
0.333333	50.4371	40.7893
0.34375	50.3774	40.3145
0.354167	48.1635	39.6132
0.364583	45.6226	39.2642
0.375	44.6321	40.0723
0.385417	44.5063	40.5535
0.395833	43.5943	39.7013
0.40625	42.1478	38.6761
0.416667	41.1855	37.3491
0.427083	40.1855	35.9434
0.4375	38.3145	32.9182
0.447917	36.8019	29.8019
0.458333	36.1006	28.2516
0.46875	35.7673	29.1006
0.479167	35.5314	30.8113
0.489583	34.7642	30.4371
0.5	33.066	29.456
0.510417	32.195	28.7925
0.520833	32.3522	29.261
0.53125	33.2327	29.9717
0.541667	33.478	29.5629
0.552083	33.8082	29.2862
0.5625	35.2767	30.7893
0.572917	37.8585	33.7956
0.583333	40.3396	35.695
0.59375	41.978	36.4119
0.604167	41.8522	35.7736
0.614583	41.217	36.0283
0.625	41.1069	36.7107
0.635417	41.1321	36.8899
0.645833	40.3805	36.4434
0.65625	39.0535	34.4969
0.666667	38.4686	33.0692
0.677083	38.7107	33.1006
0.6875	39.4591	33.6101
0.697917	40.3931	35.327
0.708333	41.0031	37.3176
0.71875	40.8774	37.8333
0.729167	40.1761	37.3931
0.739583	39.478	36.283
0.75	38.3396	35.0566
0.760417	37.7925	34.6195
0.770833	37.7767	35.673
0.78125	36.6258	34.1541
0.791667	36.0535	33.7673
0.802083	36.022	34.6101
0.8125	35.2138	34.1447
0.822917	34.4182	34.0849
0.833333	34.3145	33.6541
0.84375	34.1792	31.9182
0.854167	34.3365	32.239
0.864583	34.5472	31.5503
0.875	34.8742	30.3836
0.885417	34.4811	31.1069
0.895833	33.4969	30.4025
0.90625	33.0629	29.761
0.916667	32.6006	29.5723

## Sheet: Sheet2
Original data of Figure 2G-HEK293T non permeabilized
Distance (pixels)	Gray value (MmMYL3)	Gray value (ATPA1)
0	27.2958	24.4042
0.01042	27.0417	24.0958
0.02083	26.8875	23.5917
0.03125	26.5917	22.9042
0.04167	25.4417	21.4667
0.05208	23.4083	19.45
0.0625	20.925	16.8208
0.07292	18.9583	14.9083
0.08333	17.8917	13.575
0.09375	17.7375	13.1667
0.10417	18.2833	13.5125
0.11458	20.0583	16.0917
0.125	22.05	19.4583
0.13542	22.1375	19.95
0.14583	20.5542	16.875
0.15625	21.5	16.7083
0.16667	23.8625	18.975
0.17708	25.3583	20.7292
0.1875	26.7292	21.4375
0.19792	28.7083	22.3208
0.20833	31.0042	23.5292
0.21875	33.6417	24.8583
0.22917	36.7042	27.975
0.23958	39.3833	32.2792
0.25	38.9083	33.4625
0.26042	38.0625	33.125
0.27083	37.9	34.3208
0.28125	38.8958	35.8
0.29167	39.8042	36.175
0.30208	40.275	36.6042
0.3125	40.3625	35.1667
0.32292	40.0667	34.1625
0.33333	39.6042	34.6542
0.34375	39.0208	33.8583
0.35417	38.3583	32.225
0.36458	39.1792	32.2125
0.375	39.0333	32.5375
0.38542	37.85	32.9958
0.39583	36.3167	32.8792
0.40625	34.6875	32.3792
0.41667	33.8167	32.7792
0.42708	31.5125	29.3042
0.4375	28.5292	22.475
0.44792	27.6583	21.0542
0.45833	27.6125	21.2792
0.46875	29.2083	23.1125
0.47917	33.0875	26.3708
0.48958	37.6667	29.975
0.5	41.3875	31.3375
0.51042	42.925	31.4667
0.52083	43.8417	30.8542
0.53125	45.55	29.025
0.54167	45.4292	27.9458
0.55208	44.6333	27.5333
0.5625	44.9625	26.7542
0.57292	44.0792	25.8333
0.58333	41.8958	25.1083
0.59375	41.7542	25.3792
0.60417	42.3833	25.7542
0.61458	42.6708	26.9708
0.625	43.9583	28.1667
0.63542	44.1833	28.3375
0.64583	42.7667	27.0542
0.65625	42.1042	25.6375
0.66667	41.1125	24.3417
0.67708	39.7333	23.4125
0.6875	39.4	23.6083
0.69792	39.9833	23.725
0.70833	37.7208	21.05
0.71875	33.125	17.975
0.72917	30.1417	16.8
0.73958	29.6083	16.9583
0.75	29.9583	17.2
0.76042	30.5208	18.7958
0.77083	30.8333	20.6667
0.78125	31.5208	21.1583
0.79167	32.0083	22.4208
0.80208	33.1	24.6125
0.8125	33.6125	26.2958
0.82292	34.2125	27.6125
0.83333	35.0208	28.25
0.84375	35.6083	28.5667
0.85417	35.7292	28.7333
0.86458	35.775	28.4208
0.875	34.7208	27.6125
0.88542	33.7417	27.0875
0.89583	33.2625	27.0708
0.90625	32.1667	26.8917
0.91667	30.8875	26.4125
0.92708	30.1333	26.3
0.9375	30.4083	26.675
0.94792	30.4167	27.0208
0.95833	30.5792	27.1208
0.96875	31.2542	27.5625
0.97917	32.4208	28.4583
0.98958	33.0333	28.8208
1	32.8583	29.0875
1.01042	32.3792	28.7417
