# Supplementary material for: Myosin light chain 3 serves as a receptor for nervous necrosis virus entry into host cells via the macropinocytosis pathway
Source: eLife journal article supplement (doi:10.7554/elife.104772), 2024-12-17
Supplement: fig2-data6 [file elife-104772-fig2-data6-v1.zip]

## Sheet: Sheet1
Original data of Figure 2H-hMMES1 permeabilized
Distance (pixels)	Gray value (MmMYL3)	Gray value (ATPA1)
0	9.9463	19.0889
1	9.1648	18.4852
2	8.2296	16.9056
3	7.5037	15.1056
4	7.2333	13.263
5	7.3648	11.7537
6	7.7204	11.4148
7	8.0019	12.4278
8	8.5519	13.8
9	9.6056	15.6537
10	10.5481	17.9722
11	11.4315	19.8463
12	11.8741	21.4278
13	12.5778	22.3963
14	14.2648	23.8722
15	16.85	26.0537
16	19.1278	27.8537
17	20.813	28.5611
18	23.6667	28.4407
19	25.7204	30.2389
20	27.7352	31.7704
21	29.6444	34.4444
22	30.987	36.7
23	31.5	37.7185
24	31.6056	38.1741
25	31.9537	38.7426
26	31.1537	40.0074
27	27.9815	39.8037
28	26.35	38.3056
29	25.2389	37.7037
30	24.2537	36.8981
31	22.8611	35.7667
32	19.9463	34.4148
33	17.337	31.5519
34	15.45	28.5093
35	14.0963	26.2574
36	13.4148	25.2481
37	13.0815	24.9259
38	14.0111	25.3722
39	15.4778	27.5648
40	16.3056	28.7278
41	16.5315	29.087
42	17.2333	29.9648
43	18.0981	30.8426
44	18.9815	31.8685
45	19.5389	31.55
46	19.637	31.3222
47	19.8148	31.2074
48	20.6741	32.5926
49	22.35	34.1519
50	23.5685	35.5481
51	24.0093	35.4
52	23.6389	34.7648
53	22.7648	33.2296
54	21.6611	31.5019
55	20.05	30.3556
56	18.3278	27.7907
57	17.963	25.6889
58	18.6556	26.2019
59	19.0611	28.1074
60	18.9278	29.2481
61	18.9889	29.8296
62	20.2019	30.9926
63	22.0056	32.4556
64	23.3	34.2241
65	24.3889	35.6796
66	25.0833	36.6444
67	24.6222	36.2759
68	23.663	34.4037
69	22.063	31.7593
70	20.7926	30.2852
71	19.6278	29.6463
72	18.0852	27.8056
73	17.0056	25.2278
74	15.887	22.2315
75	15.4907	20.0815
76	15.6759	19.4
77	15.9352	19.063
78	16.4407	20.1963
79	17.1889	22.0759
80	18.6889	24.5796
81	20.3259	27.4759
82	21.1444	29.5019
83	20.9778	29.2963
84	21.6593	29.7852
85	23.0722	31.7907
86	23.4444	32.2519
87	22.3389	30.8
88	19.2704	28.0889
89	17.1556	26.8222
90	16.8926	27.013
91	17.0815	27.2648
92	17.137	26.8648
93	17.2426	26.7148
94	16.9926	27.2259
95	14.7722	24.8259
96	11.4537	19.1278
97	8.8296	16.0852
98	8.4463	16.4315
99	9.387	17.6426
100	10.0315	18.5093
101	10.737	19.4704
102	11.3778	19.7889
103	11.8648	19.7019
104	12.3426	19.7463
105	12.8074	19.7796
106	13.0481	19.6926
107	12.7074	18.8241
108	11.8574	17.1463
109	9.937	13.9852
110	7.8333	10.4537
111	6.5537	8.2259
112	6.6963	7.6204
113	7.3185	8.3
114	8.0889	9.6278
115	8.8926	11.1167
116	9.6037	12.1926
117	10.5074	12.9556
118	11.687	13.4167
119	13.987	14.1278
120	16.8815	16.1241
121	19.2204	18.4037
122	20.5463	19.9185
123	20.7556	20.5648
124	20.7444	21.9778
125	21.2241	23.8481
126	22.4148	26.6704
127	24.6815	28.787
128	24.6315	27.85
129	22.1167	24.9667
130	20.3519	22.8593
131	18.5741	20.1907
132	17.4148	19.4463
133	17.9389	20.4574
134	18.0259	20.5352
135	17.3815	20.4296
136	17.2426	20.9852
137	18.4556	23.1296
138	19.0963	24.8685
139	19.1519	26.1111
140	19.0741	27.2704
141	18.837	27.8667
142	18.6611	28.6778
143	18.713	28.7093
144	17.813	26.4407
145	15.7963	23.1593
146	13.337	20.4741
147	11.9241	20.6296
148	12.2963	21.9852
149	13.3981	23.987
150	14.9741	26.1574
151	16.2167	26.9241
152	16.5889	26.8463
153	16.4519	26.863
154	16.1648	26.1704
155	15.2481	24.8907
156	13.563	22.5315
157	11.4685	20.6148
158	10.6333	20.1833
159	10.3889	20.137
160	10.1148	20.3333
161	10.1611	20.5426
162	10.1481	20.8926
163	10.4111	21.9926
164	10.8722	23.2389
165	11.5648	24.5426
166	12.3648	25.8759
167	13.1796	26.013
168	13.1111	25.0056
169	12.4963	23.9481
170	11.9648	23.1222
171	11.5593	22.0759
172	11.0389	21.113
173	10.737	20.2963
174	10.4963	18.6685
175	9.5685	16.6333
176	8.5056	16.4741
177	8.387	17.7759
178	9.25	18.9241
179	9.8926	19.5796
180	10.0611	19.3444
181	9.7778	17.95
182	8.9667	16.4444
183	8.1167	15.75
184	7.7833	15.0019
185	7.3315	14.1519

## Sheet: Sheet2
Original data of Figure 2H-hMMES1 non permeabilized
Distance (pixels)	Gray value (MmMYL3)	Gray value (ATPA1)
0	25.0562	24.7751
0.010417	24.6225	24.3052
0.020833	23.506	23.1727
0.03125	22.4378	22.1526
0.041667	21.2249	20.996
0.052083	20.0321	19.8474
0.0625	19.1406	18.9197
0.072917	18.5301	18.3373
0.083333	18.5422	18.3655
0.09375	18.5301	18.3253
0.104167	18.5261	18.3253
0.114583	18.5502	18.3293
0.125	18.8273	18.4137
0.135417	19.5422	18.249
0.145833	21.9478	18.8755
0.15625	24.3173	20.3373
0.166667	26.0442	21.8594
0.177083	28.747	24.0843
0.1875	31.9478	26.2169
0.197917	33.8032	26.9518
0.208333	35.6827	26.8996
0.21875	36.5141	26.4458
0.229167	37.3815	25.747
0.239583	38.3735	24.7269
0.25	39.5462	24.3976
0.260417	40.6426	24.5582
0.270833	41.3333	24.6586
0.28125	42.0562	25.1566
0.291667	42.8394	26.5141
0.302083	42.494	27.6426
0.3125	41.0924	28
0.322917	40.0281	28.6145
0.333333	38.7229	28.6586
0.34375	37.4779	28.3574
0.354167	36.7108	28.4137
0.364583	36.5663	30.0482
0.375	37.1124	32.5904
0.385417	38.5341	33.3373
0.395833	40.2771	33.7149
0.40625	39.7108	31.6145
0.416667	39.1004	30.8313
0.427083	39.1486	30.4257
0.4375	38.8594	29.5261
0.447917	38.6988	29.2209
0.458333	38.3213	29.2731
0.46875	38.1647	28.3655
0.479167	39.9438	29.0843
0.489583	41.4297	30.5502
0.5	42.739	31.5422
0.510417	44.0321	31.1165
0.520833	44.2651	30.7711
0.53125	41.0442	28.9719
0.541667	35.8112	26.1727
0.552083	32.3052	23.7028
0.5625	29.1285	21.3253
0.572917	27.2369	19.7229
0.583333	26.1205	19.9116
0.59375	25.9398	21.4177
0.604167	26.2169	22.7912
0.614583	26.8554	24.0602
0.625	29.0602	26.494
0.635417	30.5462	27.7952
0.645833	31.5181	28.5542
0.65625	33.6185	30.6466
0.666667	35.4337	32.1406
0.677083	36.9799	33.1647
0.6875	38.6787	34.6345
0.697917	40.7871	36.8956
0.708333	41.743	37.8916
0.71875	41.6787	37.988
0.729167	41.4418	37.2771
0.739583	41.4819	37.2249
0.75	42.5743	37.9799
0.760417	43.4056	39.7309
0.770833	42.6867	39.8554
0.78125	41.3012	38.1767
0.791667	39.3534	38.0602
0.802083	35.5743	38.3896
0.8125	29.8153	32.1044
0.822917	28.8594	28.8434
0.833333	29.8353	29.8313
0.84375	30.3213	30.2972
0.854167	30.6707	30.6867
0.864583	30.6667	30.8795
0.875	30.1084	30.3936
0.885417	28.4337	28.6827
0.895833	26.2932	26.5743
0.90625	23.9759	24.241
0.916667	21.506	21.8353
0.927083	19.739	19.9759
