# Supplementary material for: Myosin light chain 3 serves as a receptor for nervous necrosis virus entry into host cells via the macropinocytosis pathway
Source: eLife journal article supplement (doi:10.7554/elife.104772), 2024-12-17
Supplement: fig3-data1 [file elife-104772-fig3-data1-v1.zip]

## Sheet: Sheet1
Oringinal data of Figure 3A
Myc		Myc-MmMyo3b
1	0.0166143	2000.31	3.19664
4.97341	0.0321378	3100.33	10.6036
Oringinal data of Figure 3B
Myc		Myc-MmMyo3b
1	0.0166143	2.8	0.2
5.221	0.321378	17.523	0.123
Oringinal data of Figure 3C
Myc		Myc-MmMYL3
1	0.0166143	3.63774	0.01
1.12142	0.0321378	5.43647	0.0123
Oringinal data of Figure 3D
NC		siRNA
1	0.0166143	0.13774	0.01
1.221	0.0321378	0.13647	0.0123
Oringinal data of Figure 3E
NC		siRNA
1	0.0166143	0.493116	0.02
3.221	0.021378	0.242043	0.0123
Oringinal data of Figure 3F
NC		siRNA
1	0.0166143	0.63774	0.01
1.221	0.0321378	0.43647	0.0123
Oringinal data of Figure 3G
C	1	0.123
1	0.5231	0.11
2	0.3841	0.023
Oringinal data of Figure 3H
C	1	0.123
1	0.8231	0.11
2	0.4141	0.13
Oringinal data of Figure 3I
MOCK		Anti-MYL3
1	0.166143	0.23774	0.01
0.52221	0.121378	0.23647	0.0123
Oringinal data of Figure 3J
MOCK		Anti-MYL3
1	0.166143	0.73774	0.12
0.72221	0.121378	0.33647	0.0123
Oringinal data of Figure 3K
C	0.999998	0.210368
5μM	0.565613	0.0591951
10μM	0.494796	0.0787655
20μM	0.40684	0.0191913
40μM	0.265382	0.0308643
Oringinal data of Figure 3L
C	0.999998	0.00843525
5μM	0.901224	0.107195
10μM	0.627782	0.170416
20μM	0.542737	0.155127
40μM	0.370963	0.0064472
