# Supplementary material for: Myosin light chain 3 serves as a receptor for nervous necrosis virus entry into host cells via the macropinocytosis pathway
Source: eLife journal article supplement (doi:10.7554/elife.104772), 2024-12-17
Supplement: fig3-figsupp1-data2 [file elife-104772-fig3-figsupp1-data2-v1.pdf]

Recombinant expression and purification of MmMYL3-GST

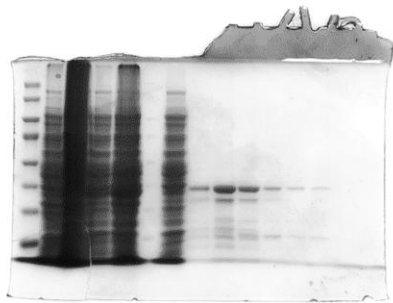

Recombinant expression and purification of GST

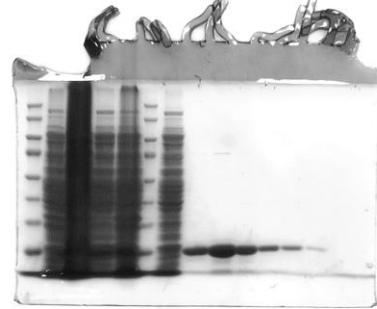

Figure 3-supplement 1, Source Data 1. Original gels corresponding to Figure 3 supplement 1B. Recombinant expression and purification of MmMYL3-GST (left) and GST (right). The sequence of the bands is as follows: marker; cell extracts before IPTG induction; cell extracts after IPTG induction; supernatant after centrifugation; precipitate after centrifugation; flow through; purified recombinant.
