# Supplementary material for: Myosin light chain 3 serves as a receptor for nervous necrosis virus entry into host cells via the macropinocytosis pathway
Source: eLife journal article supplement (doi:10.7554/elife.104772), 2024-12-17
Supplement: fig4-data2 [file elife-104772-fig4-data2-v1.pdf]

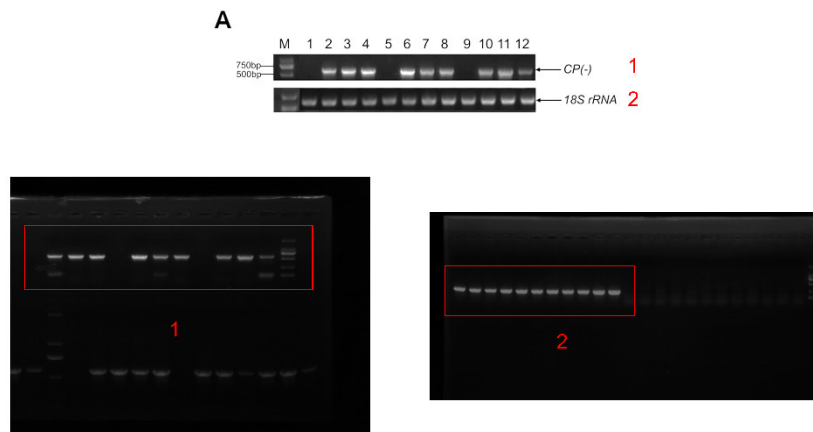

Figure 4, Source Data 1. Original gels corresponding to Figure 4A. The red box marked as 1 represents the CP (-) sequence. The red box marked as 2 represents 18S RNA sequence.
