# Supplementary material for: Myosin light chain 3 serves as a receptor for nervous necrosis virus entry into host cells via the macropinocytosis pathway
Source: eLife journal article supplement (doi:10.7554/elife.104772), 2024-12-17
Supplement: fig4-data3 [file elife-104772-fig4-data3-v1.zip]

## Sheet: Sheet1
Oringinal data of Figure 4B
C	1	0.123
MmHSP90ab1	3.841	0.23
MmMYL3	5.231	0.11
