# Supplementary material for: Myosin light chain 3 serves as a receptor for nervous necrosis virus entry into host cells via the macropinocytosis pathway
Source: eLife journal article supplement (doi:10.7554/elife.104772), 2024-12-17
Supplement: fig4-data4 [file elife-104772-fig4-data4-v1.zip]

## Sheet: Sheet1
Original data of Figure 4C
Distance (pixels)	Gray value (MmMYL3)	Gray value (CP)
0	0	2.125
1	0	2.1306
2	0	2.1306
3	0	2.1361
4	0	2.1778
5	0	2.2861
6	0	2.2806
7	0	2.2333
8	0	2.2583
9	0	2.3056
10	0	2.3972
11	0	2.4611
12	0	2.5778
13	0	2.8333
14	0.1806	3.4
15	0.4444	4.2111
16	0.9306	5.1889
17	1.4167	6.425
18	2.0222	8.2111
19	3.7472	11.0278
20	6.55	14.15
21	10.0528	17.3139
22	13.6139	20.1889
23	16.2861	22.8667
24	18.3694	25.3194
25	19.75	27.0972
26	20.1111	27.2222
27	20.2806	26.2278
28	19.9306	25.3667
29	20.2	24.8694
30	21.2778	25.4139
31	21.9278	26.1444
32	22.4306	26.5667
33	23.225	27.125
34	24.2972	27.5056
35	24.7944	27.4444
36	24.9667	27.5611
37	25.5417	28.2556
38	27.45	30.2333
39	29.4083	33.0472
40	30.6056	35.1028
41	31.6028	36.1694
42	31.9917	36.9583
43	32.5778	36.4861
44	32.175	35.6194
45	30.6278	34.65
46	30.1944	34.3278
47	31.2	34.5556
48	31.6111	35.0111
49	31.3472	34.7361
50	30.7056	34.2917
51	29.4639	33.7139
52	28.6139	33.0694
53	27.9667	32.6861
54	27.2306	32.1556
55	26.3083	31.7833
56	25.6083	31.525
57	25.0806	31.1806
58	24.4306	30.5806
59	23.25	29.5722
60	22.4056	28.7278
61	21.9361	28.075
62	22.0389	27.5722
63	22.95	27.325
64	23.8167	27.1861
65	24.3861	27.1861
66	25.3778	27.1972
67	26.6306	27.4917
68	26.5083	27.2806
69	25.1083	26.9333
70	22.6278	26.1611
71	21.0528	24.7722
72	21.0222	23.9278
73	21.4806	23.8222
74	21.4917	24.1111
75	21.3111	24.3472
76	21.1667	24.9833
77	21.6333	25.3139
78	22.2722	25.5611
79	22.9444	26.1056
80	21.9028	26.8556
81	19.85	26.7778
82	17.9583	25.9194
83	16.1417	25.0194
84	14.3306	23.7806
85	13.0333	22.0889
86	12.2056	20.3472
87	11.0528	19.1694
88	10	17.3417
89	8.8639	15.1139
90	6.2972	13.4611
91	3.5694	11.7389
92	1.5222	9.7
93	0.3194	7.4833
94	0.0806	5.3694
95	0	3.9667
96	0	3.3333
97	0	3.0639
98	0	3.0444
99	0	2.9028
100	0	2.85
101	0	2.7472
102	0	2.7111
103	0	2.7083
104	0	2.7
105	0	2.7111
106	0	2.7
107	0	2.6917
