# Supplementary material for: Myosin light chain 3 serves as a receptor for nervous necrosis virus entry into host cells via the macropinocytosis pathway
Source: eLife journal article supplement (doi:10.7554/elife.104772), 2024-12-17
Supplement: fig4-data5 [file elife-104772-fig4-data5-v1.zip]

## Sheet: Sheet1
Oringinal data of Figure 4F
Days	Negative Control	MmMYL3 group	GST group
1			1
1			1
1			1
2	0		1
2	0		1
2	0		1
2			1
2			1
2			1
2			1
3	0	1	1
3	0	1	1
3	0	1	1
3		1
4	0	1	1
4	0	1	1
4	0		1
5	0	1	1
5	0	1	1
5	0	1	1
5			1
5		1	1
5	0	0	1
5	0	0	1
5	0	0	1
5	0	0	1
5	0	0	1
5	0	0	1
5	0	0	1
7	0	0
8	0	0
9	0	0
10	0	0
