# Supplementary material for: Myosin light chain 3 serves as a receptor for nervous necrosis virus entry into host cells via the macropinocytosis pathway
Source: eLife journal article supplement (doi:10.7554/elife.104772), 2024-12-17
Supplement: fig4-data6 [file elife-104772-fig4-data6-v1.zip]

## Sheet: Sheet1
Oringinal data of Figure 4G
MmMYL3-NNV		GST-NNV
1	0.245902	6.3384	0.350652
1	0.17398	5.4539	0.372422
