# Supplementary material for: Myosin light chain 3 serves as a receptor for nervous necrosis virus entry into host cells via the macropinocytosis pathway
Source: eLife journal article supplement (doi:10.7554/elife.104772), 2024-12-17
Supplement: fig5-data1 [file elife-104772-fig5-data1-v1.zip]

## Sheet: Sheet1
Oringinal data of Figure 5A
DMSO	1	0.123
EIPA	0.2231	0.051
Rottlerin	0.3841	0.03
CPZ	0.563146	0.0829575
Nystatin	1.29579	0.0522601
