# Supplementary material for: Myosin light chain 3 serves as a receptor for nervous necrosis virus entry into host cells via the macropinocytosis pathway
Source: eLife journal article supplement (doi:10.7554/elife.104772), 2024-12-17
Supplement: fig5-data2 [file elife-104772-fig5-data2-v1.zip]

## Sheet: Sheet1
Oringinal data of Figure 5B
DMSO	1	0.166143	1	0.2111	1	0.16465	1	0.223111
10μM	0.373774	0.12	0.25123	0.09023	0.782639	0.0102599	1.43711	0.0330553
20μM	0.43647	0.0123	0.26254	0.084	0.982639	0.0102599	0.982565	0.0471975
