# Supplementary material for: Myosin light chain 3 serves as a receptor for nervous necrosis virus entry into host cells via the macropinocytosis pathway
Source: eLife journal article supplement (doi:10.7554/elife.104772), 2024-12-17
Supplement: fig5-data3 [file Figure 5-source data 3.xlsx]

## Sheet: Sheet1
Original data of Figure 5D
Distance (pixels)	Gray value (MmMYL3)	Gray value (CP)	Gray value (Dextran-647)
0	0.1338	3.0297	0.0669
0.01053	0.2102	3.034	0.1051
0.02105	0.2293	3.0425	0.11465
0.03158	0.2484	3.051	0.1242
0.04211	0.3248	3.0764	0.1624
0.05263	0.4013	3.0807	0.20065
0.06316	0.4076	3.0892	0.2038
0.07368	0.414	3.1359	0.207
0.08421	0.465	3.1699	0.2325
0.09474	0.5478	3.2144	0.2739
0.10526	0.6433	3.2718	0.32165
0.11579	0.6752	3.3588	0.3376
0.12632	0.7516	3.4161	0.3758
0.13684	0.8896	3.4395	0.4448
0.14737	0.8514	3.4607	0.4257
0.15789	0.9193	3.6242	0.45965
0.16842	1.1062	3.724	0.5531
0.17895	1.2803	3.8429	0.64015
0.18947	1.7028	3.9745	0.8514
0.2	2.1783	4.2824	1.08915
0.21053	2.8429	4.5817	1.42145
0.22105	3.4183	4.9321	1.70915
0.23158	4.1699	5.4522	2.08495
0.24211	5.4565	6.2144	2.72825
0.25263	7.5499	7.397	3.77495
0.26316	9.9342	9.1635	4.9671
0.27368	12.3079	11.397	6.15395
0.28421	12.7431	13.1635	6.37155
0.29474	12.7452	14.3631	6.3726
0.30526	13.6327	15.9151	6.81635
0.31579	14.5499	17.3907	7.27495
0.32632	15.4459	17.5817	7.72295
0.33684	16.0042	17.7134	8.0021
0.34737	16.7749	17.8896	8.38745
0.35789	17.6667	17.535	8.83335
0.36842	18.0127	17.3227	9.00635
0.37895	18.741	17.0064	9.3705
0.38947	20.1932	17.0467	10.0966
0.4	21.8896	17.5435	10.9448
0.41053	22.5796	17.7197	11.2898
0.42105	22.3355	17.7134	11.1677
0.43158	21.4076	17.8344	10.7038
0.44211	19.9915	17.7537	9.99575
0.45263	18.276	17.8471	9.138
0.46316	17.0955	17.8938	8.54775
0.47368	16.017	17.8471	8.0085
0.48421	14.8195	18.1295	7.40975
0.49474	13.7622	18.087	6.8811
0.50526	12.586	17.7558	6.293
0.51579	11.4501	17.3907	5.72505
0.52632	10.3206	16.8896	5.1603
0.53684	9.414	16.7176	4.707
0.54737	8.6412	16.6688	4.3206
0.55789	7.7686	16.6136	3.8843
0.56842	7.1953	16.2781	3.59765
0.57895	6.5499	15.741	3.27495
0.58947	6.4713	15.3949	3.23565
0.6	6.448	15.1295	3.224
0.61053	6.2272	14.7346	3.1136
0.62105	6.0913	14.5096	3.04565
0.63158	5.6518	14.465	2.8259
0.64211	5.4204	14.4544	2.7102
0.65263	5.3673	14.4161	2.68365
0.66316	5.2739	14.4246	2.63695
0.67368	5.259	14.4395	2.6295
0.68421	5.3609	14.4841	2.68045
0.69474	5.293	14.6093	2.6465
0.70526	5.2739	14.7622	2.63695
0.71579	5.3185	14.8493	2.65925
0.72632	5.1338	15.0955	2.5669
0.73684	5.2569	15.0573	2.62845
0.74737	5.6667	15.0658	2.83335
0.75789	6.0064	14.8344	3.0032
0.76842	6.6093	14.4735	3.30465
0.77895	7.4459	14.3482	3.72295
0.78947	7.8896	14.6943	3.9448
0.8	8.3864	15.0318	4.1932
0.81053	8.5117	15.2866	4.25585
0.82105	8.5541	15.2909	4.27705
0.83158	8.4756	15.1338	4.2378
0.84211	8.0594	14.3333	4.0297
0.85263	6.9512	12.31	3.4756
0.86316	4.6391	9.2059	2.31955
0.87368	2.2102	6.1444	1.1051
0.88421	1.1359	4.6645	0.56795
0.89474	0.9554	4.2166	0.4777
0.90526	0.8344	3.9958	0.4172
0.91579	0.8217	3.758	0.41085
0.92632	0.6412	3.6476	0.3206
0.93684	0.4904	3.5478	0.2452
0.94737	0.4692	3.4777	0.2346
0.95789	0.4204	3.3397	0.2102
0.96842	0.4268	3.3121	0.2134
0.97895	0.3291	3.2187	0.16455
0.98947	0.3907	3.1996	0.19535
1	0.3057	3.0998	0.15285
1.01053	0.31	3.087	0.155
1.02105	0.3185	3.0892	0.15925
1.03158	0.3822	3.0934	0.1911
1.04211	0.4374	3.0998	0.2187
1.05263	0.5159	3.1146	0.25795
1.06316	0.7261	3.3503	0.36305
1.07368	1.0722	3.6582	0.5361
1.08421	1.5053	4.0977	0.75265
1.09474	2.397	4.7558	1.1985
1.10526	4.4034	5.8917	2.2017
1.11579	7.2548	7.8981	3.6274
1.12632	9.5223	10.0828	4.76115
1.13684	10.8004	12.3822	5.4002
1.14737	10.5032	14	5.2516
1.15789	9.845	14.3673	4.9225
1.16842	9.8408	14.431	4.9204
1.17895	10.5372	14.9894	5.2686
1.18947	11.5754	16.1614	5.7877
1.2	12.3779	16.7261	6.18895
1.21053	12.5223	16.9958	6.26115
1.22105	11.983	17.2781	5.9915
1.23158	12.1868	17.7919	6.0934
1.24211	12.7495	18.1741	6.37475
1.25263	12.9766	17.9915	6.4883
1.26316	12.8747	18.0679	6.43735
1.27368	12.9639	18.2229	6.48195
1.28421	12.9703	18.1338	6.48515
1.29474	12.7601	17.8641	6.38005
1.30526	12.2951	17.5244	6.14755
1.31579	12.3333	17.3482	6.16665
1.32632	12.9342	17.2696	6.4671
1.33684	13.1847	17.2251	6.59235
1.34737	13.1253	17.3609	6.56265
1.35789	12.8344	17.4735	6.4172
1.36842	13.104	17.4119	6.552
1.37895	13.5393	17.4968	6.76965
1.38947	13.9193	17.62	6.95965
1.4	14.6454	17.3333	7.3227
1.41053	14.4501	16.5393	7.22505
1.42105	14.2187	16.0276	7.10935
1.43158	14.3631	15.8301	7.18155
1.44211	14.5711	15.8938	7.28555
1.45263	14.4416	16.0212	7.2208
1.46316	14.0849	15.9151	7.04245
1.47368	13.862	15.7176	6.931
1.48421	13.8089	15.7728	6.90445
1.49474	13.104	15.5414	6.552
1.50526	12.1146	15.0913	6.0573
1.51579	11.7091	14.4989	5.85455
1.52632	11.7728	14.2378	5.8864
1.53684	11.465	14.3227	5.7325
1.54737	11.1592	14.2972	5.5796
1.55789	11.3631	14.1316	5.68155
1.56842	11.3546	13.9851	5.6773
1.57895	10.9915	13.7473	5.49575
1.58947	11.2357	13.6921	5.61785
1.6	11.5605	13.7601	5.78025
1.61053	10.8726	13.4883	5.4363
1.62105	9.9703	12.6943	4.98515
1.63158	8.6837	11.586	4.34185
1.64211	7.0467	10.2866	3.52335
1.65263	5.2909	8.7622	2.64545
1.66316	4.2696	7.6667	2.1348
1.67368	3.8259	7.155	1.91295
1.68421	3.8938	6.8132	1.9469
1.69474	3.983	6.3588	1.9915
1.70526	3.9066	5.9236	1.9533
1.71579	2.7346	5.2718	1.3673
1.72632	1.9745	4.6709	0.98725
1.73684	1.7792	4.3631	0.8896
1.74737	2.0679	4.2357	1.03395
1.75789	2.2866	3.9979	1.1433
1.76842	1.896	3.8386	0.948
1.77895	1.5393	3.7176	0.76965
1.78947	1.4076	3.6858	0.7038
1.8	1.276	3.6072	0.638
1.81053	1.1125	3.5435	0.55625
1.82105	1.0828	3.4331	0.5414
1.83158	1.0764	3.3822	0.5382
1.84211	1.0892	3.3333	0.5446
1.85263	0.862	3.2442	0.431
1.86316	0.4947	3.1062	0.24735
1.87368	0.3376	3.0021	0.1688
1.88421	0.3248	2.949	0.1624
1.89474	0.3015	2.9108	0.15075
1.90526	0.2505	2.8747	0.12525
1.91579	0.2038	2.8153	0.1019
1.92632	0.1614	2.7983	0.0807
1.93684	0.1465	2.7771	0.07325
1.94737	0.121	2.7686	0.0605
1.95789	0.0955	2.7516	0.04775
1.96842	0.0764	2.7431	0.0382
1.97895	0.0637	2.7261	0.03185
1.98947	0.0382	2.7197	0.0191
2	0.0127	2.7028	0.00635
2.01053	0.0127	2.7028	0.00635
2.02105	0	2.7028	0
2.03158	0.0064	2.6985	0.0032
2.04211	0.0064	2.69	0.0032
