# Supplementary material for: Myosin light chain 3 serves as a receptor for nervous necrosis virus entry into host cells via the macropinocytosis pathway
Source: eLife journal article supplement (doi:10.7554/elife.104772), 2024-12-17
Supplement: fig6-data1 [file elife-104772-fig6-data1-v1.zip]

## Sheet: Sheet1
Oringinal data of Figure 6A
DMSO	1	0.123
AZD3463	0.2231	0.051
Picropodophyllin	0.31217	0.0987
NVP-TAE	1.15266	0.141
Gefitinib	0.95478	0.15111
SU11274	0.83841	0.1
