# Supplementary material for: Myosin light chain 3 serves as a receptor for nervous necrosis virus entry into host cells via the macropinocytosis pathway
Source: eLife journal article supplement (doi:10.7554/elife.104772), 2024-12-17
Supplement: fig6-data6 [file elife-104772-fig6-data6-v1.pdf]

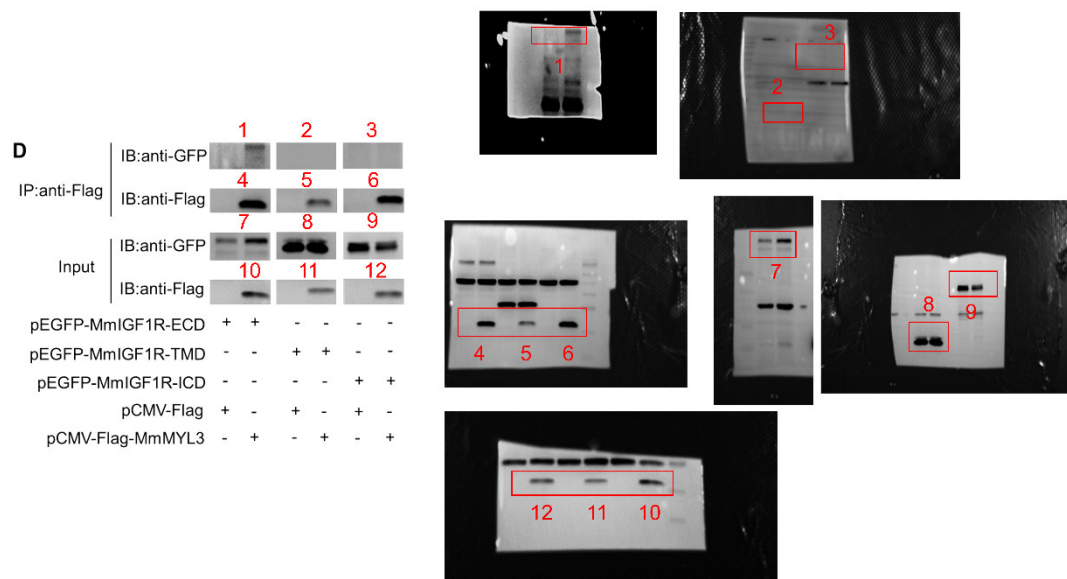

Figure 6, Source Data 2. Original membranes corresponding to Figure 6D. The red box marked as 1 represents the MmIGF1R-ECD of the IP group. The red box marked as 2 represents the MmIGF1R-TMD of the IP group. The red box marked as 3 represents the MmIGF1R-ICD of the IP group. The red box marked as 4, 5 and 6 represents the MmMYL3 of the IP group. The red box marked as 7 represents the MmIGF1R-ECD of the input group. The red box marked as 8 represents the MmIGF1R-TMD of the input group. The red box marked as 9 represents the MmIGF1R-ICD of the input group. The red box marked as 10, 11 and 12 represents the MmMYL3 of the input group.
