# Supplementary material for: Myosin light chain 3 serves as a receptor for nervous necrosis virus entry into host cells via the macropinocytosis pathway
Source: eLife journal article supplement (doi:10.7554/elife.104772), 2024-12-17
Supplement: fig6-data9 [file Figure 6-source data 9.xlsx]

## Sheet: Sheet1
Oringinal data of Figure 6F
Myc		Myc-MmIGF1R
1	0.137069	300.443	8.47504
0.747169	0.0259708	535.708	6.16608
