# Supplementary material for: Myosin light chain 3 serves as a receptor for nervous necrosis virus entry into host cells via the macropinocytosis pathway
Source: eLife journal article supplement (doi:10.7554/elife.104772), 2024-12-17
Supplement: fig6-data10 [file elife-104772-fig6-data10-v1.zip]

## Sheet: Sheet1
Oringinal data of Figure 6G
Myc		Myc-MmIGF1R
1	0.0913323	3.18662	0.110333
1.13964	0.0795099	4.35804	0.712835
