# Supplementary material for: Myosin light chain 3 serves as a receptor for nervous necrosis virus entry into host cells via the macropinocytosis pathway
Source: eLife journal article supplement (doi:10.7554/elife.104772), 2024-12-17
Supplement: fig6-data12 [file elife-104772-fig6-data12-v1.zip]

## Sheet: Sheet1
Oringinal data of Figure 6I
NC		siRNA
1	0.0166143	0.43774	0.01
1.121	0.0321378	0.33647	0.0123
