# Supplementary material for: Myosin light chain 3 serves as a receptor for nervous necrosis virus entry into host cells via the macropinocytosis pathway
Source: eLife journal article supplement (doi:10.7554/elife.104772), 2024-12-17
Supplement: fig7-data6 [file elife-104772-fig7-data6-v1.pdf]

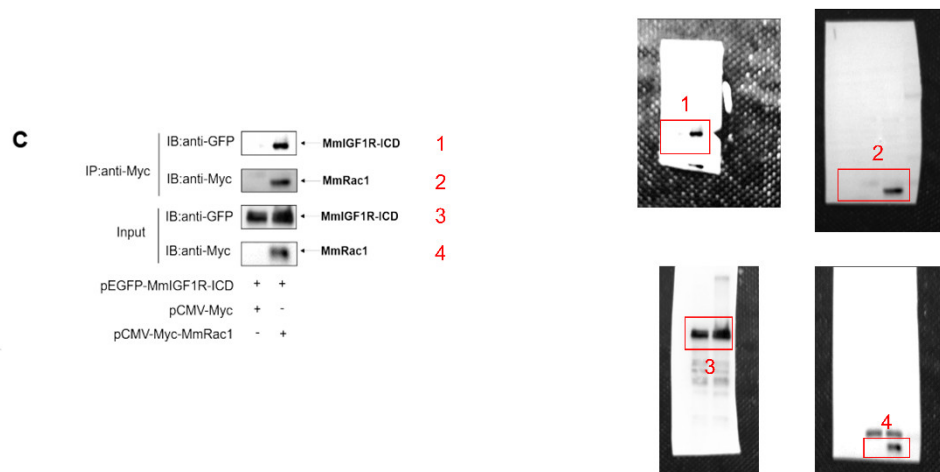

Figure 7, Source Data 3. Original membranes corresponding to Figure 7C. The red box marked as 1 represents the MmIGF1R-ICD of the IP group. The red box marked as 2 represents the MmRac1 of the IP group. The red box marked as 3 represents the MmIGF1R-ICD of the input group. The red box marked as 4 represents the MmRac1 of the input group.
