# Supplementary material for: Myosin light chain 3 serves as a receptor for nervous necrosis virus entry into host cells via the macropinocytosis pathway
Source: eLife journal article supplement (doi:10.7554/elife.104772), 2024-12-17
Supplement: fig7-data9 [file elife-104772-fig7-data9-v1.zip]

## Sheet: Sheet1
Original data of Figure 7E
Distance (pixels)	Gray value (MmRac1)	Gray value (MmIGF1R)
0	1.3778	1.14817
1	1.3897	1.15808
2	1.388	1.15667
3	1.3846	1.15383
4	1.388	1.15667
5	1.4017	1.16808
6	1.3795	1.14958
7	1.3932	1.161
8	1.3966	1.16383
9	1.3932	1.161
10	1.4017	1.16808
11	1.3983	1.16525
12	1.3949	1.16242
13	1.4017	1.16808
14	1.4068	1.17233
15	1.412	1.17667
16	1.4154	1.1795
17	1.4034	1.1695
18	1.4274	1.1895
19	1.4291	1.19092
20	1.4291	1.19092
21	1.4496	1.208
22	1.4479	1.20658
23	1.4581	1.21508
24	1.4564	1.21367
25	1.4684	1.22367
26	1.4889	1.24075
27	1.4735	1.22792
28	1.494	1.245
29	1.5316	1.27633
30	1.5274	1.27283
31	1.535	1.27917
32	1.5436	1.28633
33	1.5598	1.29983
34	1.5795	1.31625
35	1.5778	1.31483
36	1.6154	1.34617
37	1.6239	1.35325
38	1.6675	1.38958
39	1.6521	1.37675
40	1.7026	1.41883
41	1.7308	1.44233
42	1.7607	1.46725
43	1.8	1.5
44	1.7889	1.49075
45	1.806	1.505
46	1.8803	1.56692
47	1.9017	1.58475
48	1.9402	1.61683
49	1.9675	1.63958
50	2.0385	1.69875
51	2.0684	1.72367
52	2.1504	1.792
53	2.1761	1.81342
54	2.3	1.91667
55	2.3949	1.99575
56	2.5444	2.12033
57	2.6453	2.20442
58	2.8265	2.35542
59	3.0444	2.537
60	3.3197	2.76642
61	3.5812	2.98433
62	4.0197	3.34975
63	4.4419	3.70158
64	5.0855	4.23792
65	5.6573	4.71442
66	6.3333	5.27775
67	7.1154	5.9295
68	7.9128	6.594
69	8.7376	7.28133
70	9.6316	8.02633
71	10.6077	8.83975
72	11.8581	9.88175
73	13.1701	10.9751
74	14.7547	12.2956
75	16.2154	13.5128
76	17.735	14.7792
77	19.2573	16.0478
78	20.3103	16.9252
79	20.9906	17.4922
80	21.1778	17.6482
81	21.3256	17.7713
82	21.112	17.5933
83	20.541	17.1175
84	20.112	16.76
85	19.9598	16.6332
86	19.6573	16.3811
87	19.7709	16.4758
88	19.5761	16.3134
89	19.5769	16.3141
90	19.5709	16.3091
91	19.5966	16.3305
92	19.4957	16.2464
93	19.6991	16.4159
94	19.8607	16.5506
95	19.8034	16.5028
96	20.094	16.745
97	20.1607	16.8006
98	20.2308	16.859
99	20.4248	17.0207
100	20.4778	17.0648
101	20.6487	17.2072
102	20.8795	17.3996
103	20.9103	17.4252
104	21.265	17.7208
105	21.4521	17.8768
106	21.3051	17.7542
107	21.4068	17.839
108	21.1769	17.6474
109	21.3957	17.8298
110	21.2385	17.6988
111	21.2376	17.698
112	21.1598	17.6332
113	21.0949	17.5791
114	20.8966	17.4138
115	20.641	17.2008
116	20.3436	16.953
117	20.2581	16.8818
118	19.9504	16.6253
119	19.9547	16.6289
120	19.8615	16.5512
121	19.9991	16.6659
122	20.0462	16.7052
123	20.0701	16.7251
124	20.0573	16.7144
125	20.2487	16.8739
126	20.1829	16.8191
127	20.2393	16.8661
128	20.1068	16.7557
129	20.0137	16.6781
130	19.9821	16.6517
131	19.8932	16.5777
132	19.959	16.6325
133	20.0957	16.7464
134	20.2094	16.8412
135	20.1308	16.7757
136	20.394	16.995
137	20.3897	16.9914
138	20.3735	16.9779
139	20.2889	16.9074
140	20.1291	16.7742
141	20.1256	16.7713
142	19.9043	16.5869
143	19.8162	16.5135
144	19.6316	16.3597
145	19.2231	16.0192
146	19.0991	15.9159
147	18.7778	15.6482
148	18.5333	15.4444
149	18.2966	15.2472
150	18	15
151	17.5803	14.6502
152	17.3564	14.4637
153	17.0863	14.2386
154	16.8547	14.0456
155	16.4889	13.7408
156	16.1786	13.4822
157	15.953	13.2942
158	15.494	12.9117
159	15.2171	12.6809
160	14.9949	12.4957
161	14.694	12.245
162	14.4897	12.0747
163	14.4915	12.0762
164	14.3359	11.9466
165	14.4513	12.0427
166	14.5	12.0833
167	14.7658	12.3048
168	14.9556	12.463
169	15.2342	12.6952
170	15.5897	12.9914
171	15.9581	13.2984
172	16.2265	13.5221
173	16.4573	13.7144
174	16.7154	13.9295
175	16.6846	13.9038
176	16.5573	13.7978
177	16.5205	13.7671
178	16.3239	13.6032
179	16.135	13.4458
180	15.9393	13.2828
181	15.6607	13.0506
182	15.4863	12.9053
183	15.247	12.7058
184	15.1171	12.5976
185	14.7333	12.2777
186	14.5974	12.1645
187	14.1735	11.8112
188	14.1479	11.7899
189	14.0077	11.6731
190	13.7949	11.4957
191	13.6214	11.3512
192	13.6256	11.3547
193	13.6829	11.4024
194	13.7034	11.4195
195	13.6171	11.3476
196	13.6026	11.3355
197	13.4769	11.2308
198	13.3726	11.1438
199	13.3043	11.0869
200	12.9906	10.8255
201	12.9291	10.7743
202	12.9453	10.7878
203	12.8103	10.6753
204	12.9402	10.7835
205	13.0761	10.8968
206	13.2222	11.0185
207	13.4325	11.1937
208	13.5692	11.3077
209	13.4863	11.2386
210	13.3709	11.1424
211	13.2359	11.0299
212	13.0308	10.859
213	12.7983	10.6653
214	12.5897	10.4914
215	12.435	10.3625
216	12.2991	10.2492
217	12.2239	10.1866
218	12.1299	10.1082
219	12.2111	10.1759
220	12.2598	10.2165
221	12.265	10.2208
222	12.2214	10.1845
223	12.2094	10.1745
224	12.1709	10.1424
225	12.1684	10.1403
226	11.9598	9.9665
227	11.7581	9.79842
228	11.5684	9.64033
229	11.553	9.6275
230	11.3966	9.49717
231	11.3368	9.44733
232	11.2684	9.39033
233	11.2179	9.34825
234	11.3744	9.47867
235	11.3932	9.49433
236	11.4718	9.55983
237	11.535	9.6125
238	11.5897	9.65808
239	11.5393	9.61608
240	11.5077	9.58975
241	11.4915	9.57625
242	11.4342	9.5285
243	11.2769	9.39742
244	11.1718	9.30983
245	11.0179	9.18158
246	10.8026	9.00217
247	10.4957	8.74642
248	10.206	8.505
249	9.9376	8.28133
250	9.759	8.1325
251	9.712	8.09333
252	9.453	7.8775
253	9.3538	7.79483
254	9.1291	7.60758
255	9.1111	7.59258
256	9.012	7.51
257	8.9077	7.42308
258	8.9393	7.44942
259	8.9496	7.458
260	9.2359	7.69658
261	9.3308	7.77567
262	9.6786	8.0655
263	9.8701	8.22508
264	10.1162	8.43017
265	10.2744	8.562
266	10.4513	8.70942
267	10.5	8.75
268	10.4658	8.7215
269	10.4658	8.7215
270	10.3094	8.59117
271	10.2838	8.56983
272	10.2906	8.5755
273	10.4462	8.70517
274	10.3949	8.66242
275	10.4889	8.74075
276	10.5538	8.79483
277	10.6214	8.85117
278	10.8145	9.01208
279	10.9855	9.15458
280	11.2017	9.33475
281	11.4085	9.50708
282	11.3265	9.43875
283	11.2043	9.33692
284	10.8043	9.00358
285	10.3342	8.61183
286	9.7641	8.13675
287	9.288	7.74
288	8.7385	7.28208
289	8.2103	6.84192
290	7.7034	6.4195
291	7.2538	6.04483
292	6.8957	5.74642
293	6.4521	5.37675
294	6.1846	5.15383
295	5.859	4.8825
296	5.5009	4.58408
297	5.2496	4.37467
298	4.9222	4.10183
299	4.5983	3.83192
300	4.4581	3.71508
301	4.165	3.47083
302	3.9402	3.2835
303	3.7598	3.13317
304	3.553	2.96083
305	3.4333	2.86108
306	3.2821	2.73508
307	3.2214	2.6845
308	3.0436	2.53633
309	2.8906	2.40883
310	2.8043	2.33692
311	2.7205	2.26708
312	2.5949	2.16242
313	2.5667	2.13892
314	2.5	2.08333
315	2.3889	1.99075
316	2.3761	1.98008
317	2.3034	1.9195
318	2.235	1.8625
319	2.2034	1.83617
320	2.1547	1.79558
321	2.1222	1.7685
322	2.0786	1.73217
323	2.0299	1.69158
324	2.0137	1.67808
325	1.9915	1.65958
326	1.9615	1.63458
327	1.959	1.6325
328	1.9402	1.61683
329	1.9043	1.58692
330	1.8726	1.5605
331	1.8598	1.54983
332	1.8291	1.52425
333	1.7957	1.49642
334	1.7709	1.47575
335	1.7701	1.47508
336	1.7376	1.448
337	1.7248	1.43733
338	1.7009	1.41742
339	1.6821	1.40175
340	1.6308	1.359
341	1.6197	1.34975
342	1.6197	1.34975
343	1.5726	1.3105
344	1.5632	1.30267
345	1.5333	1.27775
346	1.547	1.28917
347	1.4991	1.24925
348	1.4872	1.23933
349	1.4846	1.23717
350	1.4547	1.21225
351	1.441	1.20083
352	1.4359	1.19658
353	1.4171	1.18092
354	1.3863	1.15525
355	1.388	1.15667
356	1.388	1.15667
357	1.3726	1.14383
358	1.3675	1.13958
359	1.3658	1.13817
