# Supplementary material for: Myosin light chain 3 serves as a receptor for nervous necrosis virus entry into host cells via the macropinocytosis pathway
Source: eLife journal article supplement (doi:10.7554/elife.104772), 2024-12-17
Supplement: fig7-data10 [file elife-104772-fig7-data10-v1.zip]

## Sheet: Sheet1
Original data of Figure 7F
Distance (pixels)	Gray value (MmCdc42)	Gray value (MmIGF1R)
0	0.6991	1.3982
1	0.70155	1.4031
2	0.70795	1.4159
3	0.7119	1.4238
4	0.7237	1.4474
5	0.72615	1.4523
6	0.7306	1.4612
7	0.73355	1.4671
8	0.73745	1.4749
9	0.74925	1.4985
10	0.7517	1.5034
11	0.75025	1.5005
12	0.7591	1.5182
13	0.76305	1.5261
14	0.7704	1.5408
15	0.77975	1.5595
16	0.7891	1.5782
17	0.79745	1.5949
18	0.80285	1.6057
19	0.81025	1.6205
20	0.81365	1.6273
21	0.82745	1.6549
22	0.8422	1.6844
23	0.8461	1.6922
24	0.854	1.708
25	0.8633	1.7266
26	0.8702	1.7404
27	0.881	1.762
28	0.88445	1.7689
29	0.8943	1.7886
30	0.90855	1.8171
31	0.9012	1.8024
32	0.91345	1.8269
33	0.93265	1.8653
34	0.93905	1.8781
35	0.94885	1.8977
36	0.9602	1.9204
37	0.9695	1.939
38	0.9754	1.9508
39	0.972	1.944
40	0.99265	1.9853
41	1.001	2.002
42	1.0162	2.0324
43	1.0177	2.0354
44	1.0221	2.0442
45	1.0398	2.0796
46	1.05115	2.1023
47	1.0521	2.1042
48	1.06885	2.1377
49	1.07815	2.1563
50	1.09195	2.1839
51	1.0934	2.1868
52	1.1116	2.2232
53	1.1165	2.233
54	1.12145	2.2429
55	1.12635	2.2527
56	1.13865	2.2773
57	1.1465	2.293
58	1.14945	2.2989
59	1.16075	2.3215
60	1.16665	2.3333
61	1.18045	2.3609
62	1.1809	2.3618
63	1.1927	2.3854
64	1.1937	2.3874
65	1.19765	2.3953
66	1.20405	2.4081
67	1.20355	2.4071
68	1.20795	2.4159
69	1.2237	2.4474
70	1.22715	2.4543
71	1.2301	2.4602
72	1.2404	2.4808
73	1.25565	2.5113
74	1.26055	2.5211
75	1.2768	2.5536
76	1.2881	2.5762
77	1.3053	2.6106
78	1.32645	2.6529
79	1.35005	2.7001
80	1.3648	2.7296
81	1.3825	2.765
82	1.3928	2.7856
83	1.4174	2.8348
84	1.44	2.88
85	1.4538	2.9076
86	1.5	3
87	1.5187	3.0374
88	1.5462	3.0924
89	1.56885	3.1377
90	1.59735	3.1947
91	1.6165	3.233
92	1.66275	3.3255
93	1.70945	3.4189
94	1.7704	3.5408
95	1.8358	3.6716
96	1.87215	3.7443
97	1.9459	3.8918
98	2.0049	4.0098
99	2.0418	4.0836
100	2.09585	4.1917
101	2.14455	4.2891
102	2.21385	4.4277
103	2.27485	4.5497
104	2.3127	4.6254
105	2.36875	4.7375
106	2.41545	4.8309
107	2.46165	4.9233
108	2.47395	4.9479
109	2.52505	5.0501
110	2.501	5.002
111	2.53145	5.0629
112	2.5423	5.0846
113	2.5875	5.175
114	2.6303	5.2606
115	2.6647	5.3294
116	2.6947	5.3894
117	2.73355	5.4671
118	2.7581	5.5162
119	2.80235	5.6047
120	2.84905	5.6981
121	2.9238	5.8476
122	3.01325	6.0265
123	3.14895	6.2979
124	3.3073	6.6146
125	3.39725	6.7945
126	3.50985	7.0197
127	3.5634	7.1268
128	3.5885	7.177
129	3.64305	7.2861
130	3.7129	7.4258
131	3.7876	7.5752
132	3.87855	7.7571
133	3.9641	7.9282
134	4.0811	8.1622
135	4.17845	8.3569
136	4.32595	8.6519
137	4.5069	9.0138
138	4.72565	9.4513
139	4.95675	9.9135
140	5.21485	10.4297
141	5.3712	10.7424
142	5.5757	11.1514
143	5.73355	11.4671
144	5.92135	11.8427
145	6.06045	12.1209
146	6.30185	12.6037
147	6.47885	12.9577
148	6.67795	13.3559
149	6.7709	13.5418
150	6.85695	13.7139
151	6.91545	13.8309
152	6.94295	13.8859
153	6.9302	13.8604
154	6.9169	13.8338
155	6.9341	13.8682
156	6.9587	13.9174
157	6.9056	13.8112
158	6.89035	13.7807
159	6.8638	13.7276
160	6.8515	13.703
161	6.90265	13.8053
162	6.86085	13.7217
163	6.86825	13.7365
164	6.9164	13.8328
165	6.99855	13.9971
166	7.00145	14.0029
167	7.10915	14.2183
168	7.12095	14.2419
169	7.17305	14.3461
170	7.24975	14.4995
171	7.35105	14.7021
172	7.46855	14.9371
173	7.5934	15.1868
174	7.74435	15.4887
175	7.9238	15.8476
176	7.95575	15.9115
177	7.9946	15.9892
178	7.911	15.822
179	7.94395	15.8879
180	7.9002	15.8004
181	7.8191	15.6382
182	7.8653	15.7306
183	7.88985	15.7797
184	7.9366	15.8732
185	8.0359	16.0718
186	8.12195	16.2439
187	8.2306	16.4612
188	8.38055	16.7611
189	8.41985	16.8397
190	8.52065	17.0413
191	8.5403	17.0806
192	8.62095	17.2419
193	8.766	17.532
194	8.9012	17.8024
195	9.0285	18.057
196	9.16075	18.3215
197	9.2537	18.5074
198	9.3191	18.6382
199	9.43115	18.8623
200	9.45525	18.9105
201	9.5762	19.1524
202	9.6578	19.3156
203	9.6637	19.3274
204	9.70995	19.4199
205	9.66815	19.3363
206	9.63865	19.2773
207	9.58405	19.1681
208	9.50835	19.0167
209	9.44935	18.8987
210	9.411	18.822
211	9.36675	18.7335
212	9.43315	18.8663
213	9.4892	18.9784
214	9.53095	19.0619
215	9.6362	19.2724
216	9.7645	19.529
217	9.94885	19.8977
218	10.1145	20.2291
219	10.4262	20.8525
220	10.6102	21.2203
221	10.7561	21.5123
222	10.878	21.7561
223	10.9189	21.8378
224	10.8264	21.6529
225	10.7797	21.5595
226	10.7251	21.4503
227	10.7143	21.4287
228	10.6991	21.3982
229	10.6913	21.3825
230	10.6667	21.3333
231	10.7015	21.4031
232	10.7345	21.469
233	10.6716	21.3432
234	10.6013	21.2026
235	10.5526	21.1052
236	10.411	20.822
237	10.3898	20.7797
238	10.2792	20.5585
239	10.147	20.294
240	10.1022	20.2045
241	10.0172	20.0344
242	9.80775	19.6155
243	9.70255	19.4051
244	9.55115	19.1023
245	9.38985	18.7797
246	9.2812	18.5624
247	9.18635	18.3727
248	9.05555	18.1111
249	9.0305	18.061
250	8.93805	17.8761
251	8.8751	17.7502
252	8.82055	17.6411
253	8.75125	17.5025
254	8.73895	17.4779
255	8.69815	17.3963
256	8.59635	17.1927
257	8.51475	17.0295
258	8.4061	16.8122
259	8.3004	16.6008
260	8.3068	16.6136
261	8.3058	16.6116
262	8.29845	16.5969
263	8.3191	16.6382
264	8.27235	16.5447
265	8.28615	16.5723
266	8.2227	16.4454
267	8.21585	16.4317
268	8.20305	16.4061
269	8.1534	16.3068
270	8.11555	16.2311
271	8.09195	16.1839
272	8.14995	16.2999
273	8.08015	16.1603
274	8.0762	16.1524
275	8.06195	16.1239
276	8.1283	16.2566
277	8.2045	16.409
278	8.24925	16.4985
279	8.33385	16.6677
280	8.38055	16.7611
281	8.42725	16.8545
282	8.45135	16.9027
283	8.4813	16.9626
284	8.5182	17.0364
285	8.53345	17.0669
286	8.54275	17.0855
287	8.5226	17.0452
288	8.5231	17.0462
289	8.5462	17.0924
290	8.52165	17.0433
291	8.53835	17.0767
292	8.49755	16.9951
293	8.5526	17.1052
294	8.5103	17.0206
295	8.4223	16.8446
296	8.44395	16.8879
297	8.3638	16.7276
298	8.2891	16.5782
299	8.265	16.53
300	8.19125	16.3825
301	8.1303	16.2606
302	8.07965	16.1593
303	8.07225	16.1445
304	8.058	16.116
305	8.03195	16.0639
306	8.03195	16.0639
307	7.9892	15.9784
308	7.9366	15.8732
309	7.93955	15.8791
310	7.99855	15.9971
311	7.9597	15.9194
312	8.00245	16.0049
313	7.99805	15.9961
314	8.00835	16.0167
315	8.0462	16.0924
316	8.0934	16.1868
317	8.1657	16.3314
318	8.2773	16.5546
319	8.28415	16.5683
320	8.29255	16.5851
321	8.2001	16.4002
322	8.22515	16.4503
323	8.13865	16.2773
324	8.1411	16.2822
325	8.13965	16.2793
326	8.05115	16.1023
327	8.03835	16.0767
328	7.942	15.884
329	7.91495	15.8299
330	7.9243	15.8486
331	7.9695	15.939
332	8.029	16.058
333	8.04865	16.0973
334	8.13375	16.2675
335	8.1367	16.2734
336	8.07425	16.1485
337	7.9956	15.9912
338	7.9779	15.9558
339	7.8771	15.7542
340	7.83825	15.6765
341	7.8058	15.6116
342	7.7714	15.5428
343	7.74435	15.4887
344	7.72715	15.4543
345	7.69075	15.3815
346	7.6647	15.3294
347	7.6598	15.3196
348	7.62635	15.2527
349	7.63965	15.2793
350	7.59195	15.1839
351	7.5659	15.1318
352	7.56295	15.1259
353	7.57815	15.1563
354	7.62585	15.2517
355	7.64505	15.2901
356	7.65735	15.3147
357	7.619	15.238
358	7.56635	15.1327
359	7.5103	15.0206
360	7.3928	14.7856
361	7.32105	14.6421
362	7.2758	14.5516
363	7.26645	14.5329
364	7.22175	14.4435
365	7.19225	14.3845
366	7.08015	14.1603
367	7.028	14.056
368	6.9774	13.9548
369	6.83725	13.6745
370	6.766	13.532
371	6.68485	13.3697
372	6.6534	13.3068
373	6.6642	13.3284
374	6.61555	13.2311
375	6.6539	13.3078
376	6.6352	13.2704
377	6.5998	13.1996
378	6.4956	12.9912
379	6.4597	12.9194
380	6.3176	12.6352
381	6.20945	12.4189
382	6.08605	12.1721
383	5.91985	11.8397
384	5.766	11.532
385	5.59585	11.1917
386	5.5044	11.0088
387	5.3643	10.7286
388	5.3073	10.6146
389	5.2537	10.5074
390	5.27385	10.5477
391	5.293	10.586
392	5.3353	10.6706
393	5.4002	10.8004
394	5.44445	10.8889
395	5.4823	10.9646
396	5.46805	10.9361
397	5.45725	10.9145
398	5.4361	10.8722
399	5.43905	10.8781
400	5.37415	10.7483
401	5.2832	10.5664
402	5.1834	10.3668
403	5.03685	10.0737
404	4.8481	9.6962
405	4.62585	9.2517
406	4.3466	8.6932
407	4.01475	8.0295
408	3.6814	7.3628
409	3.34855	6.6971
410	2.9479	5.8958
411	2.5767	5.1534
412	2.2527	4.5054
413	1.93705	3.8741
414	1.70945	3.4189
415	1.50295	3.0059
416	1.3289	2.6578
417	1.2291	2.4582
418	1.13125	2.2625
419	1.06295	2.1259
420	1.0069	2.0138
421	0.95675	1.9135
422	0.9282	1.8564
423	0.9007	1.8014
424	0.86875	1.7375
425	0.8402	1.6804
426	0.81415	1.6283
427	0.80285	1.6057
428	0.7891	1.5782
429	0.7635	1.527
430	0.75715	1.5143
431	0.7463	1.4926
432	0.73255	1.4651
433	0.7188	1.4376
434	0.7114	1.4228
435	0.7001	1.4002
436	0.69815	1.3963
437	0.69715	1.3943
438	0.69175	1.3835
439	0.68435	1.3687
440	0.68045	1.3609
441	0.677	1.354
442	0.67455	1.3491
443	0.676	1.352
444	0.67355	1.3471
445	0.6691	1.3382
446	0.6691	1.3382
447	0.6691	1.3382
448	0.66715	1.3343
449	0.66715	1.3343
450	0.66715	1.3343
451	0.66665	1.3333
452	0.66715	1.3343
453	0.66665	1.3333
454	0.66715	1.3343
455	0.66665	1.3333
456	0.66665	1.3333
457	0.66715	1.3343
458	0.66715	1.3343
459	0.66665	1.3333
460	0.66665	1.3333
461	0.66665	1.3333
462	0.66715	1.3343
463	0.66665	1.3333
464	0.66665	1.3333
465	0.66665	1.3333
466	0.66665	1.3333
467	0.66665	1.3333
468	0.66665	1.3333
469	0.66665	1.3333
470	0.66665	1.3333
471	0.66715	1.3343
472	0.66665	1.3333
473	0.66665	1.3333
474	0.66665	1.3333
475	0.66665	1.3333
476	0.66665	1.3333
477	0.66665	1.3333
478	0.66665	1.3333
479	0.66665	1.3333
480	0.66665	1.3333
481	0.66715	1.3343
482	0.66665	1.3333
483	0.66665	1.3333
484	0.66665	1.3333
485	0.66665	1.3333
486	0.66665	1.3333
487	0.66665	1.3333
488	0.66665	1.3333
489	0.66665	1.3333
490	0.66665	1.3333
491	0.66665	1.3333
492	0.66665	1.3333
493	0.66665	1.3333
494	0.66665	1.3333
495	0.66665	1.3333
496	0.66665	1.3333
497	0.66665	1.3333
498	0.66665	1.3333
499	0.66665	1.3333
500	0.66665	1.3333
501	0.66665	1.3333
502	0.66665	1.3333
503	0.66665	1.3333
504	0.66665	1.3333
505	0.66665	1.3333
506	0.66665	1.3333
507	0.66665	1.3333
508	0.66665	1.3333
509	0.66665	1.3333
510	0.66665	1.3333
511	0.66665	1.3333
512	0.66665	1.3333
513	0.66665	1.3333
514	0.66665	1.3333
515	0.66665	1.3333
516	0.66665	1.3333
517	0.66665	1.3333
518	0.66665	1.3333
