# Supplementary material for: Myosin light chain 3 serves as a receptor for nervous necrosis virus entry into host cells via the macropinocytosis pathway
Source: eLife journal article supplement (doi:10.7554/elife.104772), 2024-12-17
Supplement: fig7-data11 [file elife-104772-fig7-data11-v1.zip]

## Sheet: Sheet1
Oringinal data of Figure 7G
Myc		Myc-MmRac1
1	0.00461901	5661.6	214
1.22867	0.0062607	893.867	72.336
