# Supplementary material for: Myosin light chain 3 serves as a receptor for nervous necrosis virus entry into host cells via the macropinocytosis pathway
Source: eLife journal article supplement (doi:10.7554/elife.104772), 2024-12-17
Supplement: fig7-data12 [file elife-104772-fig7-data12-v1.zip]

## Sheet: Sheet1
Oringinal data of Figure 7H
Myc		Myc-MmRac1
0.999997	0.123003	4.12823	0.594574
1.895	0.172183	7.83969	0.640164
