# Supplementary material for: Myosin light chain 3 serves as a receptor for nervous necrosis virus entry into host cells via the macropinocytosis pathway
Source: eLife journal article supplement (doi:10.7554/elife.104772), 2024-12-17
Supplement: fig7-data13 [file elife-104772-fig7-data13-v1.zip]

## Sheet: Sheet1
Oringinal data of Figure 7I
Myc		Myc-MmCdc42
1	0.00461901	3661.6	114
1.22867	0.0062607	1893.87	172.336
