# Supplementary material for: Myosin light chain 3 serves as a receptor for nervous necrosis virus entry into host cells via the macropinocytosis pathway
Source: eLife journal article supplement (doi:10.7554/elife.104772), 2024-12-17
Supplement: fig7-data14 [file elife-104772-fig7-data14-v1.zip]

## Sheet: Sheet1
Oringinal data of Figure 7J
Myc		Myc-MmCdc42
1	0.199995	5.22634	0.364215
1.33964	0.0761821	4.09838	0.32375
