# Supplementary material for: Myosin light chain 3 serves as a receptor for nervous necrosis virus entry into host cells via the macropinocytosis pathway
Source: eLife journal article supplement (doi:10.7554/elife.104772), 2024-12-17
Supplement: fig7-data15 [file elife-104772-fig7-data15-v1.zip]

## Sheet: Sheet1
Oringinal data of Figure 7K
DMSO	0.999997	0.133139
10μM	0.873875	0.067628
20μM	0.168743	0.0224987
50μM	0.112554	0.00818836
