# Supplementary material for: Myosin light chain 3 serves as a receptor for nervous necrosis virus entry into host cells via the macropinocytosis pathway
Source: eLife journal article supplement (doi:10.7554/elife.104772), 2024-12-17
Supplement: fig7-data16 [file elife-104772-fig7-data16-v1.zip]

## Sheet: Sheet1
Oringinal data of Figure 7L
DMSO	1	0.123
10μM	0.671272	0.119522
20μM	0.212781	0.0275617
50μM	0.136351	0.00955344
